# Supplementary material
Source: PubMed Central journal article supplement (PMC2694412)
Supplement: NIHMS106788-supplement-Supplementary_Info.pdf [file NIHMS106788-supplement-Supplementary_Info.pdf]

# Supplementary Information

for

## Somatic mutations affect key pathways in lung adenocarcinoma

Li Ding, Gad Getz, David A. Wheeler, Elaine R. Mardis, Michael D. McLellan, Kristian Cibulskis, Carrie Sougnez, Heidi Greulich, Donna M. Muzny, Margaret B. Morgan, Lucinda Fulton, Robert S. Fulton, Qunyuan Zhang, Michael C. Wendl, Michael Lawrence, David E. Larson, Ken Chen, David J. Dooling, Aniko Sabo, Alicia C. Hawes, Hua Shen, Shalini N. Jhangiani, Lora R. Lewis, Otis Hall, Yiming Zhu, Tittu Mathew, Yanru Ren, Jiqiang Yao, Steven E. Scherer, Kerstin Clerc, Ginger A. Metcalf, Brian Ng, Aleksandar Milosavljevic, Manuel L. Gonzalez-Garay, John R. Osborne, Rick Meyer, Xiaoqi Shi, Yuzhu Tang, Daniel C. Koboldt, Ling Lin, Rachel Abbott, Tracie L. Miner, Craig Pohl, Ginger Fewell, Carrie Haipek, Heather Schmidt, Brian H. Dunford-Shore, Aldi Kraja, Seth D. Crosby, Christopher S. Sawyer, Tammi Vickery, Sacha Sander, Jody Robinson, Wendy Winckler, Jennifer Baldwin, Lucian R Chirieac, Amit Dutt, Tim Fennell, Megan Hanna, Bruce E. Johnson, Robert C. Onofrio, Roman K. Thomas, Giovanni Tonon, Barbara A. Weir, Xiaojun Zhao, Liuda Ziaugra, Michael C. Zody, Thomas Giordano, Mark B. Orringer, Jack A. Roth, Margaret R. Spitz, Ignacio I. Wistuba, Bradley Ozenberger, Peter Good, Andrew C. Chang, David G. Beer, Mark A. Watson, Marc Ladanyi, Stephen Broderick, Akihiko Yoshizawa, William D. Travis, William Pao, Michael A. Province, George M. Weinstock, Harold E. Varmus, Stacey B. Gabriel, Eric S. Lander, Richard A. Gibbs, Matthew Meyerson, Richard K. Wilson

Excel spreadsheets can be downloaded from [http://genome.wustl.edu/supplemental/tsp\\_nature\\_2008](http://genome.wustl.edu/supplemental/tsp_nature_2008)

## Table of Content

- A. Supplementary Methods (pg 3-18)
- B. Supplementary Figures (pg 19-26)
- C. Supplementary Figure Legends (pg 27)
- D. Supplementary Tables (pg 28-141)
- E. Supplementary References (pg 142)

## A. Supplementary Methods

### Section I. Gene list and sample

#### Gene list origins and tumor sample selection

The TSP gene list consists of 623 genes, many of which have previously been implicated as proto-oncogenes or tumor suppressor genes related to solid tumor development. Genes from selected signaling pathways and additional enzyme families also were selected for this study. In addition, some genes from regions on chromosomes 3 and 22, implicated in lung cancer by copy number analysis, were included. Protein family/domain and gene ontology annotation for the 623 TSP genes are shown in Supplementary Table 1.

To identify statistically significant recurrent mutations, we sequenced these genes in 188 lung adenocarcinomas that were selected from an initial set of 384 snap-frozen lung adenocarcinoma biopsy samples, each containing a minimum of 70% tumor cells according to pathology evaluation. These samples were anonymized, and contributed along with matched normal samples by the Dana-Farber Cancer Institute, MD Anderson Cancer Center, Memorial Sloan-Kettering Cancer Center, University of Michigan, and Washington University in St. Louis. All 384 samples were run on 250K StyI Affymetrix SNP Arrays. Analysis of Affymetrix 250K SNP array data enabled the selection of 188 tumors for re-sequencing, whereby tumors displaying LOH and/or hemizygous deletion for a minimum of 10 Mb on the array were preferentially selected. Here, copy number data were visually inspected to categorize samples based on the following criteria:

- *Pass*: presence of an uninterrupted stretch of loss of heterozygosity (LOH) or hemizygous deletion with a copy number less than 1.4 (indicating >60% tumor purity) for a minimum of 10 Mb.
- *Borderline*: presence of hemizygous deletion with a copy number between 1.4 and 1.6 (indicating 40-60% tumor purity) for a minimum of 10 Mb.
- *Fail*: absence of these qualifying events.

In addition, samples exhibiting any type of technical or protocol failure, such as mismatch between the tumor and normal sample or low quality data, were excluded. These categories, used as a proxy for stromal contamination, were later computationally formalized using a metric defined as the standard deviation of the medians of log<sub>2</sub> copy-number ratios in each chromosome arm. The first plate of 94 samples was comprised of samples from the “Pass” and “Borderline” categories.

To test the proposition that copy number data from SNP arrays could be used as a genomic indicator for stromal contamination, as described above, we sequenced the *EGFR*, *KRAS*, and *TP53* genes by both traditional Sanger sequencing and 454 single molecule sequencing. We processed 96 samples chosen randomly from the larger set of 384. The 454 allele frequency generally tracked with both the SNP array category and the ability to detect mutations by Sanger sequencing for each sample. Yet, there were 8 samples that exhibited 454 allele frequencies above 30% (indicating >60% tumor purity) with mutations still detectable by Sanger sequencing, despite the absence of qualifying lesions on SNP arrays (data not shown). In light of these data, the second plate of 94

samples was comprised of the remaining “Pass” samples that were still available, as well as samples chosen at random from the “Borderline” and “Fail” categories (Supplementary Table 17).

#### Interpro analysis of 623 genes selected for TSP

Peptide sequences for each transcript were created and stored in a fasta file, which was subsequently processed with Interproscan, specifically the HMMPfam and superfamily analyses. The results were loaded into a relational database, enabling queries for protein domain, protein family, gene ontology (GO), etc.

## Section II. Sequencing strategy and mutation analysis

### Sequencing strategy and mutation detection

We screened 188 primary lung adenocarcinoma tumors for somatic mutations, focusing on the coding exons and splice donor and acceptor sites of 623 human genes. In total, we re-sequenced 247Mb from the full set of tumor genomes utilizing PCR amplification, followed by fluorescent terminator-based capillary sequencing. Coverage analysis demonstrates Phred Q30 coverage for greater than 90% of the target bases. Raw DNA sequence trace data were analyzed using a combination of mutation detection algorithms, including PolyScan<sup>1</sup>, PolyPhred<sup>2</sup>, PolyDhan (unpublished), PolyTedd (unpublished), and SNPdetector<sup>3</sup> to discover single nucleotide variants and small insertions and deletions (indels). Putative mutations were verified by a second round of PCR-directed sequencing, or were validated by orthogonal methods, including Sequenom genotyping, custom Illumina Golden Gate assays, Applied Biosystems Taqman and/or PCR-based pyrosequencing with the Roche 454 FLX or Biotage platforms (Supplementary Fig. 1). Orthogonal validation included the assay of the matched normal genomic DNA sample (derived from adjacent normal lung tissue or PBLs), to confirm the somatic origin of each variant.

In order to compare results from PCR-directed sequencing and associated variant discovery pipelines across the three sequencing centers (Human Genome Sequencing Center at Baylor College of Medicine, Broad Institute at MIT and Harvard, and The Genome Center at Washington University), 61 genes representing frequently mutated oncogenes and tumor suppressor genes (Supplementary Table 1) were sequenced independently at all three centers and the resulting verified and/or validated mutations were used for concordance analysis. Mutations observed independently by at least two centers were accepted as true positives and had the highest rate of validation by orthogonal methods while mutations discovered by only a single center from a single amplification attempt were likely to be false positives. Therefore, additional supporting data were generated by orthogonal validation methods or independent amplification attempts followed by manual review, to verify all reported mutations in 623 TSP genes.

### Description of PCR-based sequencing pipelines

Primers were designed according to target region(s) of interest. The design process included a validation step for both primers and DNA templates to ensure quality. Each DNA template was then amplified with each primer pair for PCR-directed genomic re-sequencing. Dye terminator sequencing was followed by separation and detection on ABI 3730xl sequencers. The resulting data were screened for mutations through a series of automated and manual steps. A supplemental round of “confirmation” sequencing was performed in an attempt to verify putative mutations, which were then further validated utilizing an alternative genotyping and/or sequencing platform. These steps included the matched normal genomic DNA sample to establish the nature of the variant (somatic or germline). All traces were deposited in the NCBI Trace Archive (<http://www.ncbi.nlm.nih.gov/Traces/trace.cgi>) under randomized trace names to prevent future identification of the individuals.

### Validation approaches

Putative single nucleotide variants were validated on the Illumina Golden Gate Genotyping platform, the Sequenom MassARRAY platform or, alternatively using TaqMan, Biotage assays, or 454 re-sequencing. Putative indels verified after second pass sequencing were manually reviewed and annotated, then validated either on the Biotage pyrosequencer or the 454 FLX. Verified and validated mutations were used for downstream analysis.

### 454 FLX-based indel validation

Putative indels detected in 3730-based resequencing of TSP samples were validated with PCR-directed 454 sequencing. Resulting 454 reads were mapped to the human reference sequence (hg36) using BLAT and CrossMatch (unpublished). Subsequent processing of the mapped 454 reads identified the gap position, if any, and compared it to the position predicted by Sanger sequencing. The list of indels targeted from 3730 data was cross-referenced with the best alignments to determine the overall 454 sequence coverage in both normal and tumor. Target indels were then cross-referenced with 454 indels, matching up indels of the same type, of similar size (within 2 bp), and having similar chromosomal position (within 2 bp). This step was performed separately for normal and tumor. In the event that multiple 454-detected indels matched a target indel, the one with the highest number of supporting reads was retained. To determine validation status, the list of targeted indels was populated with the 454 read coverage, detected indels, and the number of indel-supporting reads. Target indels were deemed as validated when sufficient read coverage was achieved in both samples and the fraction of the reads harboring the indel exceeded a predetermined threshold. The combination of 3730 trace and 454 validation data were used to determine the status of indels.

### Biotage-based indel detection

The validation process involves assay design, assay validation, and tumor sample analysis. The process begins with the PSQ Assay Design Software distributed by Biotage which identifies two amplification primers flanking the sequence of interest (one of which is biotinylated) and a sequencing primer. The assay design is validated by both PCR product generation and subsequent Pyrosequencing using human genomic DNA as a template. If the assay works on human genomic DNA, the process is repeated with the designated tumor samples. The data is analyzed by the instrument software and reviewed and assembled by the technician.

### Indel annotation

Boundaries of insertion, deletion and complex rearrangements are annotated as follows (see also Reporting Mutations, "MAF file format", below)

#### *Insertions:*

- \* Start Position is the base before the insertion site
- \* End Position is the base after the insertion site
- \* The reference sequence is reported as “-“
- \* The inserted sequence is reported on the positive genomic strand

\* When multiple alignments are possible, the position is reported as the 3' most alignment on the annotated gene's strand.

*Deletions:*

- \* Start Position is the first base deleted
- \* End Position is the last base deleted
- \* The reference sequence is reported as the sequence from the Start Position to the End Position on the positive genomic strand
- \* The deleted sequence is reported as “-“
- \* When multiple alignments are possible the position is shifted to the 3' most alignment on the annotated gene's strand.

*Complex Indels and Insertions and Deletions with multiple complex alignments:*

- \* Start Position is the first base deleted or first base of the repeat
- \* End Position is the last base deleted or the last base of the repeat
- \* The reference sequence is reported as sequence deleted from the Start Position to End Position on the positive genomic strand
- \* The inserted sequence is reported as the sequence that replaces the reference sequence on the positive genomic strand

Detecting dinucleotide polymorphisms in 454 sequence data

Dinucleotide polymorphisms (DNPs) were detected during the pairwise sequence comparison between read and reference sequences. A DNP event was identified as two substitutions (relative to the reference) at consecutive aligned bases within a single read. All DNP events were then combined to calculate the number of reads supporting each DNP.

Target coverage calculation

Since the position of a SNP might receive a lower quality score due to the presence of double peaks, a sliding window of 15bp was used to evaluate the coverage of the center base of each window. The center base of each window was considered covered when at least 2/3 of the window's bases, typically 10bp out of the 15bp, were covered by Phred quality scores of at least Q30.

*In silico* predictions of functional consequences of mutations

We used SIFT<sup>4</sup> and PolyPhen<sup>5</sup> to evaluate the potential impact on protein function for 811 missense mutations. Given the amino acid substitution and protein fasta sequence as inputs, these two programs return predictions of possible functional impact for non-synonymous variants. PolyPhen identifies homologues via BLAST search in the NR database, while SIFT searches against the human SWALL database. SIFT predicts functional changes based on sequence homology and physical properties of amino acids while PolyPhen uses sequence, phylogenetic, and structural information to characterize the substitutions. SIFT predicted 430 missense mutations as deleterious and 297 as tolerated. PolyPhen predicted 438 mutations as probably/possibly damaging and 331 as benign. Taken together, these programs identified 579 mutations having potential

functional relevance and these have been prioritized for further functional studies (Supplementary Table 2).

#### Comparison of mutations with COSMIC and OMIM databases

Detected and annotated mutations were compared to the COSMIC (version 35) and OMIM (1/15/2008 download) databases to assess novelty. For each mutation, all possible matching transcripts were used to determine possible amino acid changes with respect to both residue and position within the associated protein. This change was then checked against the two databases. If both position and residue were identical, the mutation was declared a match. A match was also declared if only the position within the protein matched that of a mutation found within either database. In cases where a mutation affected a splice site, we checked to see if its genomic coordinates were present in COSMIC. (OMIM does not include genomic coordinates.) Mutations not detected by the above methods were considered novel.



### Section III. Mutation profiles, background mutation rate, as well as significantly mutated genes, protein domains, and pathways

#### Molecular signatures of non-synonymous and synonymous mutations

Mutation signatures may reflect histories of mutagen exposure or DNA mismatch repair defects, thereby providing insights into cancer etiology. We have identified 1,013 non-synonymous mutations in 623 genes and another 108 synonymous mutations in a 250 gene subset. This allowed us to analyze the mutation signatures of non-synonymous and synonymous mutations in parallel. Our results show that point mutations are more common at C:G than at A:T. For non-synonymous mutations, 41% are C:G→A:T transversions, while 27% are C:G→T:A transitions. For synonymous mutations the respective numbers are 26% and 61% (Supplementary Fig. 2a). This result indicates that transversion events, leading to non-synonymous mutations, are positively selected for in tumor cells. We then investigated the potential impact of cigarette smoke on the molecular signature by comparing non-synonymous mutations in smokers versus never-smokers. Interestingly, 43% and 13% C:G→A:T transversions are found in smokers and never-smokers respectively, even though the rates of transition and transversion at A:T are comparable for both cohorts (Supplementary Fig. 2b). This result supports the notion that C:G→A:T transversion events in non-synonymous mutations are likely induced by carcinogens in smoke and demonstrates that previous exposure to tobacco-borne carcinogens impacts the mutational signature.

Mutational signatures already have been shown to vary in different cancer types and are characterized by specific sequence contexts. Previous studies also showed that C:G→T:A transitions at CpG sites were targets of activated carcinogens in gastric and colon cancers. We expanded our signature analysis to measure all 12 possible changes of the transcribed strand in various 5' and 3' sequence contexts and showed that a G→T transversion of the transcribed strand with a 5' flanking T and a 3' flanking G is the most commonly observed molecular change in lung cancer. This is followed by a G→T transversion with a 5' G and a 3' T (Supplementary Table 4a). Our results also showed that transition and transversion events at CpGs are not preferentially targeted in lung cancer. The sequence contexts for synonymous mutations (Supplementary Table 4b) are used for background mutation rate estimation.

The relatively large sample size used in this study allowed us to compare the mutational signatures of several frequently mutated genes in lung cancer. *KRAS* and *TP53*, already associated with cigarette smoking, are central to the hypothesis that specific carcinogens link nicotine addiction to lung cancer. Our analysis clearly shows that point mutations at C:G are not only most common in *KRAS* and *TP53* but also in three additional highly mutated genes, *STK11*, *NF1*, and *LRP1B* (Supplementary Table 4d). Furthermore, point mutations in those genes often occur at a G residue on the transcribed strand, establishing a positive relationship between cigarette consumption and C:G→A:T transversions in those genes. Our observations are generally consistent with the fact that most activated carcinogens react predominantly at G and that repair of the resulting adducts would be slower on the non-transcribed strand. A contrasting result is found in the mutational signature of *EGFR* where point mutations are found mainly at A:T and the most frequently observed sequence context is an A:T→C:G transversion flanked by 5' G:C

and 3'C:G (Supplementary Table 4d) . Hence, our mutational signature analysis supports the hypothesis that cigarette smoke-borne carcinogens do not induce *EGFR* mutations.

### Statistical analysis of significantly mutated genes

Statistical tests on the observed mutations across samples attempt to identify genes that harbor mutations under selection during tumor development. The general framework is first to estimate a background mutation rate,  $\rho$ , based on mutations that were not under selection and then identify genes mutated beyond this rate. It is widely presumed that non-synonymous mutations can be under selection pressure because of their resultant changes to protein sequence and function, while synonymous mutations are not selected against because they are generally considered to be biologically silent. However, they have been implicated to have deleterious effects in some cases<sup>6-9</sup>. This premise provides several convenient bases for estimating  $\rho$ , including data-driven methods and methods that use prior knowledge about highly mutable sequence contexts (Supplementary Tables 4&5 and Supplementary Information). The resulting estimates of background mutation rate ranged between 2.98e-6 and 3.30e-6. These estimates do not account for possible non-synonymous mutations that arrest cell growth, which are presumably under negative selection during carcinogenesis. Consequently, the actual rate could be lower, meaning our analysis is conservative.

Statistical treatments and analyses of cancer sequencing results are not yet standardized. There are several important aspects of this problem, each of which can be addressed in a number of possible ways. Here, we describe several procedures for each of the 3 sub-problems: background mutation rate estimation, significance testing, and error analysis. (Of course, we realize additional methods are possible.) We then describe the 3 overall approaches (out of the many possible combinations of the above) that we used for analysis.

#### **(i)Background mutation rate estimation**

The number of somatic mutations in each tumor varies widely among the 188 tumors. Across the 623 sequenced genes, 25 tumors had no somatic mutations in the genes we assayed, while others contain exceptionally large numbers of mutations (Fig. 4). We calculated the synonymous mutation rate as the maximum likelihood ratio of the 108 silent mutations in 188 samples encompassing 95,738,393 covered bases over 250 genes. This yields  $\rho_{SN} = 1.128e-06$ . The 95% Wilson confidence interval is 0.93e-06 to 1.36e-06. (The Wilson interval is preferable to the traditional Wald interval for low values (see e.g. L.D. Brown, T.T. Cai, A. DasGupta (2001) "Interval Estimation for a Binomial Proportion" *Statistical Science*, 16(2) 101-133.)

The non-synonymous background rate  $\rho_{NS}$  is due to *passenger* non-synonymous mutations, whose number is obviously not known. We can estimate  $\rho_{NS}$  in an expected-value context according to  $\rho_{NS} = \rho_{SN} \times R$ , where  $R$  is the ratio of NS to SN changes.  $R$  is calculated by examining all possible residue changes for a single mutation based on the codon usage in all genes sequenced in this study. More specifically, each nucleotide of each codon was mutated *in silico* to determine whether a particular change would result in a NS or SN alteration. While this process is straightforward, the choice of how to

weight each hypothetical NS or SN alteration is less clear. An obvious basis for weighting is the sequence-context based mutation spectra for synonymous mutations observed in lung adenocarcinoma (Supplementary Table 4b). However, there are numerous reasonable methods for choosing the specific weights, all of which lead to some amount of variation in the final estimate of  $\rho_{NS}$ . We will describe four possible methods here, along with some caveats for each. These methods can be thought of as hierarchical in the sense that they involve increasing degrees of merging context information. (This is quite analogous, for instance, to chi-square testing when there are too few data for the initial number of categories, requiring some categories to be merged.) For example, if we consider the influence of just the two adjacent bases, Supplementary Table 4b represents the extreme case of maximizing the “resolution” of context information. Sampling zeros and data sparseness, along with the possibility that the strictly-synonymous context information itself could bias the result toward synonymous changes, raises the additional possibility of including a carefully chosen number of non-synonymous mutations, as well. (This is something of a “bootstrap” method.)

- (1) Direct Weighting: Weight each alteration directly according to its frequency in Supplementary Table 4b ( $R = 2.41$ ,  $\rho_{NS} = 2.72e-06$ ). The large number of sampling zeros and low integer cell values imply unacceptably large error bars, rendering this method of little practical use. Additional data could remedy this problem.
- (2) Uniform Weighting: At the opposite extreme, we could instead give uniform weight to all alterations ( $R = 3.38$ ,  $\rho_{NS} = 3.81e-06$ ), but this entirely overlooks differences in context that we know actually exist in these data.
- (3) Data-Driven Weighting: Use a data-driven approach to collapse categories in Supplementary Table 4b based on using Fisher’s exact test. Specifically, we are doing 2X3 table where the two columns are the two contexts being tested and the three rows represent the three possibilities of any bases could be mutated. The test evaluates whether there is enough information between two different contexts (where a “context” consists of 2 specific flanking nucleotides) of cells to consider them “statistically distinct”, whereby they are not collapsed. If there is not enough information to distinguish the contexts, they are collapsed into a single one. For example, if A:A and A:C are the contexts (where the colon is the intervening base position whose mutations are being examined), then the collapsed context would be A:AC. In other words, the downstream flanking base would be either A or C, if there is insufficient information to statistically distinguish A:A from A:C. The collapsing process continues until no further moves can be made within a user-chosen significance threshold. This approach is supposed to provide a non-biased pruning of categories without having to make *ad hoc* assumptions. In addition to the 108 synonymous mutations mentioned above, we included 156 non-synonymous point mutations in this process that we reasonably felt were non-driver occurrences. Specifically, they were picked from genes that had only single non-synonymous events. For a threshold of 5%, we obtain the 18 sequence context categories shown in Supplementary Table 5a. The overall ratio  $R=2.645$  was obtained by concatenating all gene sequences for analysis, while still observing proper context at exon boundaries. This resulted in an overall non-

synonymous rate estimate of  $\rho_{NS} = 2.98e-06$ . Gene-specific  $R$  values and their subsequent non-synonymous rates were obtained by running the same calculation method on individual genes (Supplementary 5b).

- (4) **Prior Knowledge Weighting:** Take prior knowledge and additional biological intuition into account to collapse categories in Supplementary Table 5c. For example, it is well-known that CpG dinucleotides have elevated mutation rates (> 16 fold higher than A's and T's) due to cytosine deamination. Consequently, any C or G appearing in CpG is assigned a particular weight. Similarly, we assign weights to C or G not in CpG and to any A or T. Here, we used the 108 synonymous mutations discussed above, but we again relaxed the restriction on non-synonymous mutations slightly. That is, we included non-synonymous events from those genes not in the list of top 100 mutated genes (sorted by number of mutations per covered bases), which allows inclusion of indels, as there are no silent indel mutations. The resulting 4 categories are summarized in Supplementary Table 5c. The relative mutation rates are then determined directly from these data and are subsequently used as multipliers for their respective raw *in silico* mutation tallies. Finally, the resulting grand totals for non-synonymous and synonymous tallies lead to a ratio of  $R = 2.93$  and a non-synonymous rate of  $\rho_{NS} = 3.30e-06$ .

Although we feel the two latter methods described above are an improvement over those adopted in the past, background rate estimation is clearly still something of an art. For example, neither accounts for possible non-synonymous mutations that arrest cell growth. These are presumably under negative selection during carcinogenesis. Consequently, the actual rate could be lower, meaning our analysis is conservative.

## (ii) Significance Testing

We used three statistical methods for testing, all based on the nature of mutation, i.e. a base position is either mutated, or it is not mutated. Each is described briefly:

- (1) **Standard Test:** This approach treats all mutations equally. Given a uniform probability for each position in a gene, a one-tailed binomial test was used to assess whether the observed mutation rate was significantly higher than the background mutation rate. Here, P values were obtained directly from the binomial distribution (W. Feller (1968) *An Introduction to Probability Theory and Its Applications*, John Wiley and Sons). One set of results shown in Supplementary Table 6a use this standard binomial test based on the overall mutation rate of  $2.98e-06$ , as described above.
- (2) **Gene-Specific Test:** We also applied the method of the standard test, except where we used gene-specific background rates instead of a single, global rate. These results are furnished in Supplementary Table 6a, as well.
- (3) **Category Test:** Score mutations according to prevalence. This test is based on the four sequence mutation categories mentioned above (mutated C or G in a CpG dinucleotide, any other mutated C or G, any mutated A or T, and indel). In short,

convolution is used on the category-specific binomials to obtain an overall P-value<sup>10</sup> (see Appendix A). Using the category-based overall rate of 3.30e-06, this test yielded a third list of significantly mutated genes (Supplementary Table 6a).

In all three of these scenarios, we are testing multiple hypotheses (one per gene). Therefore, we control the false discovery rate using the standard Benjamini and Hochberg False Discovery Rate (FDR) procedure. We used an FDR cutoff of 0.1 which bounds the expected fraction of false positives at 10%.

### **(iii) Error Analysis**

Error analysis is important in any problem where only a single, main analysis method is used because it is typically the only avenue for assessing uncertainty. As with the above issues, there are many possibilities for handling this aspect of the problem.

- (1) No formal error handling. Use calculated values of background rate exclusively. Usually, this is acceptable only if an alternate method of assessing accuracy is available, for example using several independent testing methods.
- (2) Determine confidence intervals, say at 95%, and re-calculate results at low and high values. In this particular problem, this involves estimating not only the intervals on the synonymous rate and the NS/SN ratio, but also subsequently using error propagation analysis to arrive at an overall interval.
- (3) Use Monte Carlo methods to sample the distribution of possible background rates and assess error from sampling statistics.

### **(iv) Main Methods Used for Analysis**

It is easy to see from the above that there are many possibilities for an overall statistical method and that these span various levels of sophistication. We chose 3 of these methods for analyzing our results.

- (1) Data-driven weighting to determine background mutation rate with the standard binomial test for assessing statistical significance
- (2) Data-driven weighting using the gene-specific significance test
- (3) Prior-knowledge weighting using the category-specific test

The first two methods are related, while the third is clearly independent of the others. This observation, coupled with the fact that the resulting analyses from the three methods are quite similar, suggested placing somewhat less emphasis on an extremely formalized error analysis. For example background rates from the data-driven and prior-knowledge

approaches,  $2.98e-06$  and  $3.30e-06$  respectively, are quite close in value. In fact, when considering statistical uncertainty, their ranges overlap substantially. For example, the 95% confidence interval on the latter value,  $2.56e-06 < \rho_{NS} < 4.04e-06$  includes the lower estimate by a large margin. This suggested using these two background rates to directly assess rate sensitivity *in lieu* of using confidence intervals on just a single rate.

### Distribution of non-synonymous mutations in protein functional domains

We further characterized the distribution of non-synonymous mutations in protein functional domains and found that 645 mutations were within known conserved Pfam domains. An examination of the various functional domains within those driver genes found non-uniform mutation rates, but when we compared the protein domain mutation rates against the estimated background genomic mutation rate, we found that the RAS (71 mutations), P53 DNA binding (54 mutations), protein tyrosine kinase (104 mutations), protein kinase (103 mutations), and protein phosphatase (7 mutations) domains comprised the top mutated driver protein domains. In addition, fibronectin type III repeat domain (fn3, 25 mutations), Furin-like cysteine rich region (involved in receptor aggregation, 8 mutations), and receptor\_L\_binding domains (16 mutations) also had mutation rates significantly above background (Supplementary Table 6b). This result suggests that mutations within a group of functional domains are positively selected during carcinogenesis and are excellent candidate mutations for therapeutics.

### Concurrence and mutual exclusion analysis

Positive correlations between mutations in two genes across tumors may suggest that the mutations (and their associated pathways) function synergistically to promote carcinogenesis, while negative correlation of mutations in two genes may imply that the alteration of either gene (or its associated pathway) is sufficient, wholly or in part, for carcinogenesis. We performed two slightly different permutation tests for mutation correlation between genes (i.e. concurrence or exclusion of mutations). In both tests, we take inter-individual differences of gene mutation prevalence into consideration. FDR corrections have been applied (Supplementary Table 7a-c).

Test 1: we kept the number of samples mutated in a given gene and the number of genes mutated in a given sample the same as observed in the data and randomly permuted the observed mutations across samples and genes. For each permutation, we recorded the number of samples with concurrent and exclusive mutations ( $X_c$  and  $X_e$ , respectively) for each pair of genes and compared them with the numbers observed in the original data ( $N_c$  and  $N_e$ ). We repeated this process 10,000,000 times and summarize the frequencies of  $X_c \geq N_c$  and  $X_e \geq N_e$ , respectively. These frequencies are used as empirical p-values under the null hypothesis (no correlation between genes) (Supplementary Table 7a & 7b).

Test 2: we kept the number of mutations in a given gene and sample the same as observed in the data and randomly permuted the observed mutations across samples and genes. The rest of the analysis is the same as above and we performed 1,000,000 permutations (Supplementary Table 7c).

### Analysis of significantly mutated pathways

We examined the distribution of mutations found in the 623 TSP genes within KEGG pathways (release 45). KEGG pathway maps are hierarchically classified, having 5 categories in the top level, 24 subcategories in the second, and 215 individual pathways in the third. We mapped TSP genes to KEGG pathways both by blast (cutoff:  $P\_value \leq e-10$ ) and by name matching and were able to place 389 genes onto the pathways. NF1 and KRAS were added to the mTOR pathway based on the literature. We used two approaches to test mutation association on all three levels and to determine whether the genes within specific pathways were mutated more often than the genes outside of the pathways. We evaluated the total number of mutations from all genes examined within each pathway, the number of genes mutated, and the total sequenced coding length of genes in all 188 tumors in the pathway.

In one approach, we created a two-way contingency table by counting mutations in all tested genes within and outside of the pathway. Fisher's exact test was then performed to assess significance of pathway mutation enrichment (Supplementary Table 12).

In another approach, we counted both the total number of base pairs within each pathway that were successfully sequenced and the total number of NS mutations observed in each pathway. A one-tailed binomial test was again performed to check for significance of the observed mutation rate in the pathway. The Benjamini and Hochberg False Discovery Rate and Bonferroni correction procedures were applied according to the total number of pathways tested (Supplementary Table 12). Of those pathways deemed to be significant by this process, we further assessed significance in terms of the number of mutated genes. This step disqualifies pathways having just one or two highly-mutated genes.

## Section IV. Integrated analyses – mutation, copy number, gene expression, and clinical features

### SNP array data pre-processing

The dChip software was used to read Affymetrix 250k Sty array CEL files and to export background-subtracted probe values using the PM-only option. For each probe set (i.e. each SNP), the  $\log_2$  value of the average of PM intensities across 12 probes was used as the basic measurement,  $S$ . For each array,  $S$  values for 238,304 SNPs were scaled to have a mean of 0 and a variance of 1 by normalization. For each SNP and each sample pair, DNA copy number was estimated based on the difference of  $S$  between tumor and normal samples (i.e. the  $\log_2$  ratio of the tumor and normal intensities).

### Gene-based DNA copy number analyses

For genes having greater than 10 SNPs, all SNPs within the gene were used to compute the gene's copy number. For genes with fewer than 10 SNPs, the average intensity of the 10 SNPs closest to the most centrally localized SNP, within or outside of the gene, was used to calculate the copy number. This approach minimizes the risk of higher variability associated with a small number of SNPs. DNA copy numbers are log transformed for plotting.

### Tumor RNA extraction and gene expression array and data analysis

For each tumor RNA used for expression analysis, serial 50  $\mu\text{m}$  frozen tissue sections were homogenized in Trizol reagent and used for RNA isolation according to the manufacturer's protocol. An H/E stained serial section from each tumor was reviewed to ensure representation of at least 70% neoplastic cellularity. Isolated RNA was quantified by Nanodrop fiberoptic spectrophotometry and RNA integrity was assessed using Agilent Bioanalyzer and RNA Nano assay. One  $\mu\text{g}$  of total RNA was converted to biotinylated cRNA using the Affymetrix single cycle target preparation method, following the manufacturer's protocol and standard reagents. Biotinylated cRNA was fragmented and hybridized to Affymetrix U133Plus2 human GeneChip expression microarrays following the manufacturer's recommendations. Arrays were washed, stained, and scanned using standard protocols. All target preparation and array hybridization was performed by the Siteman Cancer Center GeneChip facility. Data quality of each array was assessed by reviewing internal poly-A control probe sets and 3':5' probe intensity signal ratios for housekeeping genes. Arrays which passed all QC metrics were transferred to the Siteman Cancer Center Bioinformatics Core at Washington University for data annotation and distribution. The gene expression data were preprocessed using MAS 5.0. Then, the gene expression levels were log transformed and the mean value across all samples was subtracted. The resulting values were divided by standard deviation to obtain normalized gene expression values. The average value was used where multiple probes were available, and the single value was used when only a single probe was available for a given gene.



### DNA copy number and Gene expression correlation analysis

To detect the association between DNA copy number and expression level of each gene, Pearson's correlation coefficients and P-values were calculated. Standard FDR and Bonferroni corrections were applied.

### DNA copy number and gene expression

Our previous study described the DNA copy number analysis for TSP tumors based on SNP array data<sup>11</sup>. In this study, RNAs from 75 tumor samples were hybridized to the Affymetrix U133Plus2 gene expression array (see Methods). Further pathological analysis suggests that 7 out of 75 tumors are not typical lung adenocarcinomas and likely belong to other types of lung cancers. Statistically significant correlation (FDR < 0.05) between DNA copy number and gene expression level was observed for 2,112 of the 8,046 genes examined. The distribution of Pearson correlation coefficients between DNA copy number and gene expression is shown in supplementary Fig. 3. Further analysis identified 2,096 genes with positive correlation and only 16 genes with negative correlation between DNA copy number and gene expression level. The causes of expression change for many genes in cancer cells are still largely unknown. Our analysis suggests that DNA copy number alterations may be an important factor for driving altered gene expression in lung adenocarcinoma. Notable examples having strong correlation are the adjacent genes *ANKRD10* and *ING1*, two cyclin-dependant kinases *CDK6* and *CDK8*, PIK3 kinase *PIK3CA*, cyclin *CCNE1*, and the zinc finger protein *MYNN* (Supplementary Table 9a). *CDK8* has been shown as a colorectal cancer oncogene that regulates b-catenin activity (Nature, in press). Strong positive correlations also have been found in highly mutated genes such as *NF1*, *KRAS*, *EGFR*, *APC*, and *RBI* (Supplementary Table 9b). Interestingly, we have also identified genes showing discordant changes between DNA copy number and gene expression (data not shown). Notably, several members of the melanoma antigen (*MAGE*) and solute carrier families, having minimal copy number variations, showed drastic gene expression changes across 75 lung adenocarcinoma tumor samples. This is consistent with the notion that regulation of gene expression is a complex process that can be controlled at several steps and by multiple mechanisms in cancer. Besides copy number changes, changes in methylation status, transcription regulation, transcript stability and many other factors can have a significant impact on the gene expression levels in lung cancer cells.

### Correlation between mutation and gene expression

To detect the association between gene expression and mutation of each gene, Pearson's correlation coefficient and P-values were calculated. Standard FDR and Bonferroni corrections were applied.

### Correlation between mutation and DNA copy number

To detect the association between DNA copy number and mutation of each gene, Pearson's correlation coefficient and P-values were calculated. Standard FDR and Bonferroni corrections were applied.

### Correlation between mutation and clinical association analysis

Each gene of each sample was assigned either 1 or 0 according to whether it harbored any mutations. For any two genes, a two-way table was obtained by counting the numbers of 0 and 1 entries over the entire sample set, after which Fisher's exact test was performed to determine their mutation correlation. To establish correlations between mutations and clinical features, Pearson's correlation coefficient and Fisher's exact test were applied (quantitative and qualitative clinical traits, respectively).

## B. Supplementary Figures

Supplementary Fig. 1

**Shared and Center-Specific Genes**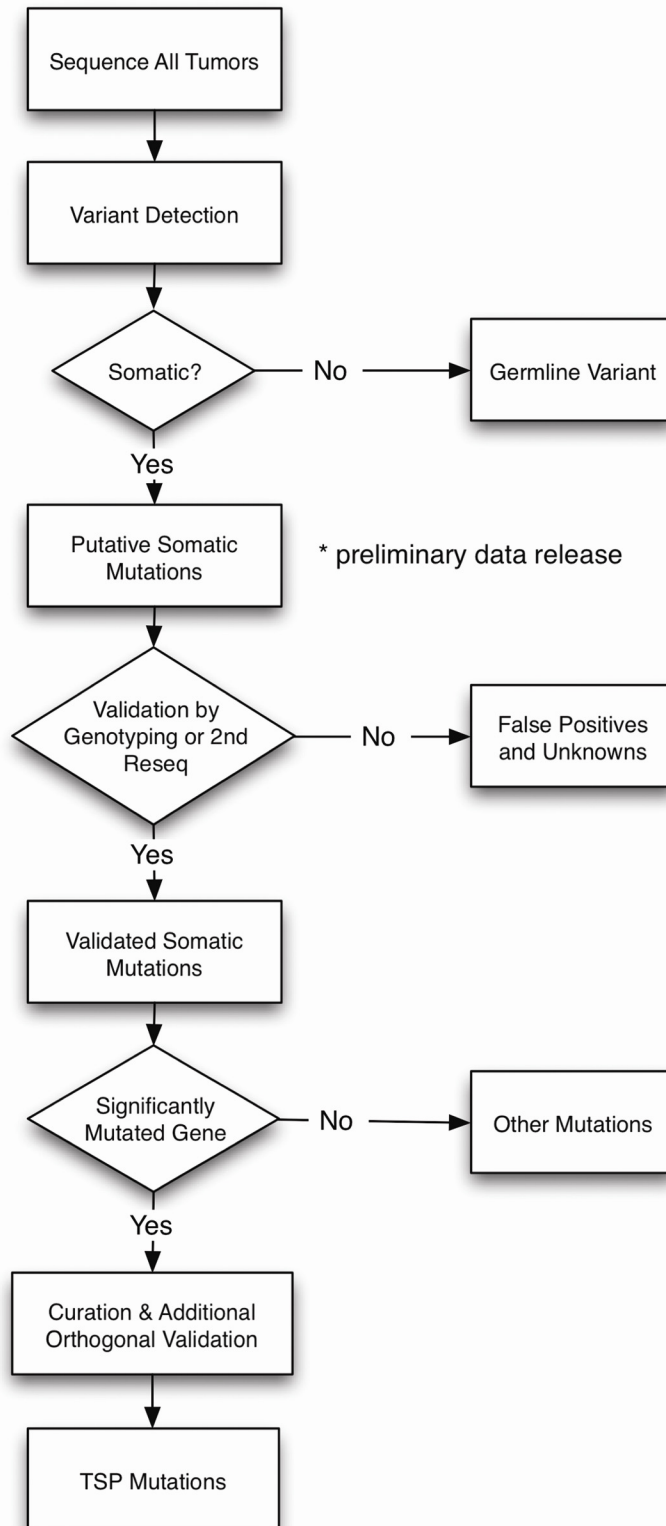

Supplementary Fig. 2

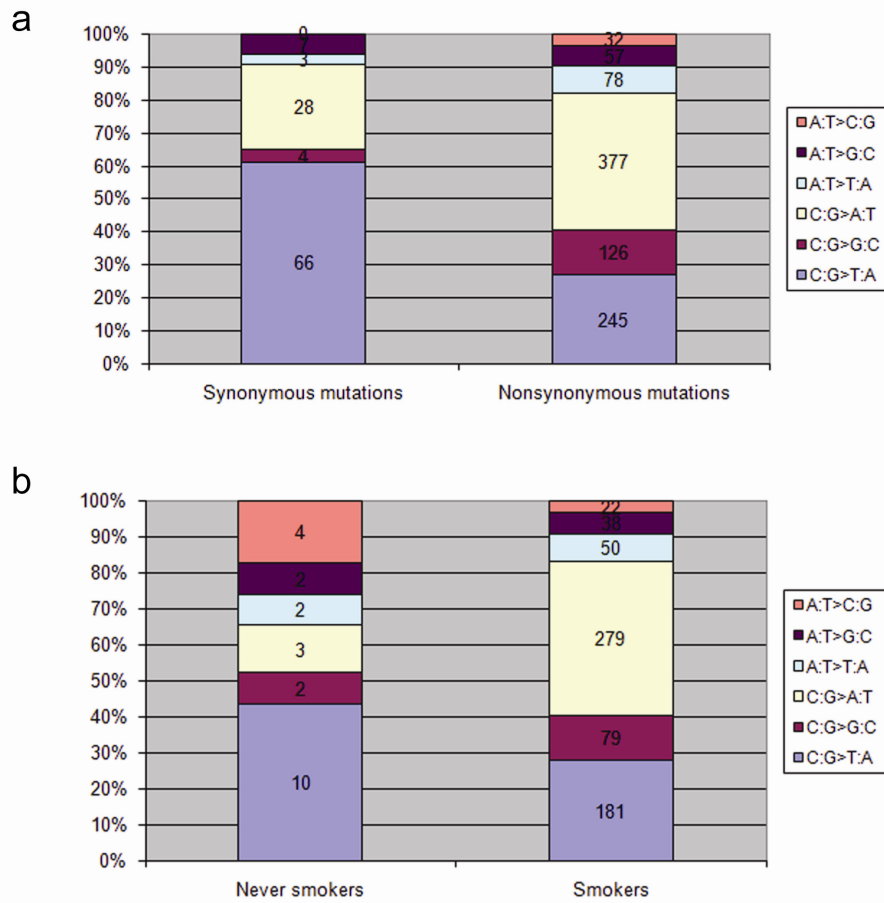

Supplementary Figure 3

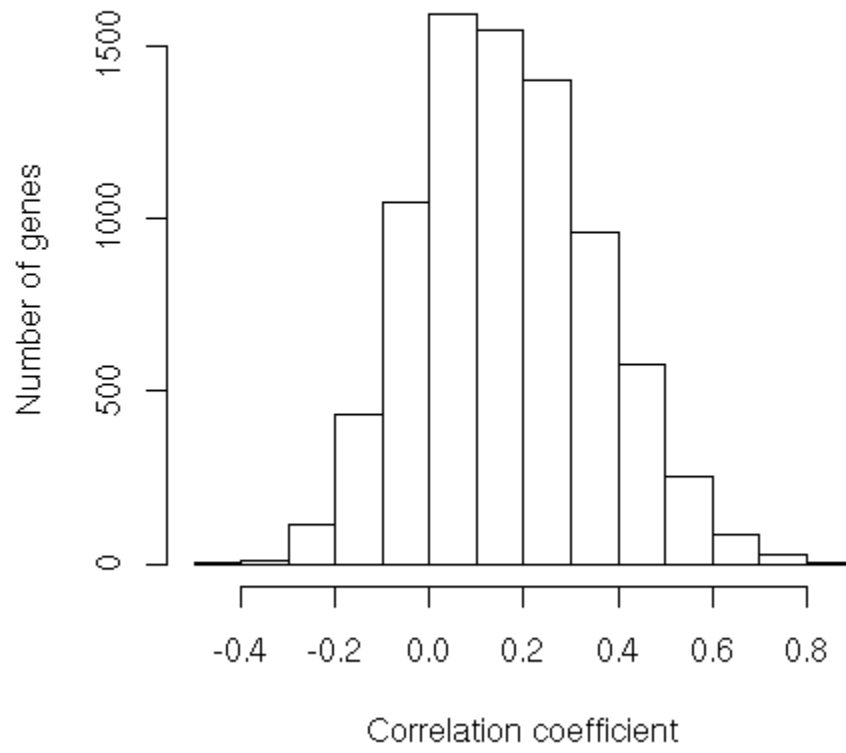

Supplementary Fig. 4

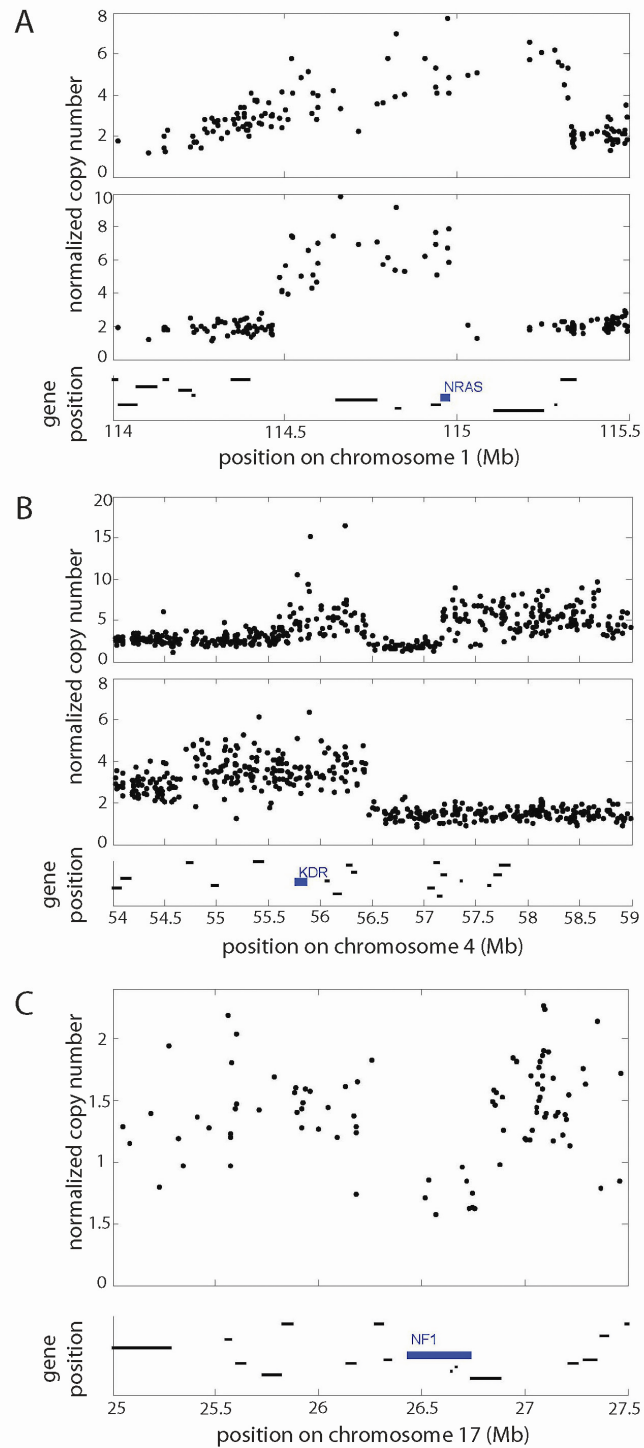

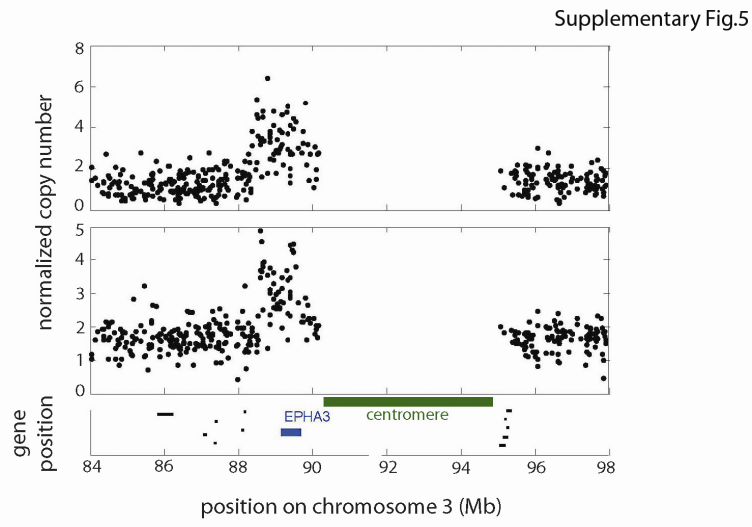



Supplementary Fig. 6

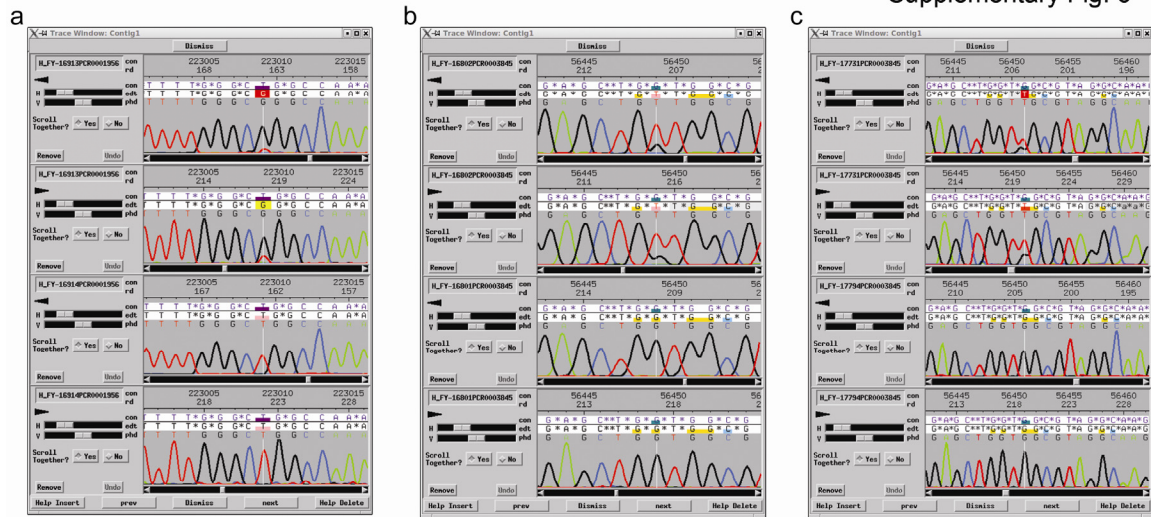

Tumor 16913: amplification of L858R mutant allele  
Matched normal 16914

Tumor 16802: amplification of G12V mutant allele  
Matched normal 16801

Tumor 17731: amplification of G13C mutant allele  
Matched normal 17794

Supplementary Fig. 7

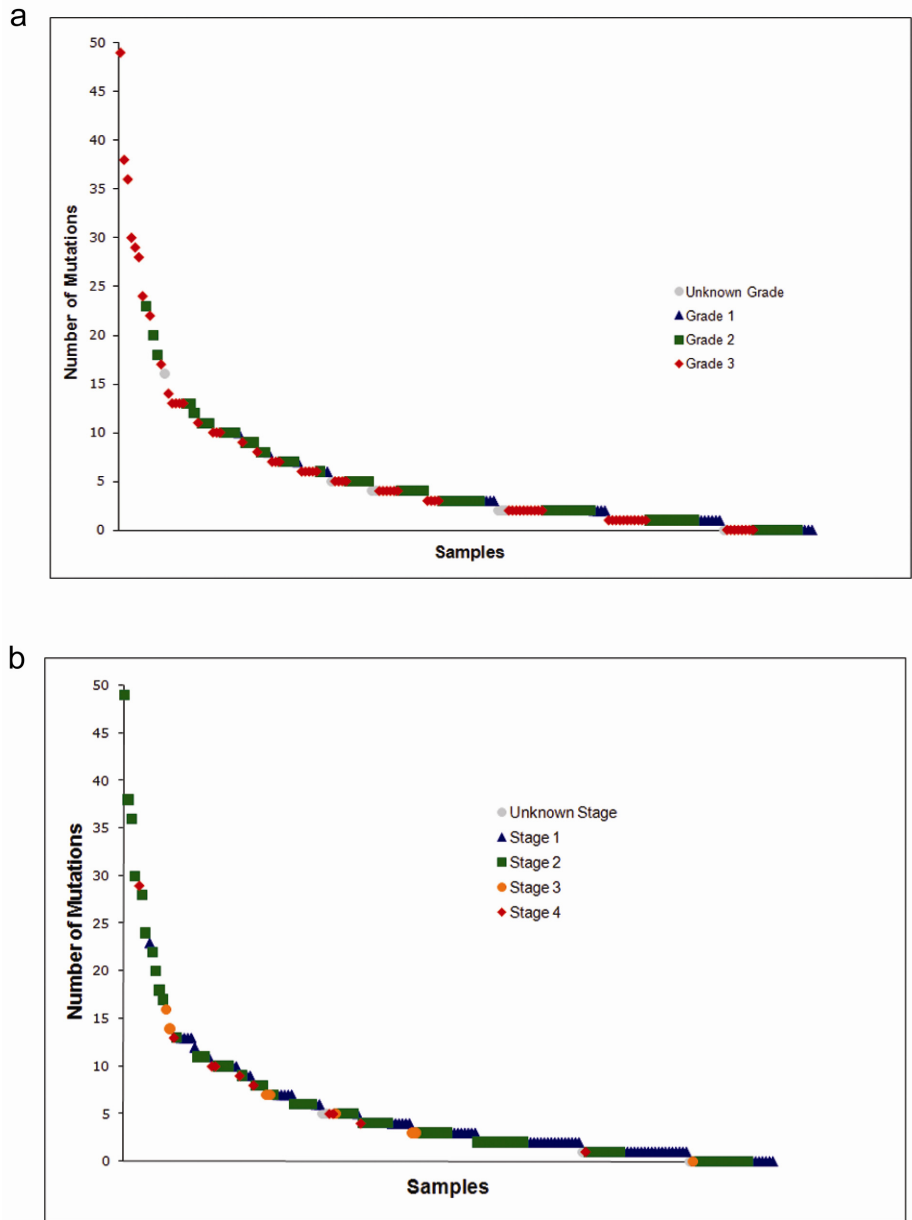

## C. Supplementary Figure Legends

Supplementary Figure 1. Sequencing and mutation detection flow chart. 188 primary lung adenocarcinoma samples were screened for mutations in the coding exons as well as splice donor and acceptor sites of 623 human genes. Detected putative somatic mutations were subjected to verification (2<sup>nd</sup> round of PCR amplification and sequencing), orthogonal validation, and manual review.

Supplementary Figure 2. Mutational signatures in lung adenocarcinoma. a) For non-synonymous mutations, 41% are C:G→A:T transversions, while 27% are C:G →T:A transitions. For synonymous mutations the respective numbers are 26% and 61%. This result suggests that C:G→A:T transversion events, leading to non-synonymous mutations, are positively selected for in tumor cells. b) 43% and 13% C:G→A:T transversions are found in smokers and never smokers respectively, suggesting that C:G→A:T transversion events in non-synonymous mutations are likely induced by carcinogens in smoke.

Supplementary Figure 3. Statistical analysis of correlation between DNA copy number alterations and gene expression changes in 75 lung adenocarcinoma samples.

Supplementary Figure 4. Focal copy number changes of significant genes in primary lung adenocarcinoma samples described in Weir et al. A, focal amplifications of *NRAS*. Upper panel, sample Daffy35T. Lower panel, sample Daffy20T. B, focal amplifications of *KDR*. Upper panel, sample 17048. Lower sample, Daffy93T. C, focal deletion in *NFI* in sample Daffy85T. Mutated genes of interest are indicated by blue bars in the figure; locations of neighboring genes indicated by black bars.

Supplementary Figure 5. Focal amplifications of *EPHA3*. Two primary lung adenocarcinoma samples from the set described in Weir et al.<sup>11</sup> show high-level, focal amplification of the *EPHA3* gene, indicated by a blue bar on the figure, as assessed by Affymetrix 250K StyI SNP array data. The positions of neighboring genes are indicated by black bars. The green bar indicates the location of the centromere of chromosome 3. Upper panel, sample 16678. Lower panel, sample 99-43.

Supplementary Figure 6. Lung adenocarcinomas display amplification of mutant alleles of *EGFR* and *KRAS*.

Supplementary Figure 7. Mutation distributions in individual cancer genomes. a) Tumors with higher grade displayed a higher mutation rate than tumors from lower grade. b) Tumors with higher stage displayed a higher mutation rate than tumors from lower stages.

## D. Supplementary Tables

Supplementary Table 1. Protein family/domain and GO ontology analysis for the 623 TSP genes.

| Gene/Transcript           | GO         | HMMPfam               | Superfamily                                      | Center |
|---------------------------|------------|-----------------------|--------------------------------------------------|--------|
| AADAC/ENST00000232892     |            | HMMPfam_Abhydrolase_3 | superfamily_alpha/beta-Hydrolases                | WU     |
| AATK/OTTHUMT00000256055   | GO:0004713 | HMMPfam_Pkinase_Tyr   | superfamily_Protein kinase-like (PK-like)        | WU     |
| ABL1/ENST00000372348      | GO:0007242 | HMMPfam_F_actin_bind  | superfamily_Protein kinase-like (PK-like)        | WU     |
|                           | GO:0004713 | HMMPfam_Pkinase_Tyr   | superfamily_SH2 domain                           |        |
|                           |            | HMMPfam_SH2           | superfamily_SH3-domain                           |        |
|                           |            | HMMPfam_SH3_1         |                                                  |        |
| ABL2/ENST00000367623      | GO:0007242 | HMMPfam_F_actin_bind  | superfamily_Protein kinase-like (PK-like)        | Broad  |
|                           | GO:0004713 | HMMPfam_Pkinase_Tyr   | superfamily_SH2 domain                           |        |
|                           |            | HMMPfam_SH2           | superfamily_SH3-domain                           |        |
|                           |            | HMMPfam_SH3_1         |                                                  |        |
| ACTR2/ENST00000377982     | GO:0005515 | HMMPfam_Actin         | superfamily_Actin-like ATPase domain             | Broad  |
| ACVR1/ENST00000263640     | GO:0004672 | HMMPfam_Activin_recp  | superfamily_Protein kinase-like (PK-like)        | WU     |
|                           | GO:0004675 | HMMPfam_Pkinase       | superfamily_Snake toxin-like                     |        |
|                           |            | HMMPfam_TGF_beta_GS   |                                                  |        |
| ACVR1B/ENST00000257963    | GO:0004672 | HMMPfam_Activin_recp  | superfamily_Protein kinase-like (PK-like)        | Broad  |
|                           | GO:0004675 | HMMPfam_Pkinase       | superfamily_Snake toxin-like                     |        |
|                           |            | HMMPfam_TGF_beta_GS   |                                                  |        |
| ACVR1C/ENST00000243349    | GO:0004672 | HMMPfam_Activin_recp  | superfamily_Protein kinase-like (PK-like)        | WU     |
|                           | GO:0004675 | HMMPfam_Pkinase       | superfamily_Snake toxin-like                     |        |
|                           |            | HMMPfam_TGF_beta_GS   |                                                  |        |
| ACVR2B/ENST00000352511    | GO:0004672 | HMMPfam_Activin_recp  | superfamily_Protein kinase-like (PK-like)        | WU     |
|                           | GO:0004675 | HMMPfam_Pkinase       | superfamily_Snake toxin-like                     |        |
| ACVRL1/OTTHUMT00000260987 | GO:0004672 | HMMPfam_Activin_recp  | superfamily_Protein kinase-like (PK-like)        | Broad  |
|                           | GO:0004675 | HMMPfam_Pkinase       | superfamily_Snake toxin-like                     |        |
|                           |            | HMMPfam_TGF_beta_GS   |                                                  |        |
| ADRBK1/ENST00000308595    | GO:0004672 | HMMPfam_PH            | superfamily_PH domain-like                       | Broad  |
|                           | GO:0004871 | HMMPfam_Pkinase       | superfamily_Protein kinase-like (PK-like)        |        |
|                           |            | HMMPfam_RGS           | superfamily_Regulator of G-protein signaling RGS |        |
| ADRBK2/ENST00000324198    | GO:0004672 | HMMPfam_PH            | superfamily_PH domain-like                       | Broad  |
|                           | GO:0004871 | HMMPfam_Pkinase       | superfamily_Protein kinase-like (PK-like)        |        |
|                           |            | HMMPfam_RGS           | superfamily_Regulator of G-protein signaling RGS |        |

|                         |                                        |                                                                                                                |                                                                                                              |       |
|-------------------------|----------------------------------------|----------------------------------------------------------------------------------------------------------------|--------------------------------------------------------------------------------------------------------------|-------|
| AKT1/ENST00000349310    | GO:0004672<br>GO:0004674               | HMMPfam_PH<br>HMMPfam_Pkinase<br>HMMPfam_Pkinase_C                                                             | superfamily_PH domain-like<br>superfamily_Protein kinase-like (PK-like)                                      | SHARE |
| AKT2/ENST00000311278    | GO:0004672<br>GO:0004674               | HMMPfam_PH<br>HMMPfam_Pkinase<br>HMMPfam_Pkinase_C                                                             | superfamily_PH domain-like<br>superfamily_Protein kinase-like (PK-like)                                      | SHARE |
| AKT3/ENST00000366539    | GO:0004672<br>GO:0004674               | HMMPfam_PH<br>HMMPfam_Pkinase<br>HMMPfam_Pkinase_C                                                             | superfamily_PH domain-like<br>superfamily_Protein kinase-like (PK-like)                                      | SHARE |
| ALK/ENST00000389049     | GO:0016020<br>GO:0004713               | HMMPfam_MAM<br>HMMPfam_Pkinase_Tyr                                                                             | superfamily_EGF/Laminin<br>superfamily_LDL receptor-like module<br>superfamily_Protein kinase-like (PK-like) | Broad |
| ALS2CR2/ENST00000194530 | GO:0004672                             | HMMPfam_Pkinase                                                                                                | superfamily_Protein kinase-like (PK-like)                                                                    | Broad |
| ALS2CR7/ENST00000260967 | GO:0004672                             | HMMPfam_Pkinase                                                                                                | superfamily_Protein kinase-like (PK-like)                                                                    | Broad |
| AMHR2/ENST00000257863   | GO:0004672                             | HMMPfam_Pkinase                                                                                                | superfamily_Protein kinase-like (PK-like)<br>superfamily_Snake toxin-like                                    | Broad |
| ANKK1/ENST00000303941   | GO:0004672                             | HMMPfam_Ank<br>HMMPfam_Pkinase                                                                                 | superfamily_Ankyrin repeat<br>superfamily_Protein kinase-like (PK-like)                                      | Broad |
| APC/ENST00000257430     | GO:0005515<br>GO:0000074               | HMMPfam_APC_15aa<br>HMMPfam_APC_basic<br>HMMPfam_APC_crr<br>HMMPfam_Arm<br>HMMPfam_EB1_binding<br>HMMPfam_SAMP | superfamily_ARM repeat                                                                                       | Broad |
| ARAF/ENST00000377045    | GO:0007242<br>GO:0004672<br>GO:0005057 | HMMPfam_C1_1<br>HMMPfam_Pkinase<br>HMMPfam_RBD                                                                 | superfamily_Cysteine-rich domain<br>superfamily_Protein kinase-like (PK-like)<br>superfamily_Ubiquitin-like  | SHARE |
| ARMET/ENST00000273628   |                                        |                                                                                                                | superfamily_Saposin                                                                                          | WU    |
| ATM/ENST00000278616     | GO:0016773                             | HMMPfam_FAT<br>HMMPfam_FATC<br>HMMPfam_PI3_PI4_kinase                                                          | superfamily_ARM repeat<br>superfamily_Protein kinase-like (PK-like)                                          | Broad |
| ATR/ENST00000383103     | GO:0016773                             | HMMPfam_FATC<br>HMMPfam_HEAT                                                                                   | superfamily_ARM repeat<br>superfamily_Protein kinase-like (PK-like)                                          | Broad |

|                          |                                                                                                                                                                                    |                                                                   |                                                                                                                                       |       |
|--------------------------|------------------------------------------------------------------------------------------------------------------------------------------------------------------------------------|-------------------------------------------------------------------|---------------------------------------------------------------------------------------------------------------------------------------|-------|
|                          |                                                                                                                                                                                    | HMMPfam_PI3_PI4_kinase<br>HMMPfam_UME                             | superfamily_TPR-like                                                                                                                  |       |
| AURKB/OTTHUMT00000285841 | GO:0004672                                                                                                                                                                         | HMMPfam_Pkinase                                                   | superfamily_Protein kinase-like (PK-like)                                                                                             | Broad |
| AURKC/ENST00000302804    | GO:0004672                                                                                                                                                                         | HMMPfam_Pkinase                                                   | superfamily_Protein kinase-like (PK-like)                                                                                             | Broad |
| AXL/ENST00000301178      | GO:0004713                                                                                                                                                                         | HMMPfam_I-set<br>HMMPfam_Pkinase_Tyr<br>HMMPfam_fn3<br>HMMPfam_ig | superfamily_Fibronectin type III<br>superfamily_Immunoglobulin<br>superfamily_Protein kinase-like (PK-like)<br>superfamily_SH2 domain | WU    |
| BAD/ENST00000309032      | GO:0008632<br>GO:0019221<br>GO:0005737<br>GO:0006007<br>GO:0042593<br>GO:0008624<br>GO:0016020<br>GO:0005741<br>GO:0005739<br>GO:0045579<br>GO:0045582<br>GO:0005515<br>GO:0043281 |                                                                   |                                                                                                                                       | Broad |
| BAGE3/ENST00000335369    |                                                                                                                                                                                    | HMMPfam_BAGE                                                      |                                                                                                                                       | Broad |
| BAGE4/ENST00000335369    |                                                                                                                                                                                    | HMMPfam_BAGE                                                      |                                                                                                                                       | Broad |
| BAP1/ENST00000296288     | GO:0004221                                                                                                                                                                         | HMMPfam_Peptidase_C12                                             | superfamily_Cysteine proteinases                                                                                                      | Broad |
| BARD1/ENST00000260947    | GO:0005622                                                                                                                                                                         | HMMPfam_Ank<br>HMMPfam_BRCT                                       | superfamily_Ankyrin repeat<br>superfamily_BRCT domain<br>superfamily_RING/U-box                                                       | WU    |
| BAX/OTTHUMT00000150522   | GO:0042981                                                                                                                                                                         | HMMPfam_Bcl-2                                                     | superfamily_Bcl-2 inhibitors of programmed cell de                                                                                    | WU    |
| BCL2/ENST00000333681     | GO:0042981                                                                                                                                                                         | HMMPfam_BH4<br>HMMPfam_Bcl-2                                      | superfamily_Bcl-2 inhibitors of programmed cell de                                                                                    | WU    |
| BCL3/OTTHUMT00000150537  |                                                                                                                                                                                    | HMMPfam_Ank                                                       | superfamily_Ankyrin repeat                                                                                                            | WU    |
| BCL6/ENST00000232014     | GO:0003676                                                                                                                                                                         | HMMPfam_BTB<br>HMMPfam_zf-C2H2                                    | superfamily_C2H2 and C2HC zinc fingers<br>superfamily_POZ domain                                                                      | Broad |

|                        |                                        |                                                                                                      |                                                                                                                             |       |
|------------------------|----------------------------------------|------------------------------------------------------------------------------------------------------|-----------------------------------------------------------------------------------------------------------------------------|-------|
| BLK/ENST00000382364    | GO:0007242<br>GO:0004713               | HMMPfam_Pkinase_Tyr<br>HMMPfam_SH2<br>HMMPfam_SH3_1                                                  | superfamily_Protein kinase-like (PK-like)<br>superfamily_SH2 domain<br>superfamily_SH3-domain                               | SHARE |
| BMPR1A/ENST00000372037 | GO:0004672<br>GO:0004675               | HMMPfam_Activin_recp<br>HMMPfam_Pkinase<br>HMMPfam_TGF_beta_GS                                       | superfamily_Protein kinase-like (PK-like)<br>superfamily_Snake toxin-like                                                   | Broad |
| BMPR1B/ENST00000264568 | GO:0004672<br>GO:0004675               | HMMPfam_Activin_recp<br>HMMPfam_Pkinase<br>HMMPfam_TGF_beta_GS                                       | superfamily_Protein kinase-like (PK-like)<br>superfamily_Snake toxin-like                                                   | Broad |
| BMPR2/ENST00000374580  | GO:0004672<br>GO:0004675               | HMMPfam_Activin_recp<br>HMMPfam_Pkinase                                                              | superfamily_Protein kinase-like (PK-like)<br>superfamily_Snake toxin-like                                                   | Broad |
| BMX/ENST00000380391    | GO:0007242<br>GO:0004713               | HMMPfam_BTK<br>HMMPfam_PH<br>HMMPfam_Pkinase_Tyr<br>HMMPfam_SH2                                      | superfamily_PH domain-like<br>superfamily_Protein kinase-like (PK-like)<br>superfamily_SH2 domain                           | WU    |
| BRAF/ENST00000288602   | GO:0007242<br>GO:0004672<br>GO:0005057 | HMMPfam_C1_1<br>HMMPfam_Pkinase<br>HMMPfam_RBD                                                       | superfamily_Cysteine-rich domain<br>superfamily_Protein kinase-like (PK-like)<br>superfamily_Ubiquitin-like                 | SHARE |
| BRAP/ENST00000327551   | GO:0005515<br>GO:0008270               | HMMPfam_BRAP2<br>HMMPfam_zf-C3HC4<br>HMMPfam_zf-UBP                                                  | superfamily_RING/U-box<br>superfamily_RNA-binding domain RBD                                                                | Broad |
| BRCA1/ENST00000357654  | GO:0005622<br>GO:0005515               | HMMPfam_BRCT<br>HMMPfam_zf-C3HC4                                                                     | superfamily_BRCT domain<br>superfamily_RING/U-box                                                                           | Broad |
| BRCA2/ENST00000380152  |                                        | HMMPfam_BRCA-2_OB1<br>HMMPfam_BRCA-2_OB3<br>HMMPfam_BRCA-2_helical<br>HMMPfam_BRCA2<br>HMMPfam_Tower | superfamily_BRCA2 helical domain<br>superfamily_BRCA2 tower domain<br>superfamily_Nucleic acid-binding proteins             | Broad |
| BTK/ENST00000308731    | GO:0007242<br>GO:0004713               | HMMPfam_BTK<br>HMMPfam_PH<br>HMMPfam_Pkinase_Tyr<br>HMMPfam_SH2<br>HMMPfam_SH3_1                     | superfamily_PH domain-like<br>superfamily_Protein kinase-like (PK-like)<br>superfamily_SH2 domain<br>superfamily_SH3-domain | Broad |



|                          |                          |                                                                                         |                                                                                                                                                                                    |       |
|--------------------------|--------------------------|-----------------------------------------------------------------------------------------|------------------------------------------------------------------------------------------------------------------------------------------------------------------------------------|-------|
| BUB1/ENST00000302759     | GO:0004672               | HMMPfam_Mad3_BUB1_I<br>HMMPfam_Pkinase                                                  | superfamily_Protein kinase-like (PK-like)                                                                                                                                          | WU    |
| BUB1B/ENST00000287598    |                          | HMMPfam_Mad3_BUB1_I                                                                     | superfamily_Protein kinase-like (PK-like)                                                                                                                                          | WU    |
| C3orf14/NM_020685        |                          |                                                                                         |                                                                                                                                                                                    | Broad |
| C3orf18/ENST00000357203  | GO:0016021<br>GO:0016020 |                                                                                         |                                                                                                                                                                                    | WU    |
| C3orf45/ENST00000316436  | GO:0016021<br>GO:0016020 |                                                                                         |                                                                                                                                                                                    | WU    |
| CACNA2D2/ENST00000360963 | GO:0016020               | HMMPfam_Cache_1<br>HMMPfam_VGCC_alpha2<br>HMMPfam_VWA<br>HMMPfam_VWA_N                  | superfamily_vWA-like                                                                                                                                                               | WU    |
| CADPS/ENST00000383710    |                          | HMMPfam_C2<br>HMMPfam_DUF1041<br>HMMPfam_PH                                             | superfamily_PH domain-like                                                                                                                                                         | Broad |
| CAMKV/ENST00000389606    | GO:0004672               | HMMPfam_Pkinase                                                                         | superfamily_Protein kinase-like (PK-like)                                                                                                                                          | WU    |
| CASK/ENST00000378163     | GO:0005515<br>GO:0004672 | HMMPfam_Guanylate_kin<br>HMMPfam_L27<br>HMMPfam_PDZ<br>HMMPfam_Pkinase<br>HMMPfam_SH3_2 | superfamily_L27 domain<br>superfamily_P-loop containing nucleoside triphosph<br>superfamily_PDZ domain-like<br>superfamily_Protein kinase-like (PK-like)<br>superfamily_SH3-domain | Broad |
| CBL/ENST00000264033      | GO:0005515<br>GO:0004871 | HMMPfam_Cbl_N<br>HMMPfam_Cbl_N2<br>HMMPfam_Cbl_N3<br>HMMPfam_UBA<br>HMMPfam_zf-C3HC4    | superfamily_EF-hand<br>superfamily_N-terminal domain of cbl (N-cbl)<br>superfamily_RING/U-box<br>superfamily_SH2 domain<br>superfamily_UBA-like                                    | Broad |
| CBLB/ENST00000264122     | GO:0005515<br>GO:0004871 | HMMPfam_Cbl_N<br>HMMPfam_Cbl_N2<br>HMMPfam_Cbl_N3<br>HMMPfam_UBA<br>HMMPfam_zf-C3HC4    | superfamily_EF-hand<br>superfamily_N-terminal domain of cbl (N-cbl)<br>superfamily_RING/U-box<br>superfamily_SH2 domain<br>superfamily_UBA-like                                    | WU    |
| CBLC/ENST00000270279     | GO:0005515<br>GO:0004871 | HMMPfam_Cbl_N<br>HMMPfam_Cbl_N2                                                         | superfamily_EF-hand<br>superfamily_N-terminal domain of cbl (N-cbl)                                                                                                                | WU    |

|                         |            |                                              |                                                    |       |
|-------------------------|------------|----------------------------------------------|----------------------------------------------------|-------|
|                         |            | HMMPfam_Cbl_N3<br>HMMPfam_zf-C3HC4           | superfamily_RING/U-box<br>superfamily_SH2 domain   |       |
| CCNA1/ENST00000255465   | GO:0000074 | HMMPfam_Cyclin_C<br>HMMPfam_Cyclin_N         | superfamily_Cyclin-like                            | Broad |
| CCNA2/ENST00000274026   | GO:0000074 | HMMPfam_Cyclin_C<br>HMMPfam_Cyclin_N         | superfamily_Cyclin-like                            | Broad |
| CCNB3/NM_033031         | GO:0000074 | HMMPfam_Cyclin_C<br>HMMPfam_Cyclin_N         | superfamily_Cyclin-like                            | Broad |
| CCND1/ENST00000227507   | GO:0000074 | HMMPfam_Cyclin_C<br>HMMPfam_Cyclin_N         | superfamily_Cyclin-like                            | Broad |
| CCND2/ENST00000261254   | GO:0000074 | HMMPfam_Cyclin_C<br>HMMPfam_Cyclin_N         | superfamily_Cyclin-like                            | Broad |
| CCND3/ENST00000372991   | GO:0000074 | HMMPfam_Cyclin_C<br>HMMPfam_Cyclin_N         | superfamily_Cyclin-like                            | Broad |
| CCNE1/ENST00000262643   | GO:0000074 | HMMPfam_Cyclin_C<br>HMMPfam_Cyclin_N         | superfamily_Cyclin-like                            | Broad |
| CCNE2/ENST00000308108   | GO:0000074 | HMMPfam_Cyclin_C<br>HMMPfam_Cyclin_N         | superfamily_Cyclin-like                            | WU    |
| CCNG1/ENST00000340828   | GO:0000074 | HMMPfam_Cyclin_N                             | superfamily_Cyclin-like                            | Broad |
| CCNG2/ENST00000354403   | GO:0000074 | HMMPfam_Cyclin_N                             | superfamily_Cyclin-like                            | WU    |
| CCNH/ENST00000380104    | GO:0000074 | HMMPfam_Cyclin_N                             | superfamily_Cyclin-like                            | Broad |
| CCNK/OTTHUMT00000072347 | GO:0000074 | HMMPfam_Cyclin_N                             | superfamily_Cyclin-like                            | BCM   |
| CCNT1/ENST00000261900   | GO:0000074 | HMMPfam_Cyclin_N                             | superfamily_Cyclin-like                            | Broad |
| CCNT2/ENST00000264157   | GO:0000074 | HMMPfam_Cyclin_N                             | superfamily_Cyclin-like                            | Broad |
| CCRK/ENST00000286878    | GO:0004672 | HMMPfam_Pkinase                              | superfamily_Protein kinase-like (PK-like)          | Broad |
| CDC2/ENST00000373811    | GO:0004672 | HMMPfam_Pkinase                              | superfamily_Protein kinase-like (PK-like)          | WU    |
| CDC25A/ENST00000302506  | GO:0000087 | HMMPfam_M-inducer_phosp<br>HMMPfam_Rhodanese | superfamily_Rhodanese/Cell cycle control phosphata | WU    |
| CDC25B/NM_021873        | GO:0000087 | HMMPfam_M-inducer_phosp<br>HMMPfam_Rhodanese | superfamily_Rhodanese/Cell cycle control phosphata | BCM   |
| CDC25C/ENST00000323760  | GO:0000087 | HMMPfam_M-inducer_phosp<br>HMMPfam_Rhodanese | superfamily_Rhodanese/Cell cycle control phosphata | WU    |
| CDC2L2/NM_024011        | GO:0004672 | HMMPfam_Pkinase                              | superfamily_Protein kinase-like (PK-like)          | BCM   |

|                          |                                                      |                                                                                                                       |                                                                                                             |       |
|--------------------------|------------------------------------------------------|-----------------------------------------------------------------------------------------------------------------------|-------------------------------------------------------------------------------------------------------------|-------|
| CDC2L5/ENST00000181839   | GO:0004672                                           | HMMPfam_Pkinase                                                                                                       | superfamily_Protein kinase-like (PK-like)                                                                   | BCM   |
| CDC2L6/ENST00000368911   | GO:0004672                                           | HMMPfam_Pkinase                                                                                                       | superfamily_Protein kinase-like (PK-like)                                                                   | Broad |
| CDC42BPA/ENST00000366766 | GO:0007242<br>GO:0004672<br>GO:0004674<br>GO:0005083 | HMMPfam_C1_1<br>HMMPfam_CNH<br>HMMPfam_DMPK_coil<br>HMMPfam_PH<br>HMMPfam_Pkinase<br>HMMPfam_Pkinase_C                | superfamily_Cysteine-rich domain<br>superfamily_PH domain-like<br>superfamily_Protein kinase-like (PK-like) | WU    |
| CDC42BPB/ENST00000361246 | GO:0007242<br>GO:0004672<br>GO:0004674<br>GO:0005083 | HMMPfam_C1_1<br>HMMPfam_CNH<br>HMMPfam_DMPK_coil<br>HMMPfam_PBD<br>HMMPfam_PH<br>HMMPfam_Pkinase<br>HMMPfam_Pkinase_C | superfamily_Cysteine-rich domain<br>superfamily_PH domain-like<br>superfamily_Protein kinase-like (PK-like) | BCM   |
| CDC42BPG/ENST00000302001 | GO:0007242<br>GO:0004672<br>GO:0004674<br>GO:0005083 | HMMPfam_C1_1<br>HMMPfam_CNH<br>HMMPfam_DMPK_coil<br>HMMPfam_PBD<br>HMMPfam_PH<br>HMMPfam_Pkinase<br>HMMPfam_Pkinase_C | superfamily_Cysteine-rich domain<br>superfamily_PH domain-like<br>superfamily_Protein kinase-like (PK-like) | BCM   |
| CDC7/ENST00000370415     | GO:0004672                                           | HMMPfam_Pkinase                                                                                                       | superfamily_Protein kinase-like (PK-like)                                                                   | Broad |
| CDH1/ENST00000268794     | GO:0005509                                           | HMMPfam_Cadherin<br>HMMPfam_Cadherin_C<br>HMMPfam_Cadherin_pro                                                        | superfamily_Cadherin-like                                                                                   | BCM   |
| CDH11/ENST00000268603    | GO:0005509                                           | HMMPfam_Cadherin<br>HMMPfam_Cadherin_C                                                                                | superfamily_Cadherin-like                                                                                   | BCM   |
| CDH4/ENST00000360469     | GO:0005509                                           | HMMPfam_Cadherin<br>HMMPfam_Cadherin_C<br>HMMPfam_Cadherin_pro                                                        | superfamily_Cadherin-like                                                                                   | BCM   |
| CDK10/ENST00000353379    | GO:0004672                                           | HMMPfam_Pkinase                                                                                                       | superfamily_Protein kinase-like (PK-like)                                                                   | Broad |
| CDK2/ENST00000266970     | GO:0004672                                           | HMMPfam_Pkinase                                                                                                       | superfamily_Protein kinase-like (PK-like)                                                                   | BCM   |

|                          |            |                                            |                                                                                             |       |
|--------------------------|------------|--------------------------------------------|---------------------------------------------------------------------------------------------|-------|
| CDK3/ENST00000293215     | GO:0004672 | HMMPfam_Pkinase                            | superfamily_Protein kinase-like (PK-like)                                                   | Broad |
| CDK4/ENST00000257904     | GO:0004672 | HMMPfam_Pkinase                            | superfamily_Protein kinase-like (PK-like)                                                   | Broad |
| CDK5/ENST00000297518     | GO:0004672 | HMMPfam_Pkinase                            | superfamily_Protein kinase-like (PK-like)                                                   | BCM   |
| CDK6/ENST00000265734     | GO:0004672 | HMMPfam_Pkinase                            | superfamily_Protein kinase-like (PK-like)                                                   | BCM   |
| CDK7/ENST00000380832     | GO:0004672 | HMMPfam_Pkinase                            | superfamily_Protein kinase-like (PK-like)                                                   | WU    |
| CDK8/ENST00000381527     | GO:0004672 | HMMPfam_Pkinase                            | superfamily_Protein kinase-like (PK-like)                                                   | Broad |
| CDK9/ENST00000373265     | GO:0004672 | HMMPfam_Pkinase                            | superfamily_Protein kinase-like (PK-like)                                                   | WU    |
| CDKN1A/ENST00000373712   | GO:0004861 | HMMPfam_CDI                                |                                                                                             | BCM   |
| CDKN1B/ENST00000228872   | GO:0004861 | HMMPfam_CDI                                |                                                                                             | Broad |
| CDKN1C/ENST00000313407   | GO:0004861 | HMMPfam_CDI                                |                                                                                             | BCM   |
| CDKN2A/ENST00000361570   |            | HMMPfam_P19Arf_N                           |                                                                                             | SHARE |
| CDKN2B/ENST00000276925   |            | HMMPfam_Ank                                | superfamily_Ankyrin repeat                                                                  | WU    |
| CDKN2C/ENST00000262662   |            | HMMPfam_Ank                                | superfamily_Ankyrin repeat                                                                  | WU    |
| CDKN2D/ENST00000335766   |            | HMMPfam_Ank                                | superfamily_Ankyrin repeat                                                                  | BCM   |
| CDKN3/ENST00000335183    |            | HMMPfam_CDKN3                              | superfamily_(Phosphotyrosine protein) phosphatases                                          | Broad |
| CEBPA/OTTHUMT00000150648 | GO:0003677 | HMMPfam_bZIP_2                             |                                                                                             | Broad |
| CHEK1/ENST00000278916    | GO:0004672 | HMMPfam_Pkinase                            | superfamily_Protein kinase-like (PK-like)                                                   | BCM   |
| CHEK2/ENST00000382580    | GO:0004672 | HMMPfam_FHA<br>HMMPfam_Pkinase             | superfamily_Protein kinase-like (PK-like)<br>superfamily_SMAD/FHA domain                    | Broad |
| CISH/OTTHUMT00000264778  | GO:0007242 | HMMPfam_SH2<br>HMMPfam_SOCS_box            | superfamily_SH2 domain                                                                      | WU    |
| CNKSRI/ENST00000374253   | GO:0005515 | HMMPfam_PH<br>HMMPfam_SAM_2                | superfamily_PDZ domain-like<br>superfamily_PH domain-like<br>superfamily_SAM/Pointed domain | Broad |
| CNTN4/OTTHUMT00000263484 |            | HMMPfam_I-set<br>HMMPfam_fn3<br>HMMPfam_ig | superfamily_Fibronectin type III<br>superfamily_Immunoglobulin                              | BCM   |
| CNTN6/ENST00000350110    |            | HMMPfam_I-set<br>HMMPfam_fn3<br>HMMPfam_ig | superfamily_Fibronectin type III<br>superfamily_Immunoglobulin                              | BCM   |
| CRK/ENST00000382237      | GO:0007242 | HMMPfam_SH2<br>HMMPfam_SH3_1               | superfamily_SH2 domain<br>superfamily_SH3-domain                                            | SHARE |

|                          |                          |                                                           |                                                                                                          |       |
|--------------------------|--------------------------|-----------------------------------------------------------|----------------------------------------------------------------------------------------------------------|-------|
|                          |                          | HMMPfam_SH3_2                                             |                                                                                                          |       |
| CRK7/ENST00000300647     | GO:0004672               | HMMPfam_Pkinase                                           | superfamily_Protein kinase-like (PK-like)                                                                | BCM   |
| CRKL/ENST00000354336     | GO:0007242               | HMMPfam_SH2<br>HMMPfam_SH3_1<br>HMMPfam_SH3_2             | superfamily_SH2 domain<br>superfamily_SH3-domain                                                         | SHARE |
| CROT/ENST00000331536     | GO:0008415               | HMMPfam_Carn_acyltransf                                   | superfamily_CoA-dependent acyltransferases                                                               | WU    |
| CSF1R/ENST00000286301    | GO:0004713               | HMMPfam_Pkinase_Tyr<br>HMMPfam_V-set<br>HMMPfam_ig        | superfamily_Immunoglobulin<br>superfamily_Protein kinase-like (PK-like)                                  | BCM   |
| CSK/ENST00000220003      | GO:0007242<br>GO:0004713 | HMMPfam_Pkinase_Tyr<br>HMMPfam_SH2<br>HMMPfam_SH3_1       | superfamily_Protein kinase-like (PK-like)<br>superfamily_SH2 domain<br>superfamily_SH3-domain            | Broad |
| CTNNB1/ENST00000349496   |                          | HMMPfam_Arm<br>HMMPfam_HEAT                               | superfamily_ARM repeat                                                                                   | WU    |
| CYB561D2/ENST00000232508 | GO:0006118               | HMMPfam_Cytochrom_B561                                    |                                                                                                          | WU    |
| CYLD/ENST00000311559     |                          | HMMPfam_CAP_GLY                                           | superfamily_Cap-Gly domain<br>superfamily_Cysteine proteinases                                           | WU    |
| CYSLTR2/ENST00000282018  | GO:0001584               | HMMPfam_7tm_1                                             | superfamily_Family A G protein-coupled receptor-li                                                       | Broad |
| DDR1/NM_013994           | GO:0007155<br>GO:0004713 | HMMPfam_F5_F8_type_C<br>HMMPfam_Pkinase_Tyr               | superfamily_Galactose-binding domain-like<br>superfamily_Protein kinase-like (PK-like)                   | BCM   |
| DDR2/ENST00000367922     | GO:0007155<br>GO:0004713 | HMMPfam_F5_F8_type_C<br>HMMPfam_Pkinase_Tyr               | superfamily_Galactose-binding domain-like<br>superfamily_Protein kinase-like (PK-like)                   | Broad |
| DHH/ENST00000266991      | GO:0007267<br>GO:0006508 | HMMPfam_HH_signal<br>HMMPfam_Hint                         | superfamily_Hedgehog/DD-peptidase<br>superfamily_Hedgehog/intein (Hint) domain                           | BCM   |
| DIRAS3/ENST00000370981   |                          | HMMPfam_Ras                                               | superfamily_P-loop containing nucleoside triphosph                                                       | BCM   |
| DKFZp434N035/NM_032262   |                          |                                                           |                                                                                                          | BCM   |
| DMPK/ENST00000342805     | GO:0004672<br>GO:0004674 | HMMPfam_DMPK_coil<br>HMMPfam_Pkinase<br>HMMPfam_Pkinase_C | superfamily_Protein kinase-like (PK-like)                                                                | WU    |
| DOCK3/ENST00000266037    | GO:0005085               | HMMPfam_Ded_cyto<br>HMMPfam_SH3_2                         | superfamily_ARM repeat<br>superfamily_SH3-domain                                                         | WU    |
| DUSP6/ENST00000279488    | GO:0006470               | HMMPfam_DSPc<br>HMMPfam_Rhodanese                         | superfamily_(Phosphotyrosine protein) phosphatases<br>superfamily_Rhodanese/Cell cycle control phosphata | WU    |

|                          |                                        |                                                                           |                                                                                                                                                                                                           |       |
|--------------------------|----------------------------------------|---------------------------------------------------------------------------|-----------------------------------------------------------------------------------------------------------------------------------------------------------------------------------------------------------|-------|
| DUSP24/ENST00000341238   | GO:0006470                             | HMMPfam_DSPc                                                              | superfamily_(Phosphotyrosine protein) phosphatases<br>superfamily_Rhodanese/Cell cycle control phosphata                                                                                                  | WU    |
| E2F1/ENST00000343380     | GO:0000074                             | HMMPfam_E2F_TDP                                                           |                                                                                                                                                                                                           | Broad |
| E2F2/ENST00000361729     | GO:0000074                             | HMMPfam_E2F_TDP                                                           |                                                                                                                                                                                                           | Broad |
| E2F3/ENST00000346618     | GO:0000074                             | HMMPfam_E2F_TDP                                                           |                                                                                                                                                                                                           | BCM   |
| E2F4/ENST00000388769     | GO:0000074                             | HMMPfam_E2F_TDP                                                           | superfamily_Chromo domain-like                                                                                                                                                                            | BCM   |
| E2F5/ENST00000256117     | GO:0000074                             | HMMPfam_E2F_TDP                                                           |                                                                                                                                                                                                           | Broad |
| E2F6/ENST00000307236     | GO:0000074                             | HMMPfam_E2F_TDP                                                           |                                                                                                                                                                                                           | BCM   |
| EGFR/ENST00000275493     | GO:0016020<br>GO:0004713<br>GO:0004714 | HMMPfam_Furin-like<br>HMMPfam_Pkinase_Tyr<br>HMMPfam_Recep_L domain       | superfamily_Growth factor receptor domain<br>superfamily_L domain-like<br>superfamily_Protein kinase-like (PK-like)                                                                                       | SHARE |
| EIF4E/ENST00000280892    | GO:0003723                             | HMMPfam_IF4E                                                              | superfamily_Translation initiation factor eIF4e                                                                                                                                                           | BCM   |
| EIF4EBP1/ENST00000338825 | GO:0008190                             | HMMPfam_eIF_4EBP                                                          |                                                                                                                                                                                                           | WU    |
| EIF4G1/ENST00000382330   | GO:0003723<br>GO:0003743               | HMMPfam_MA3<br>HMMPfam_MIF4G<br>HMMPfam_W2                                | superfamily_ARM repeat                                                                                                                                                                                    | BCM   |
| EPHA1/ENST00000275815    | GO:0005003<br>GO:0004713               | HMMPfam_Ephrin_lbd<br>HMMPfam_Pkinase_Tyr<br>HMMPfam_SAM_1<br>HMMPfam_fn3 | superfamily_Fibronectin type III<br>superfamily_Galactose-binding domain-like<br>superfamily_Growth factor receptor domain<br>superfamily_Protein kinase-like (PK-like)<br>superfamily_SAM/Pointed domain | WU    |
| EPHA2/ENST00000375634    | GO:0005003<br>GO:0004713               | HMMPfam_Ephrin_lbd<br>HMMPfam_Pkinase_Tyr<br>HMMPfam_SAM_1<br>HMMPfam_fn3 | superfamily_Fibronectin type III<br>superfamily_Galactose-binding domain-like<br>superfamily_Growth factor receptor domain<br>superfamily_Protein kinase-like (PK-like)<br>superfamily_SAM/Pointed domain | BCM   |
| EPHA3/ENST00000336596    | GO:0005003<br>GO:0004713               | HMMPfam_Ephrin_lbd<br>HMMPfam_Pkinase_Tyr<br>HMMPfam_SAM_2<br>HMMPfam_fn3 | superfamily_Fibronectin type III<br>superfamily_Galactose-binding domain-like<br>superfamily_Growth factor receptor domain<br>superfamily_Protein kinase-like (PK-like)<br>superfamily_SAM/Pointed domain | Broad |
| EPHA4/ENST00000281821    | GO:0005003<br>GO:0004713               | HMMPfam_Ephrin_lbd<br>HMMPfam_Pkinase_Tyr                                 | superfamily_Fibronectin type III<br>superfamily_Galactose-binding domain-like                                                                                                                             | WU    |

|                          |                          |                                                                                           |                                                                                                                                                                                                           |       |
|--------------------------|--------------------------|-------------------------------------------------------------------------------------------|-----------------------------------------------------------------------------------------------------------------------------------------------------------------------------------------------------------|-------|
|                          |                          | HMMPfam_SAM_2<br>HMMPfam_fn3                                                              | superfamily_Growth factor receptor domain<br>superfamily_Protein kinase-like (PK-like)<br>superfamily_SAM/Pointed domain                                                                                  |       |
| EPHA5/ENST00000273854    | GO:0005003<br>GO:0004713 | HMMPfam_BmKX<br>HMMPfam_Ephrin_lbd<br>HMMPfam_Pkinase_Tyr<br>HMMPfam_SAM_1<br>HMMPfam_fn3 | superfamily_Fibronectin type III<br>superfamily_Galactose-binding domain-like<br>superfamily_Growth factor receptor domain<br>superfamily_Protein kinase-like (PK-like)<br>superfamily_SAM/Pointed domain | Broad |
| EPHA6/ENST00000389672    | GO:0005003<br>GO:0004713 | HMMPfam_Ephrin_lbd<br>HMMPfam_Pkinase_Tyr<br>HMMPfam_SAM_1<br>HMMPfam_fn3                 | superfamily_Fibronectin type III<br>superfamily_Galactose-binding domain-like<br>superfamily_Growth factor receptor domain<br>superfamily_Protein kinase-like (PK-like)<br>superfamily_SAM/Pointed domain | Broad |
| EPHA7/ENST00000369303    | GO:0005003<br>GO:0004713 | HMMPfam_Ephrin_lbd<br>HMMPfam_Pkinase_Tyr<br>HMMPfam_SAM_1<br>HMMPfam_fn3                 | superfamily_Fibronectin type III<br>superfamily_Galactose-binding domain-like<br>superfamily_Growth factor receptor domain<br>superfamily_Protein kinase-like (PK-like)<br>superfamily_SAM/Pointed domain | BCM   |
| EPHA8/ENST00000166244    | GO:0005003<br>GO:0004713 | HMMPfam_Ephrin_lbd<br>HMMPfam_Pkinase_Tyr<br>HMMPfam_SAM_1<br>HMMPfam_fn3                 | superfamily_Fibronectin type III<br>superfamily_Galactose-binding domain-like<br>superfamily_Growth factor receptor domain<br>superfamily_Protein kinase-like (PK-like)<br>superfamily_SAM/Pointed domain | Broad |
| EPHB1/OTTHUMT00000266419 | GO:0005003<br>GO:0004713 | HMMPfam_Ephrin_lbd<br>HMMPfam_Pkinase_Tyr<br>HMMPfam_SAM_1<br>HMMPfam_fn3                 | superfamily_Fibronectin type III<br>superfamily_Galactose-binding domain-like<br>superfamily_Growth factor receptor domain<br>superfamily_Protein kinase-like (PK-like)<br>superfamily_SAM/Pointed domain | Broad |
| EPHB2/ENST00000374630    | GO:0005003<br>GO:0004713 | HMMPfam_Ephrin_lbd<br>HMMPfam_Pkinase_Tyr<br>HMMPfam_SAM_1<br>HMMPfam_fn3                 | superfamily_Fibronectin type III<br>superfamily_Galactose-binding domain-like<br>superfamily_Growth factor receptor domain<br>superfamily_Protein kinase-like (PK-like)<br>superfamily_SAM/Pointed domain | Broad |

|                       |                                        |                                                                                    |                                                                                                                                                                                                           |       |
|-----------------------|----------------------------------------|------------------------------------------------------------------------------------|-----------------------------------------------------------------------------------------------------------------------------------------------------------------------------------------------------------|-------|
| EPHB3/ENST00000330394 | GO:0005003<br>GO:0004713               | HMMPfam_Ephrin_lbd<br>HMMPfam_Pkinase_Tyr<br>HMMPfam_SAM_1<br>HMMPfam_fn3          | superfamily_Fibronectin type III<br>superfamily_Galactose-binding domain-like<br>superfamily_Growth factor receptor domain<br>superfamily_Protein kinase-like (PK-like)<br>superfamily_SAM/Pointed domain | BCM   |
| EPHB4/ENST00000358173 | GO:0005003<br>GO:0004713               | HMMPfam_Ephrin_lbd<br>HMMPfam_Pkinase_Tyr<br>HMMPfam_SAM_1<br>HMMPfam_fn3          | superfamily_Fibronectin type III<br>superfamily_Galactose-binding domain-like<br>superfamily_Growth factor receptor domain<br>superfamily_Protein kinase-like (PK-like)<br>superfamily_SAM/Pointed domain | BCM   |
| EPHB6/ENST00000222847 | GO:0005003<br>GO:0004713               | HMMPfam_Ephrin_lbd<br>HMMPfam_Pkinase_Tyr<br>HMMPfam_SAM_2<br>HMMPfam_fn3          | superfamily_Fibronectin type III<br>superfamily_Galactose-binding domain-like<br>superfamily_Protein kinase-like (PK-like)<br>superfamily_SAM/Pointed domain<br>superfamily_TNF receptor-like             | WU    |
| EPHX1/ENST00000272167 | GO:0004301                             | HMMPfam_Abhydrolase_1<br>HMMPfam_EHN                                               | superfamily_alpha/beta-Hydrolases                                                                                                                                                                         | WU    |
| EPM2A/ENST00000367519 | GO:0030246<br>GO:0006470               | HMMPfam_DSPc                                                                       | superfamily_(Phosphotyrosine protein) phosphatases<br>superfamily_Starch-binding domain-like                                                                                                              | BCM   |
| ERAS/ENST00000338270  |                                        | HMMPfam_Ras                                                                        | superfamily_P-loop containing nucleoside triphosph                                                                                                                                                        | SHARE |
| ERBB2/ENST00000269571 | GO:0016020<br>GO:0004713<br>GO:0004714 | HMMPfam_Furin-like<br>HMMPfam_Pkinase_Tyr<br>HMMPfam_Recep_L_domain<br>HMMPfam_YLP | superfamily_Growth factor receptor domain<br>superfamily_L domain-like<br>superfamily_Protein kinase-like (PK-like)                                                                                       | SHARE |
| ERBB3/ENST00000267101 | GO:0016020<br>GO:0004713<br>GO:0004714 | HMMPfam_Furin-like<br>HMMPfam_Pkinase_Tyr<br>HMMPfam_Recep_L_domain                | superfamily_Growth factor receptor domain<br>superfamily_L domain-like<br>superfamily_Protein kinase-like (PK-like)                                                                                       | SHARE |
| ERBB4/ENST00000342788 | GO:0016020<br>GO:0004713<br>GO:0004714 | HMMPfam_Furin-like<br>HMMPfam_Pkinase_Tyr<br>HMMPfam_Recep_L_domain<br>HMMPfam_YLP | superfamily_Growth factor receptor domain<br>superfamily_L domain-like<br>superfamily_Protein kinase-like (PK-like)                                                                                       | SHARE |
| ERCC2/ENST00000221481 | GO:0004003<br>GO:0003677               | HMMPfam_DEAD_2<br>HMMPfam_DUF1227                                                  | superfamily_P-loop containing nucleoside triphosph                                                                                                                                                        | WU    |



|                       |                          |                                                    |                                                                         |       |
|-----------------------|--------------------------|----------------------------------------------------|-------------------------------------------------------------------------|-------|
| ERG/ENST00000288319   | GO:0005634<br>GO:0003700 | HMMPfam_Ets<br>HMMPfam_SAM_PNT                     | superfamily_SAM/Pointed domain                                          | WU    |
| ETS1/ENST00000319397  | GO:0005634<br>GO:0003700 | HMMPfam_Ets<br>HMMPfam_SAM_PNT                     | superfamily_SAM/Pointed domain                                          | BCM   |
| ETS2/ENST00000360938  | GO:0005634<br>GO:0003700 | HMMPfam_Ets<br>HMMPfam_SAM_PNT                     | superfamily_SAM/Pointed domain                                          | WU    |
| ETV6/ENST00000266427  | GO:0005634<br>GO:0003700 | HMMPfam_Ets<br>HMMPfam_SAM_PNT                     | superfamily_SAM/Pointed domain                                          | Broad |
| ETV7/ENST00000340181  | GO:0005634<br>GO:0003700 | HMMPfam_Ets<br>HMMPfam_SAM_PNT                     | superfamily_SAM/Pointed domain                                          | BCM   |
| EVH1/ENST00000264674  | GO:0003676               | HMMPfam_zf-C2H2                                    | superfamily_C2H2 and C2HC zinc fingers                                  | WU    |
| FAS/ENST00000371875   | GO:0005515<br>GO:0004872 | HMMPfam_Death<br>HMMPfam_TNFR_c6                   | superfamily_DEATH domain<br>superfamily_TNF receptor-like               | Broad |
| FBXW7/ENST00000281708 |                          | HMMPfam_F-box<br>HMMPfam_WD40                      | superfamily_F-box domain<br>superfamily_WD40 repeat-like                | BCM   |
| FER/ENST00000379734   | GO:0007242<br>GO:0004713 | HMMPfam_FCH<br>HMMPfam_Pkinase_Tyr<br>HMMPfam_SH2  | superfamily_Protein kinase-like (PK-like)<br>superfamily_SH2 domain     | Broad |
| FES/ENST00000328850   | GO:0007242<br>GO:0004713 | HMMPfam_FCH<br>HMMPfam_Pkinase_Tyr<br>HMMPfam_SH2  | superfamily_Protein kinase-like (PK-like)<br>superfamily_SH2 domain     | WU    |
| FEV/ENST00000295727   | GO:0003700               | HMMPfam_Ets                                        |                                                                         | WU    |
| FGF3/ENST00000334134  | GO:0008083               | HMMPfam_FGF                                        | superfamily_Cytokine                                                    | BCM   |
| FGF4/ENST00000168712  | GO:0008083               | HMMPfam_FGF                                        | superfamily_Cytokine                                                    | BCM   |
| FGF5/ENST00000312465  | GO:0008083               | HMMPfam_FGF                                        | superfamily_Cytokine                                                    | WU    |
| FGFR1/ENST00000310729 | GO:0004713               | HMMPfam_I-set<br>HMMPfam_Pkinase_Tyr<br>HMMPfam_ig | superfamily_Immunoglobulin<br>superfamily_Protein kinase-like (PK-like) | SHARE |
| FGFR2/ENST00000351936 | GO:0004713               | HMMPfam_Pkinase_Tyr<br>HMMPfam_ig                  | superfamily_Immunoglobulin<br>superfamily_Protein kinase-like (PK-like) | SHARE |
| FGFR3/ENST00000360915 | GO:0004713               | HMMPfam_I-set<br>HMMPfam_Pkinase_Tyr<br>HMMPfam_ig | superfamily_Immunoglobulin<br>superfamily_Protein kinase-like (PK-like) | SHARE |

|                          |                                        |                                                            |                                                                                                                       |       |
|--------------------------|----------------------------------------|------------------------------------------------------------|-----------------------------------------------------------------------------------------------------------------------|-------|
| FGFR4/OTTHUMT00000253412 | GO:0005634<br>GO:0005515<br>GO:0008270 | HMMPfam_PHD<br>HMMPfam_PWWP<br>HMMPfam_SET                 | superfamily_FYVE/PHD zinc finger<br>superfamily_SET domain<br>superfamily_Tudor/PWWP/MBT                              | SHARE |
| FGR/ENST00000374005      | GO:0007242<br>GO:0004713               | HMMPfam_Pkinase_Tyr<br>HMMPfam_SH2<br>HMMPfam_SH3_1        | superfamily_Protein kinase-like (PK-like)<br>superfamily_SH2 domain<br>superfamily_SH3-domain                         | SHARE |
| FH/ENST00000366560       | GO:0003824                             | HMMPfam_Lyase_1                                            | superfamily_L-aspartase-like                                                                                          | WU    |
| FHIT/ENST00000341848     |                                        | HMMPfam_HIT                                                | superfamily_HIT-like                                                                                                  | BCM   |
| FKBP1A/ENST00000381742   | GO:0006457                             | HMMPfam_FKBP_C                                             | superfamily_FKBP-like                                                                                                 | BCM   |
| FLJ25006/ENST00000301037 | GO:0004672                             | HMMPfam_Pkinase                                            | superfamily_Protein kinase-like (PK-like)                                                                             | WU    |
| FLJ30473/ENST00000335375 | GO:0006118<br>GO:0016491               | HMMPfam_Pyr_redux<br>HMMPfam_Pyr_redux_2<br>HMMPfam_Rieske | superfamily_FAD/NAD(P)-binding domain<br>superfamily_FAD/NAD-linked reductases dimerisation<br>superfamily_ISP domain | BCM   |
| FLT1/ENST00000282397     | GO:0004713                             | HMMPfam_I-set<br>HMMPfam_Pkinase_Tyr<br>HMMPfam_ig         | superfamily_Immunoglobulin<br>superfamily_Protein kinase-like (PK-like)                                               | SHARE |
| FLT3/ENST00000380982     | GO:0004713                             | HMMPfam_Pkinase_Tyr<br>HMMPfam_ig                          | superfamily_Immunoglobulin<br>superfamily_Protein kinase-like (PK-like)                                               | BCM   |
| FLT4/ENST00000261937     | GO:0004713                             | HMMPfam_I-set<br>HMMPfam_Pkinase_Tyr<br>HMMPfam_ig         | superfamily_Immunoglobulin<br>superfamily_Protein kinase-like (PK-like)                                               | SHARE |
| FNDC3A/ENST00000337156   |                                        | HMMPfam_fn3                                                | superfamily_Fibronectin type III                                                                                      | Broad |
| FOS/OTTHUMT00000072944   | GO:0003677                             | HMMPfam_bZIP_2                                             | superfamily_A DNA-binding domain in eukaryotic tra                                                                    | WU    |
| FOSB/ENST00000353609     | GO:0003677                             | HMMPfam_bZIP_2                                             | superfamily_A DNA-binding domain in eukaryotic tra                                                                    | WU    |
| FOSL2/ENST00000379616    | GO:0003677                             | HMMPfam_bZIP_2                                             | superfamily_A DNA-binding domain in eukaryotic tra                                                                    | Broad |
| FOXO1A/ENST00000379561   | GO:0003700                             | HMMPfam_Fork_head                                          |                                                                                                                       | BCM   |
| FOXO3A/ENST00000343882   | GO:0003700                             | HMMPfam_Fork_head                                          |                                                                                                                       | Broad |
| FOXP1/ENST00000318789    | GO:0003700                             | HMMPfam_Fork_head                                          | superfamily_C2H2 and C2HC zinc fingers                                                                                | BCM   |
| FRK/ENST00000368626      | GO:0007242<br>GO:0004713               | HMMPfam_Pkinase_Tyr<br>HMMPfam_SH2<br>HMMPfam_SH3_1        | superfamily_Protein kinase-like (PK-like)<br>superfamily_SH2 domain<br>superfamily_SH3-domain                         | Broad |
| FYN/ENST00000368678      | GO:0007242<br>GO:0004713               | HMMPfam_Pkinase_Tyr<br>HMMPfam_SH2                         | superfamily_Protein kinase-like (PK-like)<br>superfamily_SH2 domain                                                   | SHARE |

|                       |                          |                                                        |                                                                                                                                                                                           |       |
|-----------------------|--------------------------|--------------------------------------------------------|-------------------------------------------------------------------------------------------------------------------------------------------------------------------------------------------|-------|
|                       |                          | HMMPfam_SH3_1                                          | superfamily_SH3-domain                                                                                                                                                                    |       |
| GAK/ENST00000314167   | GO:0031072<br>GO:0004672 | HMMPfam_DnaJ<br>HMMPfam_Pkinase                        | superfamily_(Phosphotyrosine protein) phosphatases<br>superfamily_C2 domain (Calcium/lipid-binding domain)<br>superfamily_Chaperone J-domain<br>superfamily_Protein kinase-like (PK-like) | Broad |
| GATA1/ENST00000376670 | GO:0003700               | HMMPfam_GATA                                           | superfamily_Glucocorticoid receptor-like (DNA-bind                                                                                                                                        | Broad |
| GBL/NM_022372         |                          | HMMPfam_WD40                                           | superfamily_WD40 repeat-like                                                                                                                                                              | WU    |
| GCK/ENST00000345378   | GO:0004396               | HMMPfam_Hexokinase_1<br>HMMPfam_Hexokinase_2           | superfamily_Actin-like ATPase domain                                                                                                                                                      | BCM   |
| GGT2/ENST00000249062  | GO:0003840               | HMMPfam_G_glu_transpept                                |                                                                                                                                                                                           | BCM   |
| GNAI2/ENST00000313601 | GO:0004871               | HMMPfam_G-alpha                                        | superfamily_P-loop containing nucleoside triphosph<br>superfamily_Transducin (alpha subunit) insertion d                                                                                  | WU    |
| GNAS/ENST00000306120  | GO:0004871               | HMMPfam_G-alpha                                        | superfamily_P-loop containing nucleoside triphosph<br>superfamily_Transducin (alpha subunit) insertion d                                                                                  | BCM   |
| GNAT1/ENST00000232461 | GO:0004871               | HMMPfam_G-alpha                                        | superfamily_P-loop containing nucleoside triphosph<br>superfamily_Transducin (alpha subunit) insertion d                                                                                  | WU    |
| GPC3/ENST00000370818  | GO:0005578               | HMMPfam_Glypican                                       |                                                                                                                                                                                           | WU    |
| GRB10/NM_005311       | GO:0007242<br>GO:0007165 | HMMPfam_BPS<br>HMMPfam_PH<br>HMMPfam_RA<br>HMMPfam_SH2 | superfamily_PH domain-like<br>superfamily_SH2 domain                                                                                                                                      | SHARE |
| GRB14/ENST00000263915 | GO:0007242<br>GO:0007165 | HMMPfam_BPS<br>HMMPfam_PH<br>HMMPfam_RA<br>HMMPfam_SH2 | superfamily_PH domain-like<br>superfamily_SH2 domain                                                                                                                                      | SHARE |
| GRB2/ENST00000316804  | GO:0007242               | HMMPfam_SH2<br>HMMPfam_SH3_1                           | superfamily_SH2 domain<br>superfamily_SH3-domain                                                                                                                                          | SHARE |
| GRB7/ENST00000309156  | GO:0007242<br>GO:0007165 | HMMPfam_BPS<br>HMMPfam_PH<br>HMMPfam_RA<br>HMMPfam_SH2 | superfamily_PH domain-like<br>superfamily_SH2 domain                                                                                                                                      | SHARE |
| GRK1/ENST00000335678  | GO:0004672<br>GO:0004871 | HMMPfam_Pkinase<br>HMMPfam_RGS                         | superfamily_Protein kinase-like (PK-like)<br>superfamily_Regulator of G-protein signaling RGS                                                                                             | Broad |

|                          |            |                        |                                                    |       |
|--------------------------|------------|------------------------|----------------------------------------------------|-------|
| GRK4/ENST00000264763     | GO:0004672 | HMMPfam_Pkinase        | superfamily_Protein kinase-like (PK-like)          | Broad |
|                          | GO:0004871 | HMMPfam_RGS            | superfamily_Regulator of G-protein signaling RGS   |       |
| GRK5/ENST00000369108     | GO:0004672 | HMMPfam_Pkinase        | superfamily_Protein kinase-like (PK-like)          | WU    |
|                          | GO:0004871 | HMMPfam_RGS            | superfamily_Regulator of G-protein signaling RGS   |       |
| GRK6/ENST00000355472     | GO:0004672 | HMMPfam_Pkinase        | superfamily_Protein kinase-like (PK-like)          | Broad |
|                          | GO:0004871 | HMMPfam_RGS            | superfamily_Regulator of G-protein signaling RGS   |       |
| GRK7/ENST00000264952     | GO:0004672 | HMMPfam_Pkinase        | superfamily_Protein kinase-like (PK-like)          | Broad |
|                          | GO:0004871 | HMMPfam_RGS            | superfamily_Regulator of G-protein signaling RGS   |       |
| GSK3A/ENST00000222330    | GO:0004672 | HMMPfam_Pkinase        | superfamily_Protein kinase-like (PK-like)          | WU    |
| GSK3B/ENST00000316626    | GO:0004672 | HMMPfam_Pkinase        | superfamily_Protein kinase-like (PK-like)          | BCM   |
| HCK/ENST00000262651      | GO:0007242 | HMMPfam_Pkinase_Tyr    | superfamily_Protein kinase-like (PK-like)          | SHARE |
|                          | GO:0004713 | HMMPfam_SH2            | superfamily_SH2 domain                             |       |
|                          |            | HMMPfam_SH3_1          | superfamily_SH3-domain                             |       |
| HD/ENST00000355072       |            | HMMPfam_HEAT           | superfamily_ARM repeat                             | Broad |
| HEMK1/ENST00000232854    | GO:0008168 | HMMPfam_MTS            | superfamily_S-adenosyl-L-methionine-dependent meth | WU    |
| HHIP/ENST00000296575     |            | HMMPfam_EGF_2          | superfamily_EGF/Laminin                            | WU    |
|                          |            |                        | superfamily_Soluble quinoprotein glucose dehydroge |       |
| HIC2/ENST00000302897     | GO:0003676 | HMMPfam_BTBTB          | superfamily_C2H2 and C2HC zinc fingers             | BCM   |
|                          |            | HMMPfam_zf-C2H2        | superfamily_POZ domain                             |       |
| HIF1A/OTTHUMT00000276979 |            | HMMPfam_HIF-1a_CTAD    | superfamily_HLH helix-loop-helix DNA-binding domai | Broad |
|                          |            | HMMPfam_PAS_3          | superfamily_PYP-like sensor domain (PAS domain)    |       |
| HRAS/ENST00000388730     |            | HMMPfam_Ras            | superfamily_P-loop containing nucleoside triphosph | SHARE |
| HRPT2/ENST00000367436    |            | HMMPfam_CDC73          | superfamily_Cell growth inhibitor/plasmid maintena | BCM   |
| HYAL1/ENST00000266031    | GO:0004415 | HMMPfam_Glyco_hydro_56 | superfamily_(Trans)glycosidases                    | WU    |
| HYAL2/ENST00000357750    | GO:0004415 | HMMPfam_Glyco_hydro_56 | superfamily_(Trans)glycosidases                    | WU    |
|                          |            |                        | superfamily_EGF/Laminin                            |       |
| HYAL3/OTTHUMT00000264836 |            | HMMPfam_IFRD           | superfamily_ARM repeat                             | WU    |
|                          |            | HMMPfam_IFRD_C         |                                                    |       |
| IFRD2/ENST00000336089    |            | HMMPfam_IFRD           | superfamily_ARM repeat                             | WU    |
|                          |            | HMMPfam_IFRD_C         |                                                    |       |
| IGF1R/ENST00000268035    | GO:0016020 | HMMPfam_Furin-like     | superfamily_Fibronectin type III                   | WU    |
|                          | GO:0004713 | HMMPfam_Pkinase_Tyr    | superfamily_Growth factor receptor domain          |       |
|                          | GO:0004714 | HMMPfam_Recep_L_domain | superfamily_L domain-like                          |       |

|                       |            |                         |                                           |       |
|-----------------------|------------|-------------------------|-------------------------------------------|-------|
|                       |            | HMMPfam_fn3             | superfamily_Protein kinase-like (PK-like) |       |
| IHH/ENST00000295731   | GO:0007267 | HMMPfam_HH_signal       | superfamily_Hedgehog/DD-peptidase         | WU    |
|                       | GO:0006508 | HMMPfam_Hint            | superfamily_Hedgehog/intein (Hint) domain |       |
| IKBKB/ENST00000342222 | GO:0004672 | HMMPfam_Pkinase         | superfamily_Protein kinase-like (PK-like) | WU    |
|                       | GO:0006464 | HMMPfam_ubiquitin       | superfamily_Ubiquitin-like                |       |
| IKBKE/ENST00000367120 | GO:0004672 | HMMPfam_Pkinase         | superfamily_Protein kinase-like (PK-like) | Broad |
| ILK/ENST00000299421   | GO:0004713 | HMMPfam_Ank             | superfamily_Ankyrin repeat                | BCM   |
|                       |            | HMMPfam_Pkinase_Tyr     | superfamily_Protein kinase-like (PK-like) |       |
| INHBA/ENST00000242208 | GO:0008083 | HMMPfam_TGF_beta        | superfamily_Cystine-knot cytokines        | BCM   |
|                       |            | HMMPfam_TGFb_propeptide |                                           |       |
| INSR/ENST00000302850  | GO:0016020 | HMMPfam_Furin-like      | superfamily_Fibronectin type III          | SHARE |
|                       | GO:0004713 | HMMPfam_Pkinase_Tyr     | superfamily_Growth factor receptor domain |       |
|                       | GO:0004714 | HMMPfam_Recep_L_domain  | superfamily_L domain-like                 |       |
|                       |            | HMMPfam_fn3             | superfamily_Protein kinase-like (PK-like) |       |
| INSRR/ENST00000368195 | GO:0016020 | HMMPfam_Furin-like      | superfamily_Fibronectin type III          | SHARE |
|                       | GO:0004713 | HMMPfam_Pkinase_Tyr     | superfamily_Growth factor receptor domain |       |
|                       | GO:0004714 | HMMPfam_Recep_L_domain  | superfamily_L domain-like                 |       |
|                       |            | HMMPfam_fn3             | superfamily_Protein kinase-like (PK-like) |       |
| IRAK1/ENST00000369980 | GO:0005515 | HMMPfam_Death           | superfamily_DEATH domain                  | BCM   |
|                       | GO:0004672 | HMMPfam_Pkinase         | superfamily_Protein kinase-like (PK-like) |       |
| IRAK2/ENST00000256458 | GO:0005515 | HMMPfam_Death           | superfamily_DEATH domain                  | BCM   |
|                       | GO:0004672 | HMMPfam_Pkinase         | superfamily_Protein kinase-like (PK-like) |       |
| IRAK3/ENST00000261233 | GO:0005515 | HMMPfam_Death           | superfamily_DEATH domain                  | Broad |
|                       | GO:0004672 | HMMPfam_Pkinase         | superfamily_Protein kinase-like (PK-like) |       |
| IRAK4/ENST00000356669 | GO:0004672 | HMMPfam_Pkinase         | superfamily_DEATH domain                  | BCM   |
|                       |            |                         | superfamily_Protein kinase-like (PK-like) |       |
| IRS1/ENST00000305123  | GO:0005158 | HMMPfam_IRS             | superfamily_PH domain-like                | WU    |
|                       |            | HMMPfam_PH              |                                           |       |
| IRS2/ENST00000375856  | GO:0005158 | HMMPfam_IRS             | superfamily_PH domain-like                | Broad |
|                       |            | HMMPfam_PH              |                                           |       |
| ITK/ENST00000231189   | GO:0007242 | HMMPfam_BTK             | superfamily_PH domain-like                | BCM   |
|                       | GO:0004713 | HMMPfam_PH              | superfamily_Protein kinase-like (PK-like) |       |
|                       |            | HMMPfam_Pkinase_Tyr     | superfamily_SH2 domain                    |       |

|                         |                          |                                                              |                                                                                                             |       |
|-------------------------|--------------------------|--------------------------------------------------------------|-------------------------------------------------------------------------------------------------------------|-------|
|                         |                          | HMMPfam_SH2<br>HMMPfam_SH3_1                                 | superfamily_SH3-domain                                                                                      |       |
| JAG1/ENST00000254958    | GO:0007219<br>GO:0007154 | HMMPfam_DSL<br>HMMPfam_EGF<br>HMMPfam_MNNL                   | superfamily_EGF/Laminin<br>superfamily_PMP inhibitors                                                       | BCM   |
| JAG2/OTTHUMT00000074540 | GO:0007219<br>GO:0007154 | HMMPfam_DSL<br>HMMPfam_EGF<br>HMMPfam_EGF_CA<br>HMMPfam_MNNL | superfamily_Concanavalin A-like lectins/glucanases<br>superfamily_EGF/Laminin<br>superfamily_PMP inhibitors | BCM   |
| JAK1/ENST00000294423    | GO:0004713               | HMMPfam_Pkinase_Tyr                                          | superfamily_Protein kinase-like (PK-like)<br>superfamily_SH2 domain                                         | SHARE |
| JAK2/ENST00000381652    | GO:0007242<br>GO:0004713 | HMMPfam_Pkinase_Tyr<br>HMMPfam_SH2                           | superfamily_Protein kinase-like (PK-like)<br>superfamily_SH2 domain                                         | SHARE |
| JAK3/ENST00000222246    | GO:0004713               | HMMPfam_Pkinase_Tyr                                          | superfamily_Protein kinase-like (PK-like)<br>superfamily_SH2 domain                                         | SHARE |
| JUN/ENST00000371222     | GO:0003700               | HMMPfam_Jun<br>HMMPfam_bZIP_1                                | superfamily_A DNA-binding domain in eukaryotic tra                                                          | WU    |
| JUNB/ENST00000302754    | GO:0003700               | HMMPfam_Jun<br>HMMPfam_bZIP_1                                | superfamily_A DNA-binding domain in eukaryotic tra                                                          | BCM   |
| JUND/ENST00000252818    | GO:0003700               | HMMPfam_Jun<br>HMMPfam_bZIP_1                                | superfamily_A DNA-binding domain in eukaryotic tra                                                          | BCM   |
| JUP/ENST00000310706     |                          | HMMPfam_Arm<br>HMMPfam_HEAT                                  | superfamily_ARM repeat                                                                                      | BCM   |
| KDR/ENST00000381338     | GO:0004713               | HMMPfam_I-set<br>HMMPfam_Pkinase_Tyr<br>HMMPfam_V-set        | superfamily_Immunoglobulin<br>superfamily_Protein kinase-like (PK-like)                                     | SHARE |
| KELCHL/ENST00000328879  |                          | HMMPfam_BACK<br>HMMPfam_BTB<br>HMMPfam_Kelch_1               | superfamily_Galactose oxidase central domain<br>superfamily_POZ domain                                      | BCM   |
| KIAA1804/NM_032435      | GO:0004672               | HMMPfam_Pkinase<br>HMMPfam_SH3_1                             | superfamily_Protein kinase-like (PK-like)<br>superfamily_SH3-domain                                         | WU    |
| KIT/ENST00000381345     | GO:0004713               | HMMPfam_Pkinase_Tyr<br>HMMPfam_ig                            | superfamily_Immunoglobulin<br>superfamily_Protein kinase-like (PK-like)                                     | SHARE |

|                           |                                        |                                                                        |                                                                                                                                                                                      |       |
|---------------------------|----------------------------------------|------------------------------------------------------------------------|--------------------------------------------------------------------------------------------------------------------------------------------------------------------------------------|-------|
| KLF6/ENST00000380960      | GO:0003676                             | HMMPfam_zf-C2H2                                                        | superfamily_C2H2 and C2HC zinc fingers                                                                                                                                               | WU    |
| KRAS/ENST00000256078      |                                        | HMMPfam_Ras                                                            | superfamily_P-loop containing nucleoside triphosph                                                                                                                                   | SHARE |
| KSR1/ENST00000319524      | GO:0007242<br>GO:0004713               | HMMPfam_C1_1<br>HMMPfam_Pkinase_Tyr                                    | superfamily_Cysteine-rich domain<br>superfamily_Protein kinase-like (PK-like)                                                                                                        | WU    |
| KSR2/ENST00000379510      | GO:0005737<br>GO:0005515               | HMMPfam_DUF1170<br>HMMPfam_PDZ<br>HMMPfam_PH<br>HMMPfam_SAM_1          | superfamily_PDZ domain-like<br>superfamily_PH domain-like<br>superfamily_SAM/Pointed domain                                                                                          | Broad |
| LATS1/ENST00000253339     | GO:0004672<br>GO:0004674               | HMMPfam_Pkinase<br>HMMPfam_Pkinase_C<br>HMMPfam_UBA                    | superfamily_N-terminal domain of adenylyl cyclase a<br>superfamily_Protein kinase-like (PK-like)<br>superfamily_UBA-like                                                             | BCM   |
| LATS2/ENST00000382592     | GO:0004672<br>GO:0004674               | HMMPfam_Pkinase<br>HMMPfam_Pkinase_C<br>HMMPfam_UBA                    | superfamily_Protein kinase-like (PK-like)<br>superfamily_UBA-like                                                                                                                    | WU    |
| LCK/ENST00000333070       | GO:0007242<br>GO:0004713               | HMMPfam_Pkinase_Tyr<br>HMMPfam_SH2<br>HMMPfam_SH3_1                    | superfamily_Protein kinase-like (PK-like)<br>superfamily_SH2 domain<br>superfamily_SH3-domain                                                                                        | SHARE |
| LIMD1/ENST00000273317     | GO:0008270                             | HMMPfam_LIM                                                            | superfamily_Glucocorticoid receptor-like (DNA-bind                                                                                                                                   | WU    |
| LIMK1/ENST00000336180     | GO:0005515<br>GO:0004672<br>GO:0008270 | HMMPfam_LIM<br>HMMPfam_PDZ<br>HMMPfam_Pkinase                          | superfamily_Glucocorticoid receptor-like (DNA-bind<br>superfamily_PDZ domain-like<br>superfamily_Protein kinase-like (PK-like)                                                       | WU    |
| LIMK2/ENST00000340552     | GO:0005515<br>GO:0004672<br>GO:0008270 | HMMPfam_LIM<br>HMMPfam_PDZ<br>HMMPfam_PP1_inhibitor<br>HMMPfam_Pkinase | superfamily_Glucocorticoid receptor-like (DNA-bind<br>superfamily_Myosin phosphatase inhibitor 17kDa pro<br>superfamily_PDZ domain-like<br>superfamily_Protein kinase-like (PK-like) | Broad |
| LMTK2/ENST00000297293     | GO:0004713                             | HMMPfam_Pkinase_Tyr                                                    | superfamily_Protein kinase-like (PK-like)                                                                                                                                            | BCM   |
| LMTK3/ENST00000270238     | GO:0004713                             | HMMPfam_Pkinase_Tyr                                                    | superfamily_Protein kinase-like (PK-like)                                                                                                                                            | WU    |
| LOC150786/ENST00000320501 |                                        | HMMPfam_Ras                                                            | superfamily_P-loop containing nucleoside triphosph                                                                                                                                   | BCM   |
| LOC375133/NM_199283       | GO:0016773                             | HMMPfam_PI3_PI4_kinase                                                 | superfamily_Protein kinase-like (PK-like)                                                                                                                                            | BCM   |
| LOC400891/ENST00000342608 |                                        |                                                                        | superfamily_RNI-like                                                                                                                                                                 | BCM   |
| LRP1B/ENST00000305375     | GO:0016020                             | HMMPfam_EGF<br>HMMPfam_EGF_2<br>HMMPfam_EGF_CA                         | superfamily_EGF/Laminin<br>superfamily_LDL receptor-like module<br>superfamily_YWTD domain                                                                                           | Broad |

|                       |                                        |                                                                   |                                                                                                                                                                                                                      |       |
|-----------------------|----------------------------------------|-------------------------------------------------------------------|----------------------------------------------------------------------------------------------------------------------------------------------------------------------------------------------------------------------|-------|
|                       |                                        | HMMPfam_Ldl_recept_a<br>HMMPfam_Ldl_recept_b<br>HMMPfam_NHL       |                                                                                                                                                                                                                      |       |
| LRRK1/ENST00000388948 | GO:0005525<br>GO:0005515<br>GO:0004672 | HMMPfam_Ank<br>HMMPfam_LRR_1<br>HMMPfam_Miro<br>HMMPfam_Pkinase   | superfamily_Ankyrin repeat<br>superfamily_L domain-like<br>superfamily_P-loop containing nucleoside triphosph<br>superfamily_Protein kinase-like (PK-like)<br>superfamily_YVTN repeat-like/Quinoprotein amine de     | WU    |
| LRRK2/ENST00000388935 | GO:0005525<br>GO:0005515<br>GO:0004672 | HMMPfam_LRR_1<br>HMMPfam_LRR_2<br>HMMPfam_Miro<br>HMMPfam_Pkinase | superfamily_ARM repeat<br>superfamily_Ankyrin repeat<br>superfamily_L domain-like<br>superfamily_P-loop containing nucleoside triphosph<br>superfamily_Protein kinase-like (PK-like)<br>superfamily_WD40 repeat-like | BCM   |
| LTF/ENST00000231751   | GO:0005576                             | HMMPfam_Transferrin                                               | superfamily_Periplasmic binding protein-like II                                                                                                                                                                      | WU    |
| LTK/ENST00000263800   | GO:0004713                             | HMMPfam_Pkinase_Tyr                                               | superfamily_EGF/Laminin<br>superfamily_Protein kinase-like (PK-like)                                                                                                                                                 | WU    |
| LYK5/ENST00000336174  | GO:0004672                             | HMMPfam_Pkinase                                                   | superfamily_Protein kinase-like (PK-like)                                                                                                                                                                            | Broad |
| LYN/ENST00000359619   | GO:0007242<br>GO:0004713               | HMMPfam_Pkinase_Tyr<br>HMMPfam_SH2<br>HMMPfam_SH3_1               | superfamily_Protein kinase-like (PK-like)<br>superfamily_SH2 domain<br>superfamily_SH3-domain                                                                                                                        | SHARE |
| LZTR1/ENST00000215739 |                                        | HMMPfam_BT<br>HMMPfam_Kelch_1<br>HMMPfam_Kelch_2                  | superfamily_Galactose oxidase central domain<br>superfamily_POZ domain                                                                                                                                               | BCM   |
| MAF/ENST00000326043   | GO:0003677                             | HMMPfam_Maf_N<br>HMMPfam_bZIP_Maf                                 | superfamily_A DNA-binding domain in eukaryotic tra                                                                                                                                                                   | BCM   |
| MAFA/ENST00000333480  | GO:0003677                             | HMMPfam_Maf_N<br>HMMPfam_bZIP_Maf                                 | superfamily_A DNA-binding domain in eukaryotic tra                                                                                                                                                                   | Broad |
| MAFB/ENST00000373313  | GO:0003677                             | HMMPfam_Maf_N<br>HMMPfam_bZIP_Maf                                 | superfamily_A DNA-binding domain in eukaryotic tra                                                                                                                                                                   | WU    |
| MAFF/ENST00000338483  | GO:0003677                             | HMMPfam_bZIP_Maf                                                  | superfamily_A DNA-binding domain in eukaryotic tra                                                                                                                                                                   | Broad |
| MAFG/ENST00000357736  | GO:0003677                             | HMMPfam_bZIP_Maf                                                  | superfamily_A DNA-binding domain in eukaryotic tra                                                                                                                                                                   | Broad |
| MAFK/ENST00000343242  | GO:0003677                             | HMMPfam_bZIP_Maf                                                  | superfamily_A DNA-binding domain in eukaryotic tra                                                                                                                                                                   | Broad |



|                            |                                                                                                                                          |                                  |                                                                                               |       |
|----------------------------|------------------------------------------------------------------------------------------------------------------------------------------|----------------------------------|-----------------------------------------------------------------------------------------------|-------|
| MAML1/NM_014757            |                                                                                                                                          | HMMPfam_MAPEG                    |                                                                                               | Broad |
| MAML2/NM_032427            | GO:0007219<br>GO:0005634<br>GO:0045944<br>GO:0006355<br>GO:0006350<br>GO:0003713                                                         |                                  |                                                                                               | WU    |
| MAML3/ENST00000327122      | GO:0003677<br>GO:0007219<br>GO:0004879<br>GO:0007399<br>GO:0005634<br>GO:0045944<br>GO:0006355<br>GO:0006350<br>GO:0003713<br>GO:0003700 |                                  |                                                                                               | WU    |
| MAP2K1/ENST00000307102     | GO:0004672                                                                                                                               | HMMPfam_Pkinase                  | superfamily_Protein kinase-like (PK-like)                                                     | Broad |
| MAP2K2/ENST00000262948     | GO:0004672                                                                                                                               | HMMPfam_Pkinase                  | superfamily_Protein kinase-like (PK-like)                                                     | BCM   |
| MAP2K4/ENST00000353533     | GO:0004672                                                                                                                               | HMMPfam_Pkinase                  | superfamily_Protein kinase-like (PK-like)                                                     | Broad |
| MAP2K5/ENST00000354498     | GO:0004672                                                                                                                               | HMMPfam_PB1<br>HMMPfam_Pkinase   | superfamily_CAD PB1 domains<br>superfamily_Protein kinase-like (PK-like)                      | Broad |
| MAP2K6/ENST00000359094     | GO:0004672                                                                                                                               | HMMPfam_Pkinase                  | superfamily_Protein kinase-like (PK-like)                                                     | Broad |
| MAP2K7/OTTHUMT00000267981  | GO:0004672                                                                                                                               | HMMPfam_Pkinase                  | superfamily_Protein kinase-like (PK-like)                                                     | BCM   |
| MAP3K1/OTTHUMT00000132309  | GO:0004672<br>GO:0008270                                                                                                                 | HMMPfam_Pkinase<br>HMMPfam_SWIM  | superfamily_ARM repeat<br>superfamily_Protein kinase-like (PK-like)<br>superfamily_RING/U-box | Broad |
| MAP3K10/ENST00000253055    | GO:0004672                                                                                                                               | HMMPfam_Pkinase<br>HMMPfam_SH3_1 | superfamily_Protein kinase-like (PK-like)<br>superfamily_SH3-domain                           | WU    |
| MAP3K11/ENST00000309100    | GO:0004672                                                                                                                               | HMMPfam_Pkinase<br>HMMPfam_SH3_1 | superfamily_Protein kinase-like (PK-like)<br>superfamily_SH3-domain                           | BCM   |
| MAP3K12/OTTHUMT00000261165 | GO:0004672                                                                                                                               | HMMPfam_Pkinase                  | superfamily_Protein kinase-like (PK-like)                                                     | BCM   |
| MAP3K13/ENST00000265026    | GO:0004672                                                                                                                               | HMMPfam_Pkinase                  | superfamily_Protein kinase-like (PK-like)                                                     | BCM   |

|                            |                          |                                  |                                                                                                                         |       |
|----------------------------|--------------------------|----------------------------------|-------------------------------------------------------------------------------------------------------------------------|-------|
| MAP3K14/OTTHUMT00000283229 | GO:0004672               | HMMPfam_Pkinase                  | superfamily_Protein kinase-like (PK-like)                                                                               | WU    |
| MAP3K15/ENST00000338883    | GO:0004672               | HMMPfam_Pkinase                  | superfamily_Protein kinase-like (PK-like)                                                                               | BCM   |
| MAP3K2/ENST00000344908     | GO:0004672               | HMMPfam_PB1<br>HMMPfam_Pkinase   | superfamily_CAD PB1 domains<br>superfamily_Protein kinase-like (PK-like)                                                | BCM   |
| MAP3K3/ENST00000361357     | GO:0004672               | HMMPfam_PB1<br>HMMPfam_Pkinase   | superfamily_CAD PB1 domains<br>superfamily_Protein kinase-like (PK-like)                                                | Broad |
| MAP3K4/ENST00000265125     | GO:0004672               | HMMPfam_Pkinase                  | superfamily_Protein kinase-like (PK-like)                                                                               | Broad |
| MAP3K5/ENST00000359015     | GO:0004672               | HMMPfam_Pkinase                  | superfamily_Protein kinase-like (PK-like)<br>superfamily_SAM/Pointed domain                                             | WU    |
| MAP3K6/ENST00000357582     | GO:0004672               | HMMPfam_Pkinase                  | superfamily_Protein kinase-like (PK-like)<br>superfamily_SAM/Pointed domain<br>superfamily_TPR-like                     | Broad |
| MAP3K7/ENST00000369329     | GO:0004672               | HMMPfam_Pkinase                  | superfamily_Protein kinase-like (PK-like)                                                                               | BCM   |
| MAP3K8/ENST00000375328     | GO:0004672               | HMMPfam_Pkinase                  | superfamily_Protein kinase-like (PK-like)                                                                               | Broad |
| MAP3K9/OTTHUMT0000072328   | GO:0004672               | HMMPfam_Pkinase<br>HMMPfam_SH3_1 | superfamily_Protein kinase-like (PK-like)<br>superfamily_Regulator of G-protein signaling RGS<br>superfamily_SH3-domain | WU    |
| MAP4K1/ENST00000221409     | GO:0004672<br>GO:0005083 | HMMPfam_CNH<br>HMMPfam_Pkinase   | superfamily_Protein kinase-like (PK-like)                                                                               | WU    |
| MAP4K3/ENST00000378758     | GO:0004672<br>GO:0005083 | HMMPfam_CNH<br>HMMPfam_Pkinase   | superfamily_Protein kinase-like (PK-like)                                                                               | Broad |
| MAP4K4/ENST00000324219     | GO:0004672<br>GO:0005083 | HMMPfam_CNH<br>HMMPfam_Pkinase   | superfamily_Protein kinase-like (PK-like)                                                                               | WU    |
| MAP4K5/NM_198794           | GO:0004672<br>GO:0005083 | HMMPfam_CNH<br>HMMPfam_Pkinase   | superfamily_Protein kinase-like (PK-like)                                                                               | Broad |
| MAPK1/ENST00000215832      | GO:0004672               | HMMPfam_Pkinase                  | superfamily_Protein kinase-like (PK-like)                                                                               | BCM   |
| MAPK10/ENST00000359221     | GO:0004672               | HMMPfam_Pkinase                  | superfamily_Protein kinase-like (PK-like)                                                                               | WU    |
| MAPK11/ENST00000330651     | GO:0004672               | HMMPfam_Pkinase                  | superfamily_Protein kinase-like (PK-like)                                                                               | WU    |
| MAPK12/ENST00000215659     | GO:0004672               | HMMPfam_Pkinase                  | superfamily_Protein kinase-like (PK-like)                                                                               | WU    |
| MAPK13/ENST00000358332     | GO:0004672               | HMMPfam_Pkinase                  | superfamily_Protein kinase-like (PK-like)                                                                               | BCM   |
| MAPK14/ENST00000229794     | GO:0004672               | HMMPfam_Pkinase                  | superfamily_Protein kinase-like (PK-like)                                                                               | BCM   |
| MAPK15/ENST00000322233     | GO:0004672               | HMMPfam_Pkinase                  | superfamily_Protein kinase-like (PK-like)                                                                               | Broad |

|                          |                                        |                                                                        |                                                                                                       |       |
|--------------------------|----------------------------------------|------------------------------------------------------------------------|-------------------------------------------------------------------------------------------------------|-------|
| MAPK3/ENST00000263025    | GO:0004672                             | HMMPfam_Pkinase                                                        | superfamily_Protein kinase-like (PK-like)                                                             | Broad |
| MAPK4/NM_002747          | GO:0004672                             | HMMPfam_Pkinase                                                        | superfamily_Protein kinase-like (PK-like)                                                             | Broad |
| MAPK6/ENST00000261845    | GO:0004672                             | HMMPfam_Pkinase                                                        | superfamily_Protein kinase-like (PK-like)                                                             | BCM   |
| MAPK7/ENST00000299612    | GO:0004672                             | HMMPfam_Pkinase                                                        | superfamily_Protein kinase-like (PK-like)                                                             | WU    |
| MAPK8/ENST00000374189    | GO:0004672                             | HMMPfam_Pkinase                                                        | superfamily_Protein kinase-like (PK-like)                                                             | WU    |
| MAPK9/ENST00000347470    | GO:0004672                             | HMMPfam_Pkinase                                                        | superfamily_Protein kinase-like (PK-like)                                                             | Broad |
| MAPKAPK3/ENST00000357955 | GO:0004672                             | HMMPfam_Pkinase                                                        | superfamily_Protein kinase-like (PK-like)                                                             | WU    |
| MAST1/ENST00000251472    | GO:0005515<br>GO:0004672<br>GO:0004674 | HMMPfam_DUF1908<br>HMMPfam_PDZ<br>HMMPfam_Pkinase<br>HMMPfam_Pkinase_C | superfamily_PDZ domain-like<br>superfamily_Protein kinase-like (PK-like)                              | BCM   |
| MAST2/ENST00000361297    | GO:0005515<br>GO:0004672<br>GO:0004674 | HMMPfam_DUF1908<br>HMMPfam_PDZ<br>HMMPfam_Pkinase<br>HMMPfam_Pkinase_C | superfamily_PDZ domain-like<br>superfamily_Protein kinase-like (PK-like)                              | WU    |
| MAST3/ENST00000262811    | GO:0005515<br>GO:0004672<br>GO:0004674 | HMMPfam_DUF1908<br>HMMPfam_PDZ<br>HMMPfam_Pkinase<br>HMMPfam_Pkinase_C | superfamily_PDZ domain-like<br>superfamily_Protein kinase-like (PK-like)                              | BCM   |
| MAST4/ENST00000261569    | GO:0005515<br>GO:0004672<br>GO:0004674 | HMMPfam_DUF1908<br>HMMPfam_PDZ<br>HMMPfam_Pkinase<br>HMMPfam_Pkinase_C | superfamily_PDZ domain-like<br>superfamily_Protein kinase-like (PK-like)                              | WU    |
| MASTL/ENST00000375940    | GO:0004672                             | HMMPfam_Pkinase                                                        | superfamily_Protein kinase-like (PK-like)                                                             | Broad |
| MATK/ENST00000315548     | GO:0007242<br>GO:0004713               | HMMPfam_Pkinase_Tyr<br>HMMPfam_SH2<br>HMMPfam_SH3_1                    | superfamily_Protein kinase-like (PK-like)<br>superfamily_SH2 domain<br>superfamily_SH3-domain         | BCM   |
| MDM2/OTTHUMT00000261845  | GO:0005622<br>GO:0005634               | HMMPfam_SWIB<br>HMMPfam_zf-RanBP                                       | superfamily_RING/U-box<br>superfamily_SWIB/MDM2 domain<br>superfamily_Znf265 first zinc-finger domain | Broad |
| MDM4/ENST00000367183     | GO:0005634                             | HMMPfam_SWIB                                                           | superfamily_RING/U-box<br>superfamily_SWIB/MDM2 domain<br>superfamily_Znf265 first zinc-finger domain | Broad |

|                          |                                                      |                                                                                                  |                                                                                                                                                                   |       |
|--------------------------|------------------------------------------------------|--------------------------------------------------------------------------------------------------|-------------------------------------------------------------------------------------------------------------------------------------------------------------------|-------|
| MEN1/ENST00000337652     | GO:0005634                                           | HMMPfam_Menin                                                                                    |                                                                                                                                                                   | BCM   |
| MERTK/ENST00000295408    | GO:0004713                                           | HMMPfam_Pkinase_Tyr<br>HMMPfam_fn3<br>HMMPfam_ig                                                 | superfamily_Fibronectin type III<br>superfamily_Immunoglobulin<br>superfamily_Protein kinase-like (PK-like)<br>superfamily_Rhodanese/Cell cycle control phosphata | WU    |
| MET/ENST00000318493      | GO:0004713<br>GO:0004872                             | HMMPfam_PSI<br>HMMPfam_Pkinase_Tyr<br>HMMPfam_Sema<br>HMMPfam_TIG                                | superfamily_E set domains<br>superfamily_Plexin repeat<br>superfamily_Protein kinase-like (PK-like)<br>superfamily_Sema domain                                    | SHARE |
| MGC16703/ENST00000292748 |                                                      | HMMPfam_Tubulin                                                                                  | superfamily_RNI-like<br>superfamily_Tubulin nucleotide-binding domain-like                                                                                        | BCM   |
| MINK1/ENST00000355280    | GO:0004672<br>GO:0005083                             | HMMPfam_CNH<br>HMMPfam_Pkinase                                                                   | superfamily_Protein kinase-like (PK-like)                                                                                                                         | Broad |
| MKNK1/ENST00000371946    | GO:0004672                                           | HMMPfam_Pkinase                                                                                  | superfamily_Protein kinase-like (PK-like)                                                                                                                         | WU    |
| MKNK2/ENST00000250896    | GO:0004672                                           | HMMPfam_Pkinase                                                                                  | superfamily_Protein kinase-like (PK-like)                                                                                                                         | BCM   |
| MLH1/ENST00000231790     | GO:0005524                                           | HMMPfam_DNA_mis_repair<br>HMMPfam_HATPase_c                                                      | superfamily_ATPase domain of HSP90 chaperone/DNA t<br>superfamily_Ribosomal protein S5 domain 2-like                                                              | WU    |
| MLKL/ENST00000389390     | GO:0004672                                           | HMMPfam_Pkinase                                                                                  | superfamily_Protein kinase-like (PK-like)                                                                                                                         | BCM   |
| MLL/ENST00000359313      | GO:0003677<br>GO:0005634<br>GO:0005515<br>GO:0008270 | HMMPfam_AT_hook<br>HMMPfam_FYRC<br>HMMPfam_FYRN<br>HMMPfam_PHD<br>HMMPfam_SET<br>HMMPfam_zf-CXXC | superfamily_Bromodomain<br>superfamily_FYVE/PHD zinc finger<br>superfamily_SET domain                                                                             | BCM   |
| MON1A/ENST00000296473    | GO:0006810                                           | HMMPfam_DUF254                                                                                   | superfamily_SNARE-like                                                                                                                                            | WU    |
| MOS/ENST00000311923      | GO:0004672                                           | HMMPfam_Pkinase                                                                                  | superfamily_Protein kinase-like (PK-like)                                                                                                                         | BCM   |
| MPL/ENST00000372470      |                                                      | HMMPfam_EpoR_lig-bind<br>HMMPfam_fn3                                                             | superfamily_Fibronectin type III                                                                                                                                  | WU    |
| MRAS/ENST00000289104     |                                                      | HMMPfam_Ras                                                                                      | superfamily_P-loop containing nucleoside triphosph                                                                                                                | Broad |
| MSH2/ENST00000233146     | GO:0005524<br>GO:0003684                             | HMMPfam_MutS_I<br>HMMPfam_MutS_II<br>HMMPfam_MutS_III<br>HMMPfam_MutS_IV                         | superfamily_DNA repair protein MutS domain II<br>superfamily_DNA repair protein MutS domain III<br>superfamily_P-loop containing nucleoside triphosph             | WU    |

|                          |                          |                                                                                                            |                                                                                                                                                                                                                                     |       |
|--------------------------|--------------------------|------------------------------------------------------------------------------------------------------------|-------------------------------------------------------------------------------------------------------------------------------------------------------------------------------------------------------------------------------------|-------|
|                          |                          | HMMPfam_MutS_V                                                                                             |                                                                                                                                                                                                                                     |       |
| MSH6/ENST00000234420     | GO:0005524<br>GO:0003684 | HMMPfam_MutS_I<br>HMMPfam_MutS_II<br>HMMPfam_MutS_III<br>HMMPfam_MutS_IV<br>HMMPfam_MutS_V<br>HMMPfam_PWWP | superfamily_DNA repair protein MutS domain I<br>superfamily_DNA repair protein MutS domain II<br>superfamily_DNA repair protein MutS domain III<br>superfamily_P-loop containing nucleoside triphosph<br>superfamily_Tudor/PWWP/MBT | WU    |
| MST1/ENST00000389186     | GO:0004252               | HMMPfam_Kringle<br>HMMPfam_PAN_1<br>HMMPfam_Trypsin                                                        | superfamily_Hairpin loop containing domain-like<br>superfamily_Kringle-like<br>superfamily_Trypsin-like serine proteases                                                                                                            | WU    |
| MST1R/ENST00000296474    | GO:0004713<br>GO:0004872 | HMMPfam_PSI<br>HMMPfam_Pkinase_Tyr<br>HMMPfam_Sema<br>HMMPfam_TIG                                          | superfamily_E set domains<br>superfamily_Plexin repeat<br>superfamily_Protein kinase-like (PK-like)<br>superfamily_Sema domain                                                                                                      | WU    |
| MST4/NM_016542           | GO:0004672               | HMMPfam_Pkinase                                                                                            | superfamily_Protein kinase-like (PK-like)                                                                                                                                                                                           | WU    |
| MUSK/ENST00000374448     | GO:0004713               | HMMPfam_Fz<br>HMMPfam_I-set<br>HMMPfam_Pkinase_Tyr                                                         | superfamily_Frizzled cysteine-rich domain<br>superfamily_Immunoglobulin<br>superfamily_Protein kinase-like (PK-like)                                                                                                                | Broad |
| MYB/ENST00000341911      | GO:0030528               | HMMPfam_Cmyb_C<br>HMMPfam_Myb_DNA-binding<br>HMMPfam_Wos2                                                  | superfamily_Homeodomain-like                                                                                                                                                                                                        | WU    |
| MYBL1/OTTHUMT00000274404 | GO:0030528               | HMMPfam_Cmyb_C<br>HMMPfam_Myb_DNA-binding<br>HMMPfam_Wos2                                                  | superfamily_Homeodomain-like                                                                                                                                                                                                        | BCM   |
| MYBL2/ENST00000217026    |                          | HMMPfam_Cmyb_C<br>HMMPfam_Myb_DNA-binding                                                                  | superfamily_Homeodomain-like                                                                                                                                                                                                        | WU    |
| MYC/ENST00000377970      | GO:0005634<br>GO:0003700 | HMMPfam_HLH<br>HMMPfam_Myc-LZ<br>HMMPfam_Myc_N                                                             | superfamily_HLH helix-loop-helix DNA-binding domai                                                                                                                                                                                  | BCM   |
| MYCL1/ENST00000334282    | GO:0005634<br>GO:0003700 | HMMPfam_HLH<br>HMMPfam_Myc_N                                                                               | superfamily_HLH helix-loop-helix DNA-binding domai                                                                                                                                                                                  | WU    |
| MYCN/ENST00000281043     | GO:0005634<br>GO:0003700 | HMMPfam_HLH<br>HMMPfam_Myc_N                                                                               | superfamily_HLH helix-loop-helix DNA-binding domai                                                                                                                                                                                  | Broad |

|                        |                                        |                                                                                              |                                                                                                                                         |       |
|------------------------|----------------------------------------|----------------------------------------------------------------------------------------------|-----------------------------------------------------------------------------------------------------------------------------------------|-------|
| MYO3A/ENST00000265944  | GO:0003774<br>GO:0004672               | HMMPfam_IQ<br>HMMPfam_Myosin_head<br>HMMPfam_Pkinase                                         | superfamily_P-loop containing nucleoside triphosph<br>superfamily_Protein kinase-like (PK-like)                                         | Broad |
| MYO3B/ENST00000263810  | GO:0003774<br>GO:0004672               | HMMPfam_IQ<br>HMMPfam_Myosin_head<br>HMMPfam_Pkinase                                         | superfamily_P-loop containing nucleoside triphosph<br>superfamily_Protein kinase-like (PK-like)                                         | WU    |
| MYT1/NM_004535         | GO:0003700                             | HMMPfam_MYT1<br>HMMPfam_zf-C2HC                                                              | superfamily_CCHHC domain                                                                                                                | BCM   |
| NCK1/ENST00000288986   | GO:0007242                             | HMMPfam_SH2<br>HMMPfam_SH3_1                                                                 | superfamily_SH2 domain<br>superfamily_SH3-domain                                                                                        | Broad |
| NCK2/ENST00000233154   | GO:0007242                             | HMMPfam_SH2<br>HMMPfam_SH3_1                                                                 | superfamily_SH2 domain<br>superfamily_SH3-domain                                                                                        | WU    |
| NCYM/ENST00000307384   | GO:0007275                             |                                                                                              |                                                                                                                                         | Broad |
| NF1/ENST00000358273    | GO:0005096                             | HMMPfam_RasGAP                                                                               | superfamily_ARM repeat<br>superfamily_CRAL/TRIO domain<br>superfamily_GTPase activation domain GAP                                      | WU    |
| NF2/ENST00000334961    | GO:0005737<br>GO:0005856               | HMMPfam_Band_41<br>HMMPfam_ERM                                                               | superfamily_Moesin tail domain<br>superfamily_PH domain-like<br>superfamily_Second domain of FERM<br>superfamily_Ubiquitin-like         | Broad |
| NFKB1/ENST00000226574  | GO:0005515<br>GO:0003700               | HMMPfam_Ank<br>HMMPfam_Death<br>HMMPfam_RHD<br>HMMPfam_TIG                                   | superfamily_Ankyrin repeat<br>superfamily_DEATH domain<br>superfamily_E set domains<br>superfamily_p53-like transcription factors       | BCM   |
| NLK/OTTHUMT00000281110 | GO:0004672                             | HMMPfam_Pkinase                                                                              | superfamily_Protein kinase-like (PK-like)                                                                                               | WU    |
| NOTCH1/ENST00000277541 | GO:0007219<br>GO:0016021<br>GO:0016020 | HMMPfam_Ank<br>HMMPfam_EGF<br>HMMPfam_EGF_CA<br>HMMPfam_NOD<br>HMMPfam_NODP<br>HMMPfam_Notch | superfamily_Ankyrin repeat<br>superfamily_Concanavalin A-like lectins/glucanases<br>superfamily_EGF/Laminin<br>superfamily_Notch domain | WU    |
| NOTCH2/ENST00000256646 | GO:0007219<br>GO:0016021               | HMMPfam_Ank<br>HMMPfam_EGF                                                                   | superfamily_Ankyrin repeat<br>superfamily_EGF/Laminin                                                                                   | BCM   |

|                        |                                        |                                                                                                               |                                                                                                                                         |       |
|------------------------|----------------------------------------|---------------------------------------------------------------------------------------------------------------|-----------------------------------------------------------------------------------------------------------------------------------------|-------|
|                        | GO:0016020                             | HMMPfam_EGF_CA<br>HMMPfam_NOD<br>HMMPfam_NODP<br>HMMPfam_Notch                                                | superfamily_Notch domain                                                                                                                |       |
| NOTCH2NL/NM_203458     |                                        | HMMPfam_EGF<br>HMMPfam_EGF_CA                                                                                 | superfamily_EGF/Laminin                                                                                                                 | Broad |
| NOTCH3/ENST00000263388 | GO:0007219<br>GO:0016021<br>GO:0016020 | HMMPfam_Ank<br>HMMPfam_EGF<br>HMMPfam_EGF_2<br>HMMPfam_EGF_CA<br>HMMPfam_NOD<br>HMMPfam_NODP<br>HMMPfam_Notch | superfamily_Ankyrin repeat<br>superfamily_EGF/Laminin<br>superfamily_Notch domain                                                       | BCM   |
| NOTCH4/ENST00000375023 | GO:0007219<br>GO:0016020               | HMMPfam_Ank<br>HMMPfam_EGF<br>HMMPfam_EGF_CA<br>HMMPfam_NODP<br>HMMPfam_Notch                                 | superfamily_Ankyrin repeat<br>superfamily_Concanavalin A-like lectins/glucanases<br>superfamily_EGF/Laminin<br>superfamily_Notch domain | BCM   |
| NRAS/ENST00000369533   | GO:0003677                             | HMMPfam_CSD                                                                                                   | superfamily_Nucleic acid-binding proteins                                                                                               | SHARE |
| NRK/ENST00000243300    | GO:0004672<br>GO:0005083               | HMMPfam_CNH<br>HMMPfam_Pkinase                                                                                | superfamily_Protein kinase-like (PK-like)<br>superfamily_p53-like transcription factors                                                 | Broad |
| NTRK1/ENST00000358660  | GO:0005515<br>GO:0004713               | HMMPfam_LRR_1<br>HMMPfam_Pkinase_Tyr                                                                          | superfamily_Immunoglobulin<br>superfamily_L domain-like<br>superfamily_Protein kinase-like (PK-like)                                    | SHARE |
| NTRK2/ENST00000376214  | GO:0005515<br>GO:0004713               | HMMPfam_I-set<br>HMMPfam_LRRNT<br>HMMPfam_LRR_1<br>HMMPfam_Pkinase_Tyr                                        | superfamily_Immunoglobulin<br>superfamily_L domain-like<br>superfamily_Protein kinase-like (PK-like)                                    | SHARE |
| NTRK3/ENST00000360948  | GO:0005515<br>GO:0004713               | HMMPfam_I-set<br>HMMPfam_LRRNT<br>HMMPfam_LRR_1<br>HMMPfam_Pkinase_Tyr<br>HMMPfam_ig                          | superfamily_Immunoglobulin<br>superfamily_L domain-like<br>superfamily_Protein kinase-like (PK-like)                                    | SHARE |

|                           |                                                                                  |                                                    |                                                                                                |       |
|---------------------------|----------------------------------------------------------------------------------|----------------------------------------------------|------------------------------------------------------------------------------------------------|-------|
| OSR1/OTTHUMT00000264162   | GO:0004672                                                                       | HMMPfam_Pkinase                                    | superfamily_Protein kinase-like (PK-like)                                                      | Broad |
| P2RXL1/OTTHUMT00000074974 | GO:0004872                                                                       | HMMPfam_P2X_receptor                               |                                                                                                | BCM   |
| P2RY5/ENST00000378434     | GO:0001584                                                                       | HMMPfam_7tm_1                                      | superfamily_Family A G protein-coupled receptor-li                                             | Broad |
| PAK1/ENST00000278568      | GO:0004672                                                                       | HMMPfam_PBD<br>HMMPfam_Pkinase                     | superfamily_Protein kinase-like (PK-like)<br>superfamily_Wiscott-Aldrich syndrome protein WASP | Broad |
| PAK2/ENST00000327134      | GO:0004672                                                                       | HMMPfam_PBD<br>HMMPfam_Pkinase                     | superfamily_Protein kinase-like (PK-like)<br>superfamily_Wiscott-Aldrich syndrome protein WASP | Broad |
| PAK3/ENST00000360648      | GO:0004672                                                                       | HMMPfam_PBD<br>HMMPfam_Pkinase                     | superfamily_Protein kinase-like (PK-like)                                                      | Broad |
| PAK4/ENST00000358301      | GO:0004672                                                                       | HMMPfam_PBD<br>HMMPfam_Pkinase                     | superfamily_Protein kinase-like (PK-like)                                                      | WU    |
| PAK6/ENST00000260404      | GO:0004672                                                                       | HMMPfam_PBD<br>HMMPfam_Pkinase                     | superfamily_Protein kinase-like (PK-like)                                                      | WU    |
| PAK7/ENST00000378429      | GO:0004672                                                                       | HMMPfam_PBD<br>HMMPfam_Pkinase                     | superfamily_Protein kinase-like (PK-like)                                                      | BCM   |
| PASK/ENST00000358649      | GO:0004672<br>GO:0006355                                                         | HMMPfam_PAS<br>HMMPfam_Pkinase                     | superfamily_PYP-like sensor domain (PAS domain)<br>superfamily_Protein kinase-like (PK-like)   | BCM   |
| PCQAP/ENST00000263205     | GO:0005737<br>GO:0005634<br>GO:0045735<br>GO:0006355<br>GO:0005199<br>GO:0006350 |                                                    |                                                                                                | BCM   |
| PCTK1/ENST00000276052     | GO:0004672                                                                       | HMMPfam_Pkinase                                    | superfamily_Protein kinase-like (PK-like)                                                      | Broad |
| PCTK2/ENST00000261211     | GO:0004672                                                                       | HMMPfam_Pkinase                                    | superfamily_Protein kinase-like (PK-like)                                                      | WU    |
| PCTK3/ENST00000343606     | GO:0004672                                                                       | HMMPfam_Pkinase                                    | superfamily_Protein kinase-like (PK-like)                                                      | Broad |
| PDGFB/ENST00000331163     | GO:0008083                                                                       | HMMPfam_PDGF<br>HMMPfam_PDGF_N                     | superfamily_Cystine-knot cytokines                                                             | Broad |
| PDGFRA/ENST00000257290    | GO:0004713                                                                       | HMMPfam_I-set<br>HMMPfam_Pkinase_Tyr<br>HMMPfam_ig | superfamily_Immunoglobulin<br>superfamily_Protein kinase-like (PK-like)                        | SHARE |
| PDGFRB/ENST00000261799    | GO:0004713                                                                       | HMMPfam_Pkinase_Tyr<br>HMMPfam_ig                  | superfamily_Immunoglobulin<br>superfamily_Protein kinase-like (PK-like)                        | SHARE |



|                          |                                                      |                                                                                                            |                                                                                                                                                                                  |       |
|--------------------------|------------------------------------------------------|------------------------------------------------------------------------------------------------------------|----------------------------------------------------------------------------------------------------------------------------------------------------------------------------------|-------|
| PDK1/ENST00000282077     | GO:0005524                                           | HMMPfam_HATPase_c                                                                                          | superfamily_ATPase domain of HSP90 chaperone/DNA t<br>superfamily_alpha-ketoacid dehydrogenase kinase N-                                                                         | WU    |
| PEBP1/OTTHUMT00000262864 |                                                      | HMMPfam_PBP                                                                                                | superfamily_PEBP-like                                                                                                                                                            | Broad |
| PFTK1/ENST00000306129    | GO:0004672                                           | HMMPfam_Pkinase                                                                                            | superfamily_Protein kinase-like (PK-like)                                                                                                                                        | BCM   |
| PHOX2B/ENST00000381741   | GO:0003700                                           | HMMPfam_Homeobox                                                                                           | superfamily_Homeodomain-like                                                                                                                                                     | BCM   |
| PIK3C2A/ENST00000265970  | GO:0004428<br>GO:0005942<br>GO:0016773<br>GO:0005515 | HMMPfam_C2<br>HMMPfam_PI3K_C2<br>HMMPfam_PI3K_rbd<br>HMMPfam_PI3Ka<br>HMMPfam_PI3_PI4_kinase<br>HMMPfam_PX | superfamily_ARM repeat<br>superfamily_C2 domain (Calcium/lipid-binding domai<br>superfamily_PX domain<br>superfamily_Protein kinase-like (PK-like)<br>superfamily_Ubiquitin-like | SHARE |
| PIK3C2B/ENST00000367187  | GO:0004428<br>GO:0005942<br>GO:0016773<br>GO:0005515 | HMMPfam_C2<br>HMMPfam_PI3K_C2<br>HMMPfam_PI3K_rbd<br>HMMPfam_PI3Ka<br>HMMPfam_PI3_PI4_kinase<br>HMMPfam_PX | superfamily_ARM repeat<br>superfamily_C2 domain (Calcium/lipid-binding domai<br>superfamily_PX domain<br>superfamily_Protein kinase-like (PK-like)<br>superfamily_Ubiquitin-like | Broad |
| PIK3C2G/ENST00000266497  | GO:0004428<br>GO:0005942<br>GO:0016773<br>GO:0005515 | HMMPfam_C2<br>HMMPfam_PI3K_C2<br>HMMPfam_PI3K_rbd<br>HMMPfam_PI3Ka<br>HMMPfam_PI3_PI4_kinase<br>HMMPfam_PX | superfamily_ARM repeat<br>superfamily_C2 domain (Calcium/lipid-binding domai<br>superfamily_PX domain<br>superfamily_Protein kinase-like (PK-like)<br>superfamily_Ubiquitin-like | WU    |
| PIK3C3/ENST00000262039   | GO:0004428<br>GO:0005942<br>GO:0016773               | HMMPfam_PI3K_C2<br>HMMPfam_PI3Ka<br>HMMPfam_PI3_PI4_kinase                                                 | superfamily_ARM repeat<br>superfamily_C2 domain (Calcium/lipid-binding domai<br>superfamily_Protein kinase-like (PK-like)                                                        | Broad |
| PIK3CA/ENST00000263967   | GO:0004428<br>GO:0005942<br>GO:0016773               | HMMPfam_PI3K_C2<br>HMMPfam_PI3K_p85B<br>HMMPfam_PI3K_rbd<br>HMMPfam_PI3Ka<br>HMMPfam_PI3_PI4_kinase        | superfamily_ARM repeat<br>superfamily_C2 domain (Calcium/lipid-binding domai<br>superfamily_Protein kinase-like (PK-like)<br>superfamily_Ubiquitin-like                          | BCM   |
| PIK3CB/ENST00000289153   | GO:0004428<br>GO:0005942                             | HMMPfam_PI3K_C2<br>HMMPfam_PI3K_p85B                                                                       | superfamily_ARM repeat<br>superfamily_C2 domain (Calcium/lipid-binding domai                                                                                                     | Broad |

|                        |                                        |                                                                                                     |                                                                                                                                                         |       |
|------------------------|----------------------------------------|-----------------------------------------------------------------------------------------------------|---------------------------------------------------------------------------------------------------------------------------------------------------------|-------|
|                        | GO:0016773                             | HMMPfam_PI3K_rbd<br>HMMPfam_PI3Ka<br>HMMPfam_PI3_PI4_kinase                                         | superfamily_Protein kinase-like (PK-like)<br>superfamily_Ubiquitin-like                                                                                 |       |
| PIK3CD/ENST00000361110 | GO:0004428<br>GO:0005942<br>GO:0016773 | HMMPfam_PI3K_C2<br>HMMPfam_PI3K_p85B<br>HMMPfam_PI3K_rbd<br>HMMPfam_PI3Ka<br>HMMPfam_PI3_PI4_kinase | superfamily_ARM repeat<br>superfamily_C2 domain (Calcium/lipid-binding domai<br>superfamily_Protein kinase-like (PK-like)<br>superfamily_Ubiquitin-like | BCM   |
| PIK3CG/ENST00000359195 | GO:0004428<br>GO:0005942<br>GO:0016773 | HMMPfam_PI3K_C2<br>HMMPfam_PI3K_rbd<br>HMMPfam_PI3Ka<br>HMMPfam_PI3_PI4_kinase                      | superfamily_ARM repeat<br>superfamily_C2 domain (Calcium/lipid-binding domai<br>superfamily_Protein kinase-like (PK-like)<br>superfamily_Ubiquitin-like | BCM   |
| PIK3R1/ENST00000274335 | GO:0003924<br>GO:0005622<br>GO:0007242 | HMMPfam_RhoGAP<br>HMMPfam_SH2<br>HMMPfam_SH3_1                                                      | superfamily_GTPase activation domain GAP<br>superfamily_Interferon-induced guanylate-binding p<br>superfamily_SH2 domain<br>superfamily_SH3-domain      | WU    |
| PIK3R2/ENST00000222254 | GO:0005622<br>GO:0007242               | HMMPfam_RhoGAP<br>HMMPfam_SH2<br>HMMPfam_SH3_1                                                      | superfamily_GTPase activation domain GAP<br>superfamily_SH2 domain<br>superfamily_SH3-domain                                                            | BCM   |
| PIK3R3/ENST00000372006 | GO:0007242                             | HMMPfam_SH2                                                                                         | superfamily_SH2 domain                                                                                                                                  | WU    |
| PIK3R4/ENST00000356763 | GO:0004672                             | HMMPfam_HEAT<br>HMMPfam_Pkinase<br>HMMPfam_WD40                                                     | superfamily_ARM repeat<br>superfamily_Protein kinase-like (PK-like)<br>superfamily_WD40 repeat-like                                                     | Broad |
| PIK4CA/ENST00000255882 | GO:0004428<br>GO:0016773               | HMMPfam_PI3Ka<br>HMMPfam_PI3_PI4_kinase                                                             | superfamily_ADP-ribosylation<br>superfamily_ARM repeat<br>superfamily_Protein kinase-like (PK-like)                                                     | BCM   |
| PIM1/ENST00000373507   | GO:0004672                             | HMMPfam_Pkinase                                                                                     | superfamily_Protein kinase-like (PK-like)                                                                                                               | BCM   |
| PIM2/ENST00000376509   | GO:0004672                             | HMMPfam_Pkinase                                                                                     | superfamily_Protein kinase-like (PK-like)                                                                                                               | Broad |
| PIM3/ENST00000360612   | GO:0004672                             | HMMPfam_Pkinase                                                                                     | superfamily_Protein kinase-like (PK-like)                                                                                                               | WU    |
| PINX1/ENST00000314787  | GO:0003676                             | HMMPfam_G-patch                                                                                     |                                                                                                                                                         | Broad |
| PKN1/ENST00000342216   | GO:0005622<br>GO:0004672<br>GO:0004674 | HMMPfam_HR1<br>HMMPfam_Pkinase<br>HMMPfam_Pkinase_C                                                 | superfamily_C2 domain (Calcium/lipid-binding domai<br>superfamily_HR1 repeat<br>superfamily_Protein kinase-like (PK-like)                               | BCM   |

|                         |                                        |                                                                                                  |                                                                                                                                                                                                          |       |
|-------------------------|----------------------------------------|--------------------------------------------------------------------------------------------------|----------------------------------------------------------------------------------------------------------------------------------------------------------------------------------------------------------|-------|
| PKN2/ENST00000370521    | GO:0005622<br>GO:0004672<br>GO:0004674 | HMMPfam_HR1<br>HMMPfam_Pkinase<br>HMMPfam_Pkinase_C                                              | superfamily_C2 domain (Calcium/lipid-binding domain)<br>superfamily_HR1 repeat<br>superfamily_Protein kinase-like (PK-like)                                                                              | Broad |
| PKN3/ENST00000291906    | GO:0005622<br>GO:0004672<br>GO:0004674 | HMMPfam_HR1<br>HMMPfam_Pkinase<br>HMMPfam_Pkinase_C                                              | superfamily_C2 domain (Calcium/lipid-binding domain)<br>superfamily_HR1 repeat<br>superfamily_Protein kinase-like (PK-like)                                                                              | WU    |
| PLCG1/ENST00000373272   | GO:0007242<br>GO:0004435<br>GO:0004629 | HMMPfam_C2<br>HMMPfam_PH<br>HMMPfam_PI-PLC-X<br>HMMPfam_PI-PLC-Y<br>HMMPfam_SH2<br>HMMPfam_SH3_1 | superfamily_C2 domain (Calcium/lipid-binding domain)<br>superfamily_EF-hand<br>superfamily_PH domain-like<br>superfamily_PLC-like phosphodiesterases<br>superfamily_SH2 domain<br>superfamily_SH3-domain | WU    |
| PLCG2/ENST00000359376   | GO:0007242<br>GO:0004435<br>GO:0004629 | HMMPfam_C2<br>HMMPfam_PH<br>HMMPfam_PI-PLC-X<br>HMMPfam_PI-PLC-Y<br>HMMPfam_SH2<br>HMMPfam_SH3_1 | superfamily_C2 domain (Calcium/lipid-binding domain)<br>superfamily_EF-hand<br>superfamily_PH domain-like<br>superfamily_PLC-like phosphodiesterases<br>superfamily_SH2 domain<br>superfamily_SH3-domain | BCM   |
| PRKAB1/ENST00000229328  | GO:0004553                             | HMMPfam_AMPKBI<br>HMMPfam_Isoamylase_N                                                           | superfamily_E set domains                                                                                                                                                                                | Broad |
| PRKACA/ENST00000308677  | GO:0004672<br>GO:0004674               | HMMPfam_Pkinase<br>HMMPfam_Pkinase_C                                                             | superfamily_Protein kinase-like (PK-like)                                                                                                                                                                | BCM   |
| PRKACB/ENST00000370685  | GO:0004672                             | HMMPfam_Pkinase                                                                                  | superfamily_Protein kinase-like (PK-like)                                                                                                                                                                | Broad |
| PRKACG/ENST00000377276  | GO:0004672                             | HMMPfam_Pkinase                                                                                  | superfamily_Protein kinase-like (PK-like)                                                                                                                                                                | WU    |
| PRKAR1A/ENST00000358598 | GO:0007165                             | HMMPfam_RIIa<br>HMMPfam_cNMP_binding                                                             | superfamily_cAMP-binding domain-like                                                                                                                                                                     | Broad |
| PRKCA/ENST00000284384   | GO:0007242<br>GO:0004672<br>GO:0004674 | HMMPfam_C1_1<br>HMMPfam_C2<br>HMMPfam_Pkinase<br>HMMPfam_Pkinase_C                               | superfamily_C2 domain (Calcium/lipid-binding domain)<br>superfamily_Cysteine-rich domain<br>superfamily_Protein kinase-like (PK-like)                                                                    | Broad |
| PRKCB1/ENST00000303531  | GO:0007242<br>GO:0004672<br>GO:0004674 | HMMPfam_C1_1<br>HMMPfam_C2<br>HMMPfam_Pkinase                                                    | superfamily_C2 domain (Calcium/lipid-binding domain)<br>superfamily_Cysteine-rich domain<br>superfamily_Protein kinase-like (PK-like)                                                                    | Broad |

|                          |            |                   |                                                    |       |
|--------------------------|------------|-------------------|----------------------------------------------------|-------|
|                          |            | HMMPfam_Pkinase_C |                                                    |       |
| PRKCD/ENST00000330452    | GO:0007242 | HMMPfam_C1_1      | superfamily_C2 domain (Calcium/lipid-binding domai | BCM   |
|                          | GO:0004672 | HMMPfam_Pkinase   | superfamily_Cysteine-rich domain                   |       |
|                          | GO:0004674 | HMMPfam_Pkinase_C | superfamily_Protein kinase-like (PK-like)          |       |
| PRKCE/ENST00000306156    | GO:0007242 | HMMPfam_C1_1      | superfamily_C2 domain (Calcium/lipid-binding domai | WU    |
|                          | GO:0004672 | HMMPfam_C2        | superfamily_Cysteine-rich domain                   |       |
|                          | GO:0004674 | HMMPfam_Pkinase   | superfamily_Protein kinase-like (PK-like)          |       |
|                          |            | HMMPfam_Pkinase_C |                                                    |       |
| PRKCG/ENST00000263431    | GO:0007242 | HMMPfam_C1_1      | superfamily_C2 domain (Calcium/lipid-binding domai | BCM   |
|                          | GO:0004672 | HMMPfam_C2        | superfamily_Cysteine-rich domain                   |       |
|                          | GO:0004674 | HMMPfam_Pkinase   | superfamily_Protein kinase-like (PK-like)          |       |
|                          |            | HMMPfam_Pkinase_C |                                                    |       |
| PRKCH/ENST00000332981    | GO:0007242 | HMMPfam_C1_1      | superfamily_C2 domain (Calcium/lipid-binding domai | Broad |
|                          | GO:0004672 | HMMPfam_C2        | superfamily_Cysteine-rich domain                   |       |
|                          | GO:0004674 | HMMPfam_Pkinase   | superfamily_Protein kinase-like (PK-like)          |       |
|                          |            | HMMPfam_Pkinase_C |                                                    |       |
| PRKCI/OTTHUMT00000267042 | GO:0007242 | HMMPfam_C1_1      | superfamily_CAD PB1 domains                        | BCM   |
|                          | GO:0004672 | HMMPfam_PB1       | superfamily_Cysteine-rich domain                   |       |
|                          | GO:0004674 | HMMPfam_Pkinase   | superfamily_Protein kinase-like (PK-like)          |       |
|                          |            | HMMPfam_Pkinase_C |                                                    |       |
| PRKCQ/ENST00000263125    | GO:0007242 | HMMPfam_C1_1      | superfamily_C2 domain (Calcium/lipid-binding domai | BCM   |
|                          | GO:0004672 | HMMPfam_Pkinase   | superfamily_Cysteine-rich domain                   |       |
|                          | GO:0004674 | HMMPfam_Pkinase_C | superfamily_Protein kinase-like (PK-like)          |       |
| PRKCZ/ENST00000378567    | GO:0007242 | HMMPfam_C1_1      | superfamily_CAD PB1 domains                        | BCM   |
|                          | GO:0004672 | HMMPfam_PB1       | superfamily_Cysteine-rich domain                   |       |
|                          | GO:0004674 | HMMPfam_Pkinase   | superfamily_Protein kinase-like (PK-like)          |       |
|                          |            | HMMPfam_Pkinase_C |                                                    |       |
| PRKD1/ENST00000389985    | GO:0007242 | HMMPfam_C1_1      | superfamily_Cysteine-rich domain                   | BCM   |
|                          | GO:0004672 | HMMPfam_PH        | superfamily_PH domain-like                         |       |
|                          |            | HMMPfam_Pkinase   | superfamily_Protein kinase-like (PK-like)          |       |
| PRKD3/ENST00000379066    | GO:0007242 | HMMPfam_C1_1      | superfamily_Cysteine-rich domain                   | WU    |
|                          | GO:0004672 | HMMPfam_PH        | superfamily_PH domain-like                         |       |
|                          |            | HMMPfam_Pkinase   | superfamily_Protein kinase-like (PK-like)          |       |

|                         |                          |                                                                                         |                                                                                                                                   |       |
|-------------------------|--------------------------|-----------------------------------------------------------------------------------------|-----------------------------------------------------------------------------------------------------------------------------------|-------|
| PRKDC/ENST00000314191   | GO:0003677<br>GO:0016773 | HMMPfam_FAT<br>HMMPfam_FATC<br>HMMPfam_HEAT<br>HMMPfam_NUC194<br>HMMPfam_PI3_PI4_kinase | superfamily_ARM repeat<br>superfamily_Protein kinase-like (PK-like)<br>superfamily_TPR-like                                       | WU    |
| PRKG1/ENST00000373980   | GO:0004672               | HMMPfam_Pkinase<br>HMMPfam_cNMP_binding                                                 | superfamily_Protein kinase-like (PK-like)<br>superfamily_cAMP-binding domain-like                                                 | WU    |
| PRKG2/ENST00000264399   | GO:0004672               | HMMPfam_Pkinase<br>HMMPfam_cNMP_binding                                                 | superfamily_Protein kinase-like (PK-like)<br>superfamily_cAMP-binding domain-like                                                 | WU    |
| PRKX/ENST00000262848    | GO:0004672               | HMMPfam_Pkinase                                                                         | superfamily_Protein kinase-like (PK-like)                                                                                         | WU    |
| PRKY/ENST00000362758    | GO:0004672               | HMMPfam_Pkinase                                                                         | superfamily_Protein kinase-like (PK-like)                                                                                         | Broad |
| PTCH/ENST00000331920    | GO:0008158               | HMMPfam_Patched                                                                         | superfamily_Multidrug efflux transporter AcrB tran                                                                                | BCM   |
| PTCH2/ENST00000372192   | GO:0008158               | HMMPfam_Patched                                                                         | superfamily_Multidrug efflux transporter AcrB tran                                                                                | WU    |
| PTEN/ENST00000371953    | GO:0006470               | HMMPfam_DSPc                                                                            | superfamily_(Phosphotyrosine protein) phosphatases<br>superfamily_C2 domain (Calcium/lipid-binding domai                          | SHARE |
| PTK2/OTTHUMT00000275592 | GO:0004713               | HMMPfam_Focal_AT<br>HMMPfam_Pkinase_Tyr                                                 | superfamily_FAT domain of focal adhesion kinase<br>superfamily_Protein kinase-like (PK-like)<br>superfamily_Second domain of FERM | Broad |
| PTK2B/ENST00000346049   | GO:0004713               | HMMPfam_Focal_AT<br>HMMPfam_Pkinase_Tyr                                                 | superfamily_FAT domain of focal adhesion kinase<br>superfamily_Protein kinase-like (PK-like)<br>superfamily_Second domain of FERM | Broad |
| PTK7/ENST00000230419    | GO:0004713               | HMMPfam_I-set<br>HMMPfam_Pkinase_Tyr<br>HMMPfam_ig                                      | superfamily_Immunoglobulin<br>superfamily_Protein kinase-like (PK-like)                                                           | Broad |
| PTPN11/ENST00000351677  | GO:0007242<br>GO:0004725 | HMMPfam_SH2<br>HMMPfam_Y_phosphatase                                                    | superfamily_(Phosphotyrosine protein) phosphatases<br>superfamily_SH2 domain                                                      | SHARE |
| PTPRD/ENST00000356435   | GO:0004725               | HMMPfam_I-set<br>HMMPfam_Y_phosphatase<br>HMMPfam_fn3<br>HMMPfam_ig                     | superfamily_(Phosphotyrosine protein) phosphatases<br>superfamily_Fibronectin type III<br>superfamily_Immunoglobulin              | WU    |
| PTPRG/ENST00000295874   | GO:0004089<br>GO:0004725 | HMMPfam_Carb_anhydrase<br>HMMPfam_Y_phosphatase<br>HMMPfam_fn3                          | superfamily_(Phosphotyrosine protein) phosphatases<br>superfamily_Carbonic anhydrase<br>superfamily_Fibronectin type III          | BCM   |

|                        |            |                              |                                                    |       |
|------------------------|------------|------------------------------|----------------------------------------------------|-------|
| RAB43/NM_198490        | GO:0000166 | HMMPfam_RAS                  |                                                    | BCM   |
|                        | GO:0003677 |                              |                                                    |       |
|                        | GO:0003924 |                              |                                                    |       |
|                        | GO:0004871 |                              |                                                    |       |
|                        | GO:0004879 |                              |                                                    |       |
|                        | GO:0005515 |                              |                                                    |       |
|                        | GO:0005525 |                              |                                                    |       |
|                        | GO:0005622 |                              |                                                    |       |
|                        | GO:0005634 |                              |                                                    |       |
|                        | GO:0005681 |                              |                                                    |       |
|                        | GO:0006355 |                              |                                                    |       |
|                        | GO:0006397 |                              |                                                    |       |
|                        | GO:0006886 |                              |                                                    |       |
|                        | GO:0006913 |                              |                                                    |       |
|                        | GO:0007165 |                              |                                                    |       |
|                        | GO:0007186 |                              |                                                    |       |
|                        | GO:0007264 |                              |                                                    |       |
|                        | GO:0008380 |                              |                                                    |       |
|                        | GO:0015031 |                              |                                                    |       |
|                        | GO:0016020 |                              |                                                    |       |
|                        | GO:0019001 |                              |                                                    |       |
| RAF1/ENST00000251849   | GO:0007242 | HMMPfam_C1_1                 | superfamily_Cysteine-rich domain                   | SHARE |
|                        | GO:0004672 | HMMPfam_Pkinase              | superfamily_Protein kinase-like (PK-like)          |       |
|                        | GO:0005057 | HMMPfam_RBD                  | superfamily_Ubiquitin-like                         |       |
| RAGE/ENST00000361847   | GO:0004672 | HMMPfam_Pkinase              | superfamily_Protein kinase-like (PK-like)          | BCM   |
| RALA/ENST0000005257    |            | HMMPfam_Ras                  | superfamily_P-loop containing nucleoside triphosph | BCM   |
| RALB/ENST00000376224   |            | HMMPfam_Ras                  | superfamily_P-loop containing nucleoside triphosph | BCM   |
| RAN/OTTHUMT00000263332 |            | HMMPfam_Ras                  | superfamily_P-loop containing nucleoside triphosph | Broad |
| RANBP9/ENST00000011619 |            | HMMPfam_LisH<br>HMMPfam_SPRY |                                                    | WU    |
| RAP1A/ENST00000356415  |            | HMMPfam_Ras                  | superfamily_P-loop containing nucleoside triphosph | WU    |
| RAP1B/ENST00000250559  |            | HMMPfam_Ras                  | superfamily_P-loop containing nucleoside triphosph | Broad |
| RAP2A/ENST00000245304  |            | HMMPfam_Ras                  | superfamily_P-loop containing nucleoside triphosph | BCM   |

|                         |                          |                                                      |                                                                                                                 |       |
|-------------------------|--------------------------|------------------------------------------------------|-----------------------------------------------------------------------------------------------------------------|-------|
| RAP2B/ENST00000323534   |                          | HMMPfam_Ras                                          | superfamily_P-loop containing nucleoside triphosph                                                              | WU    |
| RAP2C/ENST00000342983   |                          | HMMPfam_Ras                                          | superfamily_P-loop containing nucleoside triphosph                                                              | WU    |
| RAPGEF1/ENST00000337036 | GO:0005085               | HMMPfam_RasGEF<br>HMMPfam_RasGEF_N                   | superfamily_Ras GEF                                                                                             | WU    |
| RAPTOR/NM_020761        |                          | HMMPfam_HEAT<br>HMMPfam_WD40                         | superfamily_ARM repeat<br>superfamily_WD40 repeat-like                                                          | WU    |
| RARB/ENST00000383772    | GO:0003700               | HMMPfam_Hormone_recep<br>HMMPfam_zf-C4               | superfamily_Glucocorticoid receptor-like (DNA-bind<br>superfamily_Nuclear receptor ligand-binding domain        | Broad |
| RASEF/ENST00000330861   | GO:0005509               | HMMPfam_Ras<br>HMMPfam_efhand                        | superfamily_EF-hand<br>superfamily_P-loop containing nucleoside triphosph<br>superfamily_alpha-catenin/vinculin | WU    |
| RASSF1/ENST00000357043  | GO:0007242<br>GO:0007165 | HMMPfam_C1_1<br>HMMPfam_RA                           | superfamily_Cysteine-rich domain                                                                                | WU    |
| RASSF2/NM_170774        | GO:0007165               | HMMPfam_RA                                           |                                                                                                                 | BCM   |
| RASSF3/ENST00000336061  | GO:0007165               | HMMPfam_RA                                           |                                                                                                                 | Broad |
| RB1/ENST00000267163     |                          | HMMPfam_RB_A<br>HMMPfam_RB_B<br>HMMPfam_Rb_C         | superfamily_Cyclin-like<br>superfamily_Formin homology 2 domain (FH2 domain)                                    | SHARE |
| RBL1/ENST00000373664    |                          | HMMPfam_RB_A<br>HMMPfam_RB_B                         | superfamily_Cyclin-like                                                                                         | WU    |
| RBL2/ENST00000262133    |                          | HMMPfam_RB_A<br>HMMPfam_RB_B                         | superfamily_Cyclin-like                                                                                         | WU    |
| RBM5/ENST00000347869    | GO:0005622<br>GO:0003676 | HMMPfam_G-patch<br>HMMPfam_RRM_1<br>HMMPfam_zf-RanBP | superfamily_C2H2 and C2HC zinc fingers<br>superfamily_RNA-binding domain RBD                                    | WU    |
| RBM6/ENST00000266022    | GO:0003676               | HMMPfam_G-patch                                      | superfamily_C2H2 and C2HC zinc fingers<br>superfamily_NZF domain<br>superfamily_RNA-binding domain RBD          | Broad |
| RCBTB2/ENST00000344532  |                          | HMMPfam_BTB<br>HMMPfam_RCC1                          | superfamily_POZ domain<br>superfamily_RCC1/BLIP-II                                                              | Broad |
| REEP5/ENST00000379639   |                          | HMMPfam_TB2_DP1_HVA22                                |                                                                                                                 | Broad |
| REL/ENST00000295025     | GO:0003700               | HMMPfam_RHD<br>HMMPfam_TIG                           | superfamily_E set domains<br>superfamily_p53-like transcription factors                                         | BCM   |

|                            |                                                      |                                                                                   |                                                                                                                                      |       |
|----------------------------|------------------------------------------------------|-----------------------------------------------------------------------------------|--------------------------------------------------------------------------------------------------------------------------------------|-------|
| RELA/ENST00000308639       | GO:0003700                                           | HMMPfam_RHD<br>HMMPfam_TIG                                                        | superfamily_E set domains<br>superfamily_p53-like transcription factors                                                              | BCM   |
| RELB/ENST00000221452       | GO:0003700                                           | HMMPfam_RHD<br>HMMPfam_TIG                                                        | superfamily_E set domains<br>superfamily_p53-like transcription factors                                                              | WU    |
| RET/ENST00000340058        | GO:0005509<br>GO:0004713                             | HMMPfam_Cadherin<br>HMMPfam_Pkinase_Tyr                                           | superfamily_Cadherin-like<br>superfamily_Protein kinase-like (PK-like)<br>superfamily_Scorpion toxin-like                            | SHARE |
| RHEB/ENST00000262187       |                                                      | HMMPfam_Ras                                                                       | superfamily_P-loop containing nucleoside triphosph                                                                                   | BCM   |
| RHOA/ENST00000265538       |                                                      | HMMPfam_Ras                                                                       | superfamily_P-loop containing nucleoside triphosph                                                                                   | WU    |
| RHOB/ENST00000381107       |                                                      | HMMPfam_Ras                                                                       | superfamily_P-loop containing nucleoside triphosph                                                                                   | Broad |
| RHOBTB2/OTTHUMT00000273508 |                                                      | HMMPfam_BTBTB<br>HMMPfam_Ras                                                      | superfamily_P-loop containing nucleoside triphosph<br>superfamily_POZ domain                                                         | Broad |
| RHOC/ENST00000369633       |                                                      | HMMPfam_Ras                                                                       | superfamily_P-loop containing nucleoside triphosph                                                                                   | WU    |
| RICTOR/NM_152756           |                                                      |                                                                                   | superfamily_ARM repeat<br>superfamily_Cyclin-like                                                                                    | Broad |
| RIN1/ENST00000311320       | GO:0007165                                           | HMMPfam_RA<br>HMMPfam_VPS9                                                        | superfamily_SH2 domain<br>superfamily_VPS9 domain (Pfam 02204)                                                                       | BCM   |
| RIPK1/ENST00000380409      | GO:0005515<br>GO:0004672                             | HMMPfam_Death<br>HMMPfam_Pkinase                                                  | superfamily_DEATH domain<br>superfamily_Protein kinase-like (PK-like)                                                                | WU    |
| RIPK2/ENST00000220751      | GO:0005515<br>GO:0004672                             | HMMPfam_CARD<br>HMMPfam_Pkinase                                                   | superfamily_DEATH domain<br>superfamily_Protein kinase-like (PK-like)                                                                | WU    |
| RIPK3/ENST00000216274      | GO:0004672                                           | HMMPfam_Pkinase                                                                   | superfamily_Protein kinase-like (PK-like)                                                                                            | WU    |
| RIPK4/ENST00000352483      | GO:0004672                                           | HMMPfam_Ank<br>HMMPfam_Pkinase                                                    | superfamily_Ankyrin repeat<br>superfamily_Protein kinase-like (PK-like)                                                              | WU    |
| ROBO1/OTTHUMT00000265386   |                                                      | HMMPfam_I-set<br>HMMPfam_fn3                                                      | superfamily_Fibronectin type III<br>superfamily_Immunoglobulin                                                                       | Broad |
| ROBO2/ENST00000332191      |                                                      | HMMPfam_I-set<br>HMMPfam_fn3                                                      | superfamily_Fibronectin type III<br>superfamily_Immunoglobulin                                                                       | Broad |
| ROCK1/ENST00000261535      | GO:0005622<br>GO:0007242<br>GO:0004672<br>GO:0004674 | HMMPfam_C1_1<br>HMMPfam_HR1<br>HMMPfam_PH<br>HMMPfam_Pkinase<br>HMMPfam_Pkinase_C | superfamily_Cysteine-rich domain<br>superfamily_PH domain-like<br>superfamily_Prefoldin<br>superfamily_Protein kinase-like (PK-like) | BCM   |



|                         |                                                      | HMMPfam_Rho Binding                                                                                      |                                                                                                                                                  |       |
|-------------------------|------------------------------------------------------|----------------------------------------------------------------------------------------------------------|--------------------------------------------------------------------------------------------------------------------------------------------------|-------|
| ROCK2/ENST00000315872   | GO:0005622<br>GO:0007242<br>GO:0004672<br>GO:0004674 | HMMPfam_C1_1<br>HMMPfam_HR1<br>HMMPfam_PH<br>HMMPfam_Pkinase<br>HMMPfam_Pkinase_C<br>HMMPfam_Rho Binding | superfamily_Cysteine-rich domain<br>superfamily_PH domain-like<br>superfamily_Protein kinase-like (PK-like)<br>superfamily_tRNA-binding arm      | BCM   |
| ROR1/ENST00000371079    | GO:0004713                                           | HMMPfam_Fz<br>HMMPfam_I-set<br>HMMPfam_Kringle<br>HMMPfam_Pkinase Tyr                                    | superfamily_Frizzled cysteine-rich domain<br>superfamily_Immunoglobulin<br>superfamily_Kringle-like<br>superfamily_Protein kinase-like (PK-like) | BCM   |
| ROR2/ENST00000375708    | GO:0004713                                           | HMMPfam_Fz<br>HMMPfam_I-set<br>HMMPfam_Kringle<br>HMMPfam_Pkinase Tyr                                    | superfamily_Frizzled cysteine-rich domain<br>superfamily_Immunoglobulin<br>superfamily_Kringle-like<br>superfamily_Protein kinase-like (PK-like) | BCM   |
| RPS6KA1/ENST00000374162 | GO:0004672<br>GO:0004674                             | HMMPfam_Pkinase<br>HMMPfam_Pkinase_C                                                                     | superfamily_Protein kinase-like (PK-like)                                                                                                        | Broad |
| RPS6KA2/ENST00000366867 | GO:0004672<br>GO:0004674                             | HMMPfam_Pkinase<br>HMMPfam_Pkinase_C                                                                     | superfamily_Protein kinase-like (PK-like)                                                                                                        | Broad |
| RPS6KA3/ENST00000379565 | GO:0004672<br>GO:0004674                             | HMMPfam_Pkinase<br>HMMPfam_Pkinase_C                                                                     | superfamily_Protein kinase-like (PK-like)                                                                                                        | BCM   |
| RPS6KA4/ENST00000334205 | GO:0004672<br>GO:0004674                             | HMMPfam_Pkinase<br>HMMPfam_Pkinase_C                                                                     | superfamily_Protein kinase-like (PK-like)                                                                                                        | BCM   |
| RPS6KA5/ENST00000261991 | GO:0004672<br>GO:0004674                             | HMMPfam_Pkinase<br>HMMPfam_Pkinase_C                                                                     | superfamily_Protein kinase-like (PK-like)                                                                                                        | BCM   |
| RPS6KA6/ENST00000262752 | GO:0004672<br>GO:0004674                             | HMMPfam_Pkinase<br>HMMPfam_Pkinase_C                                                                     | superfamily_Protein kinase-like (PK-like)                                                                                                        | BCM   |
| RPS6KB1/ENST00000225577 | GO:0004672<br>GO:0004674                             | HMMPfam_Pkinase<br>HMMPfam_Pkinase_C                                                                     | superfamily_Protein kinase-like (PK-like)                                                                                                        | Broad |
| RPS6KB2/ENST00000312629 | GO:0004672<br>GO:0004674                             | HMMPfam_Pkinase<br>HMMPfam_Pkinase_C                                                                     | superfamily_Protein kinase-like (PK-like)                                                                                                        | BCM   |
| RPSA/NM_001012321       | GO:0003735                                           | HMMPfam_Ribosomal_S2                                                                                     | superfamily_Ribosomal protein S2                                                                                                                 | WU    |
| RRAS/ENST00000246792    |                                                      | HMMPfam_Ras                                                                                              | superfamily_P-loop containing nucleoside triphosph                                                                                               | WU    |

|                             |                                        |                                                    |                                                                                    |       |
|-----------------------------|----------------------------------------|----------------------------------------------------|------------------------------------------------------------------------------------|-------|
| RRAS2/ENST00000256196       |                                        | HMMPfam_Ras                                        | superfamily_P-loop containing nucleoside triphosph                                 | Broad |
| RUNX1/ENST00000300305       |                                        | HMMPfam_Runt<br>HMMPfam_RunxI                      | superfamily_p53-like transcription factors                                         | WU    |
| RUNX2/ENST00000359524       |                                        | HMMPfam_Runt<br>HMMPfam_RunxI                      | superfamily_p53-like transcription factors                                         | Broad |
| RUNX3/ENST00000338888       |                                        | HMMPfam_Runt<br>HMMPfam_RunxI                      | superfamily_p53-like transcription factors                                         | Broad |
| RYK/ENST00000296084         | GO:0004713                             | HMMPfam_Pkinase_Tyr<br>HMMPfam_WIF                 | superfamily_Protein kinase-like (PK-like)                                          | Broad |
| SCARF2/ENST00000266214      |                                        | HMMPfam_EGF_2<br>HMMPfam_Laminin_EGF               | superfamily_EGF/Laminin<br>superfamily_Growth factor receptor domain               | BCM   |
| SEMA3B/ENST00000316347      | GO:0004872                             | HMMPfam_PSI<br>HMMPfam_Sema<br>HMMPfam_ig          | superfamily_Immunoglobulin<br>superfamily_Plexin repeat<br>superfamily_Sema domain | WU    |
| SEMA3F/ENST00000002829      |                                        | HMMPfam_Sema<br>HMMPfam_ig                         | superfamily_Immunoglobulin<br>superfamily_Plexin repeat<br>superfamily_Sema domain | WU    |
| SERPIND1/OTTHUMT00000075725 | GO:0004867                             | HMMPfam_Serpin                                     | superfamily_Serpins                                                                | BCM   |
| SGK/ENST00000367858         | GO:0004672<br>GO:0004674               | HMMPfam_Pkinase<br>HMMPfam_Pkinase_C               | superfamily_PX domain<br>superfamily_Protein kinase-like (PK-like)                 | WU    |
| SGK2/ENST00000341458        | GO:0004672<br>GO:0004674               | HMMPfam_Pkinase<br>HMMPfam_Pkinase_C               | superfamily_Protein kinase-like (PK-like)                                          | WU    |
| SGKL/ENST00000262211        | GO:0005515<br>GO:0004672<br>GO:0004674 | HMMPfam_PX<br>HMMPfam_Pkinase<br>HMMPfam_Pkinase_C | superfamily_PX domain<br>superfamily_Protein kinase-like (PK-like)                 | BCM   |
| SHC1/ENST00000368447        | GO:0007242                             | HMMPfam_PID<br>HMMPfam_SH2                         | superfamily_PH domain-like<br>superfamily_SH2 domain                               | SHARE |
| SHC2/ENST00000264554        | GO:0007242                             | HMMPfam_PID<br>HMMPfam_SH2                         | superfamily_PH domain-like<br>superfamily_SH2 domain                               | SHARE |
| SHC3/ENST00000375835        | GO:0007242                             | HMMPfam_PID<br>HMMPfam_SH2                         | superfamily_PH domain-like<br>superfamily_SH2 domain                               | SHARE |
| SHH/ENST00000297261         | GO:0007267<br>GO:0006508               | HMMPfam_HH_signal<br>HMMPfam_Hint                  | superfamily_Hedgehog/DD-peptidase<br>superfamily_Hedgehog/intein (Hint) domain     | BCM   |

|                         |            |                                                        |                                                                                                    |       |
|-------------------------|------------|--------------------------------------------------------|----------------------------------------------------------------------------------------------------|-------|
| SIAH1/ENST00000359996   | GO:0005634 | HMMPfam_Sina                                           | superfamily_RING/U-box<br>superfamily_TRAF domain-like                                             | WU    |
| SKI/ENST00000378536     | GO:0005634 | HMMPfam_Ski_Sno<br>HMMPfam_c-<br>SKI_SMAD_bind         | superfamily_Putative DNA-binding domain<br><br>superfamily_SAND domain-like                        | BCM   |
| SLA/OTTHUMT00000275504  | GO:0007242 | HMMPfam_SH2<br>HMMPfam_SH3_1                           | superfamily_SH2 domain<br>superfamily_SH3-domain                                                   | Broad |
| SLC38A3/ENST00000341160 |            | HMMPfam_Aa_trans                                       |                                                                                                    | WU    |
| SLC7A4/ENST00000382932  | GO:0006810 | HMMPfam_AA_permease                                    |                                                                                                    | BCM   |
| SLK/ENST00000369755     | GO:0004672 | HMMPfam_Pkinase                                        | superfamily_Protein kinase-like (PK-like)                                                          | WU    |
| SMAD1/ENST00000302085   | GO:0005622 | HMMPfam_MH1<br>HMMPfam_MH2                             | superfamily_SMAD MH1 domain<br>superfamily_SMAD/FHA domain                                         | WU    |
| SMAD2/ENST00000262160   | GO:0005622 | HMMPfam_MH1<br>HMMPfam_MH2                             | superfamily_SMAD MH1 domain<br>superfamily_SMAD/FHA domain                                         | Broad |
| SMAD3/ENST00000327367   | GO:0005622 | HMMPfam_MH1<br>HMMPfam_MH2                             | superfamily_SMAD MH1 domain<br>superfamily_SMAD/FHA domain                                         | Broad |
| SMAD4/ENST00000342988   | GO:0005622 | HMMPfam_MH1<br>HMMPfam_MH2                             | superfamily_SMAD MH1 domain<br>superfamily_SMAD/FHA domain                                         | Broad |
| SMAD5/ENST00000231589   | GO:0005622 | HMMPfam_MH1<br>HMMPfam_MH2                             | superfamily_SMAD MH1 domain<br>superfamily_SMAD/FHA domain                                         | WU    |
| SMAD6/ENST00000288840   | GO:0005622 | HMMPfam_MH1<br>HMMPfam_MH2                             | superfamily_SMAD MH1 domain<br>superfamily_SMAD/FHA domain                                         | Broad |
| SMAD7/ENST00000262158   | GO:0005622 | HMMPfam_MH1<br>HMMPfam_MH2                             | superfamily_SMAD MH1 domain<br>superfamily_SMAD/FHA domain                                         | Broad |
| SMAD9/ENST00000379826   | GO:0005622 | HMMPfam_MH1<br>HMMPfam_MH2                             | superfamily_SMAD MH1 domain<br>superfamily_SMAD/FHA domain                                         | BCM   |
| SMG1/NM_015092          | GO:0016773 | HMMPfam_FATC<br>HMMPfam_HEAT<br>HMMPfam_PI3_PI4_kinase | superfamily_ARM repeat<br>superfamily_Protein kinase-like (PK-like)<br>superfamily_Spectrin repeat | BCM   |
| SMO/ENST00000249373     | GO:0004926 | HMMPfam_Frizzled<br>HMMPfam_Fz                         | superfamily_Frizzled cysteine-rich domain                                                          | Broad |
| SNAP29/ENST00000215730  |            | HMMPfam_SNAP-25<br>HMMPfam_SNARE                       |                                                                                                    | BCM   |

|                        |                                        |                                                                                       |                                                                                                                                              |       |
|------------------------|----------------------------------------|---------------------------------------------------------------------------------------|----------------------------------------------------------------------------------------------------------------------------------------------|-------|
| SOS1/ENST00000263879   | GO:0003677<br>GO:0005089<br>GO:0005085 | HMMPfam_Histone<br>HMMPfam_PH<br>HMMPfam_RasGEF<br>HMMPfam_RasGEF_N<br>HMMPfam_RhoGEF | superfamily_DBL homology domain (DH-domain)<br>superfamily_Histone-fold<br>superfamily_PH domain-like<br>superfamily_Ras GEF                 | WU    |
| SOS2/ENST00000216373   | GO:0003677<br>GO:0005089<br>GO:0005085 | HMMPfam_Histone<br>HMMPfam_PH<br>HMMPfam_RasGEF<br>HMMPfam_RasGEF_N<br>HMMPfam_RhoGEF | superfamily_DBL homology domain (DH-domain)<br>superfamily_Histone-fold<br>superfamily_PH domain-like<br>superfamily_Ras GEF                 | Broad |
| SRC/ENST00000373558    | GO:0007242<br>GO:0004713               | HMMPfam_Pkinase_Tyr<br>HMMPfam_SH2<br>HMMPfam_SH3_1                                   | superfamily_Protein kinase-like (PK-like)<br>superfamily_SH2 domain<br>superfamily_SH3-domain                                                | SHARE |
| SRMS/ENST00000217188   | GO:0007242<br>GO:0004713               | HMMPfam_Pkinase_Tyr<br>HMMPfam_SH2<br>HMMPfam_SH3_2                                   | superfamily_Protein kinase-like (PK-like)<br>superfamily_SH2 domain<br>superfamily_SH3-domain                                                | SHARE |
| STAT1/ENST00000361099  | GO:0007242<br>GO:0003700               | HMMPfam_SH2<br>HMMPfam_STAT_alpha<br>HMMPfam_STAT_bind<br>HMMPfam_STAT_int            | superfamily_SH2 domain<br>superfamily_STAT<br>superfamily_Transcription factor STAT-4 N-domain<br>superfamily_p53-like transcription factors | BCM   |
| STAT2/ENST00000314128  | GO:0007242<br>GO:0003700               | HMMPfam_SH2<br>HMMPfam_STAT_alpha<br>HMMPfam_STAT_bind<br>HMMPfam_STAT_int            | superfamily_SH2 domain<br>superfamily_STAT<br>superfamily_Transcription factor STAT-4 N-domain<br>superfamily_p53-like transcription factors | BCM   |
| STAT3/ENST00000264657  | GO:0007242<br>GO:0003700               | HMMPfam_SH2<br>HMMPfam_STAT_alpha<br>HMMPfam_STAT_bind<br>HMMPfam_STAT_int            | superfamily_SH2 domain<br>superfamily_STAT<br>superfamily_Transcription factor STAT-4 N-domain<br>superfamily_p53-like transcription factors | BCM   |
| STAT4/ENST00000358470  | GO:0007242<br>GO:0003700               | HMMPfam_SH2<br>HMMPfam_STAT_alpha<br>HMMPfam_STAT_bind<br>HMMPfam_STAT_int            | superfamily_SH2 domain<br>superfamily_STAT<br>superfamily_Transcription factor STAT-4 N-domain<br>superfamily_p53-like transcription factors | BCM   |
| STAT5A/ENST00000345506 | GO:0007242                             | HMMPfam_SH2                                                                           | superfamily_SH2 domain                                                                                                                       | BCM   |

|                          |                          |                                                                            |                                                                                                                                              |       |
|--------------------------|--------------------------|----------------------------------------------------------------------------|----------------------------------------------------------------------------------------------------------------------------------------------|-------|
|                          | GO:0003700               | HMMPfam_STAT_alpha<br>HMMPfam_STAT_bind<br>HMMPfam_STAT_int                | superfamily_STAT<br>superfamily_Transcription factor STAT-4 N-domain<br>superfamily_p53-like transcription factors                           |       |
| STAT5B/ENST00000293328   | GO:0007242<br>GO:0003700 | HMMPfam_SH2<br>HMMPfam_STAT_alpha<br>HMMPfam_STAT_bind<br>HMMPfam_STAT_int | superfamily_SH2 domain<br>superfamily_STAT<br>superfamily_Transcription factor STAT-4 N-domain<br>superfamily_p53-like transcription factors | BCM   |
| STAT6/ENST00000300134    | GO:0007242<br>GO:0003700 | HMMPfam_SH2<br>HMMPfam_STAT_alpha<br>HMMPfam_STAT_bind<br>HMMPfam_STAT_int | superfamily_SH2 domain<br>superfamily_STAT<br>superfamily_Transcription factor STAT-4 N-domain<br>superfamily_p53-like transcription factors | Broad |
| STK10/ENST00000389883    | GO:0004672               | HMMPfam_Pkinase                                                            | superfamily_Protein kinase-like (PK-like)                                                                                                    | Broad |
| STK11/ENST00000326873    | GO:0004672               | HMMPfam_Pkinase                                                            | superfamily_Protein kinase-like (PK-like)                                                                                                    | SHARE |
| STK23/OTTHUMT00000060999 | GO:0004672               | HMMPfam_Pkinase                                                            | superfamily_Protein kinase-like (PK-like)                                                                                                    | BCM   |
| STK24/ENST00000376547    | GO:0004672               | HMMPfam_Pkinase                                                            | superfamily_Protein kinase-like (PK-like)                                                                                                    | BCM   |
| STK25/ENST00000316586    | GO:0004672               | HMMPfam_Pkinase                                                            | superfamily_Protein kinase-like (PK-like)                                                                                                    | BCM   |
| STK3/ENST00000354930     | GO:0004672               | HMMPfam_Pkinase                                                            | superfamily_Protein kinase-like (PK-like)                                                                                                    | WU    |
| STK32A/ENST00000306304   | GO:0004672               | HMMPfam_Pkinase                                                            | superfamily_Protein kinase-like (PK-like)                                                                                                    | BCM   |
| STK32B/ENST00000282908   | GO:0004672               | HMMPfam_Pkinase                                                            | superfamily_Protein kinase-like (PK-like)                                                                                                    | Broad |
| STK32C/ENST00000298630   | GO:0004672               | HMMPfam_Pkinase                                                            | superfamily_Protein kinase-like (PK-like)                                                                                                    | BCM   |
| STK36/ENST00000295709    | GO:0004672               | HMMPfam_HEAT<br>HMMPfam_Pkinase                                            | superfamily_ARM repeat<br>superfamily_Protein kinase-like (PK-like)                                                                          | WU    |
| STK38/ENST00000229812    | GO:0004672<br>GO:0004674 | HMMPfam_Pkinase<br>HMMPfam_Pkinase_C                                       | superfamily_Protein kinase-like (PK-like)                                                                                                    | BCM   |
| STK38L/ENST00000389032   | GO:0004672<br>GO:0004674 | HMMPfam_Pkinase<br>HMMPfam_Pkinase_C                                       | superfamily_Protein kinase-like (PK-like)                                                                                                    | WU    |
| STK39/ENST00000355999    | GO:0004672               | HMMPfam_Pkinase                                                            | superfamily_Protein kinase-like (PK-like)                                                                                                    | WU    |
| STK6/ENST00000347343     | GO:0004672               | HMMPfam_Pkinase                                                            | superfamily_Protein kinase-like (PK-like)                                                                                                    | WU    |
| STYK1/ENST00000075503    | GO:0004713               | HMMPfam_Pkinase_Tyr                                                        | superfamily_Protein kinase-like (PK-like)                                                                                                    | Broad |
| SUCNR1/ENST00000362032   | GO:0001584               | HMMPfam_7tm_1                                                              | superfamily_Family A G protein-coupled receptor-li                                                                                           | WU    |
| SUFU/ENST00000369902     |                          | HMMPfam_SUFU                                                               | superfamily_Suppressor of Fused N-terminal domain                                                                                            | Broad |

|                        |                          |                                                                                  |                                                                                                                                        |       |
|------------------------|--------------------------|----------------------------------------------------------------------------------|----------------------------------------------------------------------------------------------------------------------------------------|-------|
| SYK/ENST00000375754    | GO:0007242<br>GO:0004713 | HMMPfam_Pkinase_Tyr<br>HMMPfam_SH2                                               | superfamily_Protein kinase-like (PK-like)<br>superfamily_SH2 domain                                                                    | BCM   |
| TAOK1/ENST00000261716  | GO:0004672               | HMMPfam_Pkinase                                                                  | superfamily_Protein kinase-like (PK-like)<br>superfamily_Ribbon-helix-helix                                                            | Broad |
| TAOK2/ENST00000308893  | GO:0004672               | HMMPfam_Pkinase                                                                  | superfamily_Protein kinase-like (PK-like)                                                                                              | Broad |
| TAOK3/ENST00000359166  | GO:0004672               | HMMPfam_Pkinase                                                                  | superfamily_Protein kinase-like (PK-like)<br>superfamily_Ribbon-helix-helix                                                            | Broad |
| TBK1/ENST00000331710   | GO:0004672               | HMMPfam_Pkinase                                                                  | superfamily_Protein kinase-like (PK-like)<br>superfamily_Ubiquitin-like                                                                | Broad |
| TCF1/ENST00000257555   | GO:0005634<br>GO:0003700 | HMMPfam_HNF-1A_C<br>HMMPfam_HNF-1B_C<br>HMMPfam_HNF-1_N<br>HMMPfam_Homeobox      | superfamily_Dimerization cofactor of HNF-1 alpha<br>superfamily_Homeodomain-like<br>superfamily_lambda repressor-like DNA-binding doma | Broad |
| TEC/ENST00000381501    | GO:0007242<br>GO:0004713 | HMMPfam_BTK<br>HMMPfam_PH<br>HMMPfam_Pkinase_Tyr<br>HMMPfam_SH2<br>HMMPfam_SH3_1 | superfamily_PH domain-like<br>superfamily_Protein kinase-like (PK-like)<br>superfamily_SH2 domain<br>superfamily_SH3-domain            | BCM   |
| TEK/ENST00000380040    | GO:0004713               | HMMPfam_EGF_2<br>HMMPfam_Pkinase_Tyr<br>HMMPfam_fn3                              | superfamily_EGF/Laminin<br>superfamily_Fibronectin type III<br>superfamily_Immunoglobulin<br>superfamily_Protein kinase-like (PK-like) | BCM   |
| TERT/ENST00000310581   |                          |                                                                                  | superfamily_DNA/RNA polymerases                                                                                                        | SHARE |
| TESK1/ENST00000336395  | GO:0004672               | HMMPfam_Pkinase                                                                  | superfamily_Protein kinase-like (PK-like)                                                                                              | BCM   |
| TESK2/ENST00000372086  | GO:0004672               | HMMPfam_Pkinase                                                                  | superfamily_Protein kinase-like (PK-like)                                                                                              | WU    |
| TFDP1/ENST00000375370  | GO:0000074               | HMMPfam_DP<br>HMMPfam_E2F_TDP                                                    |                                                                                                                                        | Broad |
| TGFB2/ENST00000366929  | GO:0008083               | HMMPfam_TGF_beta<br>HMMPfam_TGFb_propeptide                                      | superfamily_Cystine-knot cytokines                                                                                                     | Broad |
| TGFBR1/ENST00000374994 | GO:0004672<br>GO:0004675 | HMMPfam_Activin_recp<br>HMMPfam_Pkinase<br>HMMPfam_TGF_beta_GS                   | superfamily_Protein kinase-like (PK-like)<br>superfamily_Snake toxin-like                                                              | BCM   |
| TGFBR2/ENST00000359013 | GO:0004672               | HMMPfam_Pkinase                                                                  | superfamily_Protein kinase-like (PK-like)                                                                                              | Broad |

|                         |                          |                                                                                  |                                                                                                                                                                 |       |
|-------------------------|--------------------------|----------------------------------------------------------------------------------|-----------------------------------------------------------------------------------------------------------------------------------------------------------------|-------|
|                         |                          | HMMPfam_ecTbetaR2                                                                | superfamily_Snake toxin-like                                                                                                                                    |       |
| THAP7/ENST00000215742   | GO:0003676               | HMMPfam_THAP                                                                     |                                                                                                                                                                 | BCM   |
| TIE1/ENST00000372476    | GO:0004713               | HMMPfam_EGF<br>HMMPfam_EGF_2<br>HMMPfam_Pkinase_Tyr<br>HMMPfam_fn3<br>HMMPfam_ig | superfamily_EGF/Laminin<br>superfamily_Fibronectin type III<br>superfamily_Immunoglobulin<br>superfamily_Protein kinase-like (PK-like)                          | WU    |
| TMEM115/ENST00000266025 |                          | HMMPfam_DUF1751                                                                  |                                                                                                                                                                 | WU    |
| TNIK/ENST00000284483    | GO:0004672<br>GO:0005083 | HMMPfam_CNH<br>HMMPfam_Pkinase                                                   | superfamily_Protein kinase-like (PK-like)<br>superfamily_YVTN repeat-like/Quinoprotein amine de                                                                 | BCM   |
| TNK1/ENST00000311668    | GO:0004713               | HMMPfam_Pkinase_Tyr                                                              | superfamily_Protein kinase-like (PK-like)<br>superfamily_SAM/Pointed domain<br>superfamily_SH3-domain                                                           | Broad |
| TNK2/ENST00000381916    | GO:0004713               | HMMPfam_GTPase_binding<br>HMMPfam_Pkinase_Tyr<br>HMMPfam_SH3_1                   | superfamily_Protein kinase-like (PK-like)<br>superfamily_SAM/Pointed domain<br>superfamily_SH3-domain                                                           | Broad |
| TNNI3K/NM_015978        | GO:0004713               | HMMPfam_Ank<br>HMMPfam_Pkinase_Tyr                                               | superfamily_Ankyrin repeat<br>superfamily_Protein kinase-like (PK-like)                                                                                         | BCM   |
| TP53/ENST00000269305    | GO:0003677               | HMMPfam_P53<br>HMMPfam_P53_TAD<br>HMMPfam_P53_tetramer                           | superfamily_p53 tetramerization domain<br>superfamily_p53-like transcription factors                                                                            | SHARE |
| TP73/ENST00000378295    | GO:0003677               | HMMPfam_P53<br>HMMPfam_P53_tetramer<br>HMMPfam_SAM_2                             | superfamily_Glycosyl hydrolase domain<br>superfamily_SAM/Pointed domain<br>superfamily_p53 tetramerization domain<br>superfamily_p53-like transcription factors | BCM   |
| TP73L/ENST00000264731   | GO:0003677               | HMMPfam_P53<br>HMMPfam_P53_tetramer<br>HMMPfam_SAM_2                             | superfamily_SAM/Pointed domain<br>superfamily_p53 tetramerization domain<br>superfamily_p53-like transcription factors                                          | BCM   |
| TPTE/ENST00000359693    |                          |                                                                                  | superfamily_(Phosphotyrosine protein) phosphatases<br>superfamily_C2 domain (Calcium/lipid-binding domai<br>superfamily_Voltage-gated potassium channels        | BCM   |
| TRIP/ENST00000331456    | GO:0005515               | HMMPfam_zf-C3HC4                                                                 | superfamily_Prefoldin<br>superfamily_RING/U-box                                                                                                                 | WU    |

|                        |                                                                    |                                                                                            |                                                                                                                                                                                                                     |       |
|------------------------|--------------------------------------------------------------------|--------------------------------------------------------------------------------------------|---------------------------------------------------------------------------------------------------------------------------------------------------------------------------------------------------------------------|-------|
| TSC1/ENST00000298552   |                                                                    | HMMPfam_Hamartin                                                                           | superfamily_ARM repeat                                                                                                                                                                                              | WU    |
| TSC2/ENST00000219476   | GO:0005096                                                         | HMMPfam_Rap_GAP<br>HMMPfam_Tuberin                                                         | superfamily_ARM repeat<br>superfamily_Rap/Ran-GAP (Pfam 02145)                                                                                                                                                      | WU    |
| TSHR/ENST00000298171   | GO:0005515<br>GO:0001584                                           | HMMPfam_7tm_1<br>HMMPfam_LRR_1                                                             | superfamily_Family A G protein-coupled receptor-li<br>superfamily_L domain-like                                                                                                                                     | Broad |
| TU3A/ENST00000360997   |                                                                    | HMMPfam_DUF1151                                                                            |                                                                                                                                                                                                                     | BCM   |
| TUSC2/ENST00000232496  | GO:0007049<br>GO:0008283<br>GO:0007267<br>GO:0045786<br>GO:0005515 |                                                                                            |                                                                                                                                                                                                                     | WU    |
| TUSC4/ENST00000232501  |                                                                    | HMMPfam_NPR2                                                                               |                                                                                                                                                                                                                     | WU    |
| TXK/ENST00000381515    | GO:0007242<br>GO:0004713                                           | HMMPfam_Pkinase_Tyr<br>HMMPfam_SH2<br>HMMPfam_SH3_1                                        | superfamily_Protein kinase-like (PK-like)<br>superfamily_SH2 domain<br>superfamily_SH3-domain                                                                                                                       | BCM   |
| TYK2/ENST00000264818   | GO:0004713                                                         | HMMPfam_Pkinase_Tyr                                                                        | superfamily_Protein kinase-like (PK-like)<br>superfamily_SH2 domain                                                                                                                                                 | BCM   |
| TYRO3/ENST00000263798  | GO:0004713                                                         | HMMPfam_Pkinase_Tyr<br>HMMPfam_fn3<br>HMMPfam_ig                                           | superfamily_Fibronectin type III<br>superfamily_Immunoglobulin<br>superfamily_Protein kinase-like (PK-like)                                                                                                         | WU    |
| UBE2L3/ENST00000342192 | GO:0006464                                                         | HMMPfam_UQ_con                                                                             | superfamily_UBC-like                                                                                                                                                                                                | BCM   |
| VAV1/ENST00000304076   | GO:0005089<br>GO:0007242                                           | HMMPfam_C1_1<br>HMMPfam_CH<br>HMMPfam_PH<br>HMMPfam_RhoGEF<br>HMMPfam_SH2<br>HMMPfam_SH3_1 | superfamily_Calponin-homology domain CH-domain<br>superfamily_Cysteine-rich domain<br>superfamily_DBL homology domain (DH-domain)<br>superfamily_PH domain-like<br>superfamily_SH2 domain<br>superfamily_SH3-domain | BCM   |
| VAV2/ENST00000371850   | GO:0005089<br>GO:0007242                                           | HMMPfam_C1_1<br>HMMPfam_CH<br>HMMPfam_PH<br>HMMPfam_RhoGEF<br>HMMPfam_SH2<br>HMMPfam_SH3_1 | superfamily_Calponin-homology domain CH-domain<br>superfamily_Cysteine-rich domain<br>superfamily_DBL homology domain (DH-domain)<br>superfamily_PH domain-like<br>superfamily_SH2 domain<br>superfamily_SH3-domain | WU    |



|                         |                          |                                                                                                             |                                                                                                                                                                                                                     |       |
|-------------------------|--------------------------|-------------------------------------------------------------------------------------------------------------|---------------------------------------------------------------------------------------------------------------------------------------------------------------------------------------------------------------------|-------|
|                         |                          | HMMPfam_SH3_2                                                                                               |                                                                                                                                                                                                                     |       |
| VAV3/ENST00000370056    | GO:0005089<br>GO:0007242 | HMMPfam_C1_1<br>HMMPfam_CH<br>HMMPfam_PH<br>HMMPfam_RhoGEF<br>HMMPfam_SH2<br>HMMPfam_SH3_1<br>HMMPfam_SH3_2 | superfamily_Calponin-homology domain CH-domain<br>superfamily_Cysteine-rich domain<br>superfamily_DBL homology domain (DH-domain)<br>superfamily_PH domain-like<br>superfamily_SH2 domain<br>superfamily_SH3-domain | WU    |
| VEGFC/ENST00000280193   | GO:0008083               | HMMPfam_CXCXC<br>HMMPfam_PDGF                                                                               | superfamily_Cystine-knot cytokines                                                                                                                                                                                  | Broad |
| VHL/ENST00000256474     | GO:0005634               | HMMPfam_VHL                                                                                                 | superfamily_VHL                                                                                                                                                                                                     | SHARE |
| WEE1/ENST00000299613    | GO:0004672               | HMMPfam_Pkinase                                                                                             | superfamily_Protein kinase-like (PK-like)                                                                                                                                                                           | BCM   |
| WT1/ENST00000332351     | GO:0003676<br>GO:0003700 | HMMPfam_WT1<br>HMMPfam_zf-C2H2                                                                              | superfamily_C2H2 and C2HC zinc fingers                                                                                                                                                                              | WU    |
| XRCC1/ENST00000262887   | GO:0005622<br>GO:0000012 | HMMPfam_BRCT<br>HMMPfam_XRCC1_N                                                                             | superfamily_BRCT domain<br>superfamily_Galactose-binding domain-like                                                                                                                                                | WU    |
| YES1/ENST00000314574    | GO:0007242<br>GO:0004713 | HMMPfam_Pkinase_Tyr<br>HMMPfam_SH2<br>HMMPfam_SH3_1                                                         | superfamily_Protein kinase-like (PK-like)<br>superfamily_SH2 domain<br>superfamily_SH3-domain                                                                                                                       | SHARE |
| ZAK/NM_016653           | GO:0004713               | HMMPfam_Pkinase_Tyr<br>HMMPfam_SAM_2                                                                        | superfamily_Protein kinase-like (PK-like)<br>superfamily_SAM/Pointed domain                                                                                                                                         | WU    |
| ZAP70/ENST00000389517   | GO:0007242<br>GO:0004713 | HMMPfam_Pkinase_Tyr<br>HMMPfam_SH2                                                                          | superfamily_Protein kinase-like (PK-like)<br>superfamily_SH2 domain                                                                                                                                                 | WU    |
| ZMYND10/ENST00000231749 | GO:0008270               | HMMPfam_zf-MYND                                                                                             |                                                                                                                                                                                                                     | WU    |
| ZNF312/ENST00000283268  | GO:0003676               | HMMPfam_zf-C2H2                                                                                             | superfamily_C2H2 and C2HC zinc fingers                                                                                                                                                                              | BCM   |

Supplementary Table 2. Annotation of somatic mutations found in 188 lung adenocarcinomas. Excel spreadsheet can be assessed at [http://genome.wustl.edu/supplemental/tsp\\_nature\\_2008](http://genome.wustl.edu/supplemental/tsp_nature_2008).

Supplementary Table 3a. Top genes with higher frequencies of nonsense, splice site, and frame-shift mutations in 188 lung adenocarcinomas according to Fisher's exact test .

| Gene     | Num. of Missense/In_Frame_Indels | Num. of Nonsense/Nonstop/Splice_site/Frame_Shift_Indels | P_value  | FDR      | Bonferroni |
|----------|----------------------------------|---------------------------------------------------------|----------|----------|------------|
| STK11    | 9                                | 25                                                      | 6.49E-12 | 2.31E-09 | 2.31E-09   |
| RB1      | 0                                | 7                                                       | 6.63E-06 | 0.001181 | 0.002362   |
| NF1      | 6                                | 10                                                      | 0.000112 | 0.013331 | 0.039992   |
| TP53     | 43                               | 23                                                      | 0.001166 | 0.103745 | 0.414979   |
| APC      | 6                                | 7                                                       | 0.003985 | 0.283723 | 1          |
| ACVR1B   | 0                                | 2                                                       | 0.032425 | 1        | 1          |
| BAP1     | 0                                | 2                                                       | 0.032425 | 1        | 1          |
| PIK3R2   | 0                                | 2                                                       | 0.032425 | 1        | 1          |
| LTK      | 3                                | 3                                                       | 0.076083 | 1        | 1          |
| FYN      | 1                                | 2                                                       | 0.085518 | 1        | 1          |
| IRAK2    | 1                                | 2                                                       | 0.085518 | 1        | 1          |
| NOTCH4   | 1                                | 2                                                       | 0.085518 | 1        | 1          |
| PRKDC    | 4                                | 3                                                       | 0.115594 | 1        | 1          |
| ERBB2    | 2                                | 2                                                       | 0.150735 | 1        | 1          |
| ABL2     | 0                                | 1                                                       | 0.179664 | 1        | 1          |
| ARAF     | 0                                | 1                                                       | 0.179664 | 1        | 1          |
| BAX      | 0                                | 1                                                       | 0.179664 | 1        | 1          |
| CACNA2D2 | 0                                | 1                                                       | 0.179664 | 1        | 1          |
| EPHA2    | 0                                | 1                                                       | 0.179664 | 1        | 1          |
| EVI1     | 0                                | 1                                                       | 0.179664 | 1        | 1          |
| HD       | 0                                | 1                                                       | 0.179664 | 1        | 1          |
| IKBKB    | 0                                | 1                                                       | 0.179664 | 1        | 1          |
| JAG1     | 0                                | 1                                                       | 0.179664 | 1        | 1          |
| MAP2K6   | 0                                | 1                                                       | 0.179664 | 1        | 1          |
| MAPK8    | 0                                | 1                                                       | 0.179664 | 1        | 1          |
| MST1R    | 0                                | 1                                                       | 0.179664 | 1        | 1          |
| MUSK     | 0                                | 1                                                       | 0.179664 | 1        | 1          |
| PIM2     | 0                                | 1                                                       | 0.179664 | 1        | 1          |
| PRKAR1A  | 0                                | 1                                                       | 0.179664 | 1        | 1          |

|         |   |   |          |   |   |
|---------|---|---|----------|---|---|
| RAB43   | 0 | 1 | 0.179664 | 1 | 1 |
| RANBP9  | 0 | 1 | 0.179664 | 1 | 1 |
| RIPK1   | 0 | 1 | 0.179664 | 1 | 1 |
| RPS6KA4 | 0 | 1 | 0.179664 | 1 | 1 |
| SRC     | 0 | 1 | 0.179664 | 1 | 1 |
| TGFBR1  | 0 | 1 | 0.179664 | 1 | 1 |

Total number of Missense/In\_Frame\_Indels in all genes tested: 831

Total number of Nonsense/Splice\_site/Frame\_Shift\_Indels in all genes tested: 182

Supplementary Table 3b. Recurrent somatic mutations at 28 sites across seven genes.

| Gene  | # of samples with mutation | Chromosome | Start position | End position | Amino acid change | Variant type    |
|-------|----------------------------|------------|----------------|--------------|-------------------|-----------------|
| KRAS  | 27                         | 12         | 25289552       | 25289552     | p.G12C,R,S        | Missense        |
| KRAS  | 21                         | 12         | 25289551       | 25289551     | p.G12A,D,V        | Missense        |
| EGFR  | 11                         | 7          | 55227009       | 55227009     | p.L858R           | Missense        |
| KRAS  | 7                          | 12         | 25289549       | 25289549     | p.G13C            | Missense        |
| TP53  | 4                          | 17         | 7517867        | 7517867      | p.G266*           | Nonsense        |
| EGFR  | 4                          | 7          | 55209960       | 55209974     | p.E746_A750del    | In Frame Del    |
| TP53  | 3                          | 17         | 7517845        | 7517845      | p.R273L           | Missense        |
| TP53  | 3                          | 17         | 7517819        | 7517819      | p.R282W           | Missense        |
| STK11 | 3                          | 19         | 1158092        | 1158092      | p.Y60fs           | Frame Shift Del |
| NRAS  | 3                          | 1          | 1.15E+08       | 1.15E+08     | p.Q61L            | Missense        |
| KRAS  | 3                          | 12         | 25289551       | 25289552     | p.G12F            | Missense        |
| EGFR  | 3                          | 7          | 55209959       | 55209973     | p.E746            | A750del         |
| TP53  | 2                          | 17         | 7519192        | 7519192      | p.T155P           | Missense        |
| TP53  | 2                          | 17         | 7519186        | 7519186      | p.V157F           | Missense        |
| TP53  | 2                          | 17         | 7519174        | 7519174      | p.A161T           | Missense        |
| TP53  | 2                          | 17         | 7519167        | 7519167      | p.Y163C           | Missense        |

---

|       |   |    |          |          |             |              |
|-------|---|----|----------|----------|-------------|--------------|
| TP53  | 2 | 17 | 7518901  | 7518901  | e5+1        | Splice Site  |
| TP53  | 2 | 17 | 7518273  | 7518273  | p.G245C     | Missense     |
| TP53  | 2 | 17 | 7517839  | 7517839  | p.C275S     | Missense     |
| STK11 | 2 | 19 | 1173005  | 1173006  | c.920_e7+1  | Splice Site  |
| STK11 | 2 | 19 | 1158021  | 1158021  | p.Q37*      | Nonsense     |
| PAK7  | 2 | 20 | 9494832  | 9494832  | p.T397K     | Missense     |
| KRAS  | 2 | 12 | 25289548 | 25289548 | p.G13D      | Missense     |
| FLT4  | 2 | 5  | 1.8E+08  | 1.8E+08  | p.Y1333H    | Missense     |
| EGFR  | 2 | 7  | 55227018 | 55227018 | p.L861Q     | Missense     |
| EGFR  | 2 | 7  | 55226933 | 55226933 | p.L833V     | Missense     |
| EGFR  | 2 | 7  | 55216507 | 55216508 | p.771insSVD | In Frame Ins |
| EGFR  | 2 | 7  | 55216506 | 55216507 | p.771insGL  | In Frame Ins |

---

Supplementary Table 4a. Signature analysis of all 12 possible changes of the transcribed strand in various 5' (before colon) and 3' (after colon) sequence contexts for nonsynonymous mutations found in 623 TSP genes in lung adenocarcinomas.

|     | A:A | A:C | A:G | A:T | C:A | C:C | C:G | C:T | G:A | G:C | G:G | G:T | T:A | T:C | T:G | T:T |
|-----|-----|-----|-----|-----|-----|-----|-----|-----|-----|-----|-----|-----|-----|-----|-----|-----|
| A>C | 0   | 1   | 0   | 1   | 1   | 2   | 1   | 1   | 0   | 0   | 1   | 0   | 0   | 0   | 0   | 1   |
| A>G | 0   | 1   | 1   | 3   | 1   | 3   | 5   | 8   | 0   | 0   | 0   | 2   | 0   | 5   | 1   | 5   |
| A>T | 3   | 3   | 0   | 1   | 8   | 2   | 17  | 7   | 3   | 3   | 3   | 4   | 1   | 0   | 1   | 0   |
| C>A | 3   | 8   | 8   | 3   | 2   | 9   | 4   | 2   | 5   | 7   | 5   | 11  | 3   | 6   | 2   | 5   |
| C>G | 5   | 0   | 3   | 1   | 2   | 2   | 5   | 6   | 1   | 2   | 3   | 1   | 8   | 6   | 1   | 9   |
| C>T | 3   | 5   | 6   | 1   | 11  | 13  | 17  | 3   | 4   | 8   | 6   | 0   | 14  | 8   | 5   | 7   |
| G>A | 8   | 4   | 9   | 4   | 10  | 7   | 10  | 6   | 12  | 12  | 7   | 14  | 9   | 1   | 6   | 15  |
| G>C | 9   | 3   | 3   | 1   | 8   | 3   | 4   | 2   | 6   | 5   | 3   | 8   | 6   | 2   | 4   | 4   |
| G>T | 24  | 14  | 18  | 13  | 15  | 20  | 19  | 15  | 24  | 14  | 27  | 20  | 6   | 14  | 43  | 8   |
| T>A | 0   | 0   | 5   | 3   | 2   | 0   | 4   | 0   | 2   | 0   | 5   | 0   | 0   | 1   | 0   | 0   |
| T>C | 0   | 0   | 1   | 2   | 1   | 1   | 6   | 2   | 4   | 0   | 1   | 0   | 2   | 1   | 1   | 0   |
| T>G | 0   | 0   | 2   | 0   | 0   | 0   | 12  | 2   | 1   | 0   | 1   | 1   | 0   | 2   | 1   | 1   |

Supplementary Table 4b. Signature analysis of all 12 possible changes of the transcribed strand in various 5' (before colon) and 3' (after colon) sequence contexts for synonymous mutations in 250 genes in lung adenocarcinomas.

|     | A:A | A:C | A:G | A:T | C:A | C:C | C:G | C:T | G:A | G:C | G:G | G:T | T:A | T:C | T:G | T:T |
|-----|-----|-----|-----|-----|-----|-----|-----|-----|-----|-----|-----|-----|-----|-----|-----|-----|
| A>C | 0   | 0   | 0   | 0   | 0   | 0   | 0   | 0   | 0   | 0   | 0   | 0   | 0   | 0   | 0   | 0   |
| A>G | 0   | 0   | 0   | 0   | 0   | 1   | 1   | 0   | 0   | 1   | 0   | 0   | 0   | 0   | 1   | 1   |
| A>T | 0   | 0   | 0   | 0   | 1   | 0   | 1   | 0   | 0   | 0   | 0   | 0   | 0   | 0   | 0   | 0   |
| C>A | 0   | 0   | 1   | 0   | 3   | 2   | 2   | 2   | 0   | 0   | 0   | 0   | 0   | 2   | 1   | 0   |
| C>G | 0   | 0   | 0   | 0   | 0   | 0   | 0   | 1   | 0   | 0   | 0   | 0   | 0   | 0   | 0   | 1   |
| C>T | 4   | 3   | 2   | 0   | 2   | 4   | 2   | 2   | 0   | 2   | 4   | 1   | 5   | 3   | 3   | 1   |
| G>A | 1   | 0   | 6   | 3   | 4   | 0   | 1   | 0   | 0   | 1   | 3   | 0   | 2   | 2   | 4   | 1   |
| G>C | 0   | 0   | 0   | 0   | 0   | 1   | 0   | 0   | 0   | 0   | 0   | 0   | 0   | 0   | 1   | 0   |
| G>T | 0   | 0   | 0   | 0   | 0   | 1   | 4   | 0   | 1   | 2   | 1   | 0   | 2   | 3   | 0   | 1   |
| T>A | 0   | 0   | 0   | 0   | 1   | 0   | 0   | 0   | 0   | 0   | 0   | 0   | 0   | 0   | 0   | 0   |
| T>C | 1   | 0   | 0   | 0   | 0   | 0   | 0   | 0   | 0   | 0   | 0   | 1   | 0   | 0   | 0   | 0   |
| T>G | 0   | 0   | 0   | 0   | 0   | 0   | 0   | 0   | 0   | 0   | 0   | 0   | 0   | 0   | 0   | 0   |

Supplementary Table 4c. Signature analysis of all 12 possible changes of the transcribed strand in various 5' (before colon) and 3' (after colon) sequence contexts for 108 synonymous mutations and 156 non-synonymous point mutations from genes with only one mutation.

|     | A:A | A:C | A:G | A:T | C:A | C:C | C:G | C:T | G:A | G:C | G:G | G:T | T:A | T:C | T:G | T:T |
|-----|-----|-----|-----|-----|-----|-----|-----|-----|-----|-----|-----|-----|-----|-----|-----|-----|
| A>C | 0   | 0   | 0   | 0   | 0   | 0   | 0   | 0   | 0   | 0   | 1   | 0   | 0   | 0   | 0   | 1   |
| A>G | 0   | 0   | 1   | 2   | 0   | 3   | 2   | 2   | 0   | 1   | 0   | 1   | 0   | 1   | 1   | 3   |
| A>T | 1   | 2   | 0   | 0   | 2   | 0   | 4   | 3   | 0   | 1   | 0   | 0   | 0   | 0   | 0   | 0   |
| C>A | 0   | 1   | 2   | 0   | 3   | 3   | 3   | 3   | 1   | 0   | 0   | 0   | 0   | 4   | 2   | 1   |
| C>G | 0   | 0   | 0   | 0   | 0   | 0   | 0   | 1   | 0   | 0   | 1   | 0   | 2   | 2   | 0   | 3   |
| C>T | 5   | 4   | 3   | 1   | 4   | 8   | 5   | 2   | 0   | 4   | 6   | 1   | 8   | 3   | 5   | 4   |
| G>A | 3   | 0   | 8   | 3   | 9   | 0   | 3   | 1   | 6   | 2   | 3   | 0   | 5   | 3   | 5   | 5   |
| G>C | 1   | 1   | 1   | 0   | 2   | 2   | 1   | 0   | 2   | 1   | 1   | 1   | 2   | 0   | 2   | 0   |
| G>T | 2   | 2   | 3   | 1   | 3   | 6   | 7   | 2   | 5   | 7   | 3   | 3   | 2   | 4   | 2   | 1   |
| T>A | 0   | 0   | 0   | 1   | 1   | 0   | 1   | 0   | 1   | 0   | 1   | 0   | 0   | 0   | 0   | 0   |
| T>C | 1   | 0   | 0   | 0   | 0   | 1   | 1   | 0   | 0   | 0   | 0   | 1   | 0   | 1   | 0   | 0   |
| T>G | 0   | 0   | 0   | 0   | 0   | 0   | 0   | 0   | 0   | 0   | 0   | 0   | 0   | 1   | 0   | 0   |

Supplementary Table 4d. Signature analysis of nonsynonymous mutations in individual genes.

| Gene    | A>C | A>G | A>T | C>A | C>G | C>T | G>A | G>C | G>T | T>A | T>C | T>G |
|---------|-----|-----|-----|-----|-----|-----|-----|-----|-----|-----|-----|-----|
| RPS6KA6 | 0   | 0   | 0   | 0   | 0   | 1   | 0   | 0   | 1   | 0   | 0   | 0   |
| HCK     | 0   | 0   | 1   | 1   | 0   | 1   | 0   | 0   | 1   | 0   | 0   | 0   |
| PRKCE   | 0   | 0   | 0   | 0   | 0   | 0   | 2   | 1   | 0   | 0   | 0   | 0   |
| ERBB4   | 1   | 2   | 2   | 1   | 1   | 0   | 0   | 0   | 2   | 0   | 0   | 0   |
| AURKB   | 0   | 0   | 0   | 0   | 0   | 0   | 0   | 1   | 0   | 0   | 0   | 0   |
| RAB6C   | 0   | 0   | 0   | 0   | 0   | 0   | 1   | 0   | 0   | 0   | 0   | 0   |
| STK24   | 0   | 0   | 0   | 0   | 0   | 1   | 0   | 0   | 0   | 0   | 0   | 0   |
| MAP4K1  | 0   | 0   | 0   | 0   | 0   | 1   | 0   | 1   | 1   | 0   | 0   | 0   |
| JAG2    | 0   | 0   | 0   | 0   | 0   | 0   | 1   | 0   | 2   | 0   | 0   | 0   |
| FH      | 0   | 0   | 0   | 0   | 0   | 0   | 1   | 0   | 0   | 0   | 0   | 0   |
| ROCK1   | 0   | 1   | 0   | 0   | 0   | 0   | 0   | 0   | 0   | 0   | 0   | 0   |
| ZAP70   | 0   | 0   | 0   | 0   | 0   | 1   | 0   | 0   | 0   | 0   | 0   | 0   |

|        |   |   |   |   |   |   |   |   |    |   |   |   |
|--------|---|---|---|---|---|---|---|---|----|---|---|---|
| STK10  | 0 | 0 | 0 | 0 | 0 | 0 | 0 | 1 | 0  | 0 | 0 | 0 |
| TPTE   | 0 | 1 | 0 | 0 | 0 | 0 | 0 | 0 | 0  | 0 | 0 | 0 |
| ACVR2B | 0 | 0 | 0 | 0 | 0 | 0 | 0 | 0 | 1  | 0 | 0 | 0 |
| MST1R  | 0 | 0 | 0 | 0 | 0 | 1 | 0 | 0 | 0  | 0 | 0 | 0 |
| RYK    | 0 | 1 | 0 | 0 | 0 | 0 | 0 | 0 | 0  | 0 | 0 | 0 |
| WT1    | 0 | 0 | 0 | 0 | 0 | 0 | 0 | 1 | 0  | 0 | 0 | 0 |
| IRAK1  | 0 | 0 | 0 | 0 | 0 | 1 | 0 | 0 | 1  | 0 | 0 | 0 |
| STK38L | 0 | 0 | 0 | 0 | 0 | 0 | 1 | 0 | 0  | 0 | 0 | 0 |
| FES    | 0 | 0 | 0 | 0 | 0 | 1 | 1 | 0 | 0  | 0 | 0 | 0 |
| ACVR1B | 0 | 0 | 0 | 0 | 0 | 0 | 1 | 0 | 0  | 0 | 0 | 0 |
| KDR    | 0 | 0 | 0 | 1 | 0 | 1 | 1 | 1 | 3  | 0 | 0 | 0 |
| MATK   | 1 | 0 | 0 | 0 | 0 | 0 | 0 | 0 | 0  | 0 | 0 | 0 |
| KSR1   | 0 | 0 | 0 | 0 | 0 | 1 | 0 | 0 | 0  | 0 | 1 | 0 |
| STAT2  | 0 | 0 | 0 | 0 | 0 | 0 | 0 | 1 | 0  | 0 | 0 | 0 |
| CBLB   | 0 | 0 | 0 | 0 | 1 | 0 | 0 | 0 | 1  | 0 | 0 | 0 |
| TP53   | 2 | 5 | 3 | 0 | 1 | 6 | 5 | 2 | 28 | 1 | 1 | 1 |
| NTRK1  | 0 | 0 | 0 | 0 | 1 | 1 | 1 | 0 | 3  | 0 | 0 | 1 |
| PTEN   | 0 | 0 | 0 | 0 | 0 | 2 | 1 | 0 | 0  | 0 | 1 | 0 |
| ROBO2  | 0 | 0 | 0 | 1 | 0 | 0 | 1 | 0 | 1  | 0 | 1 | 0 |
| MAST2  | 0 | 0 | 0 | 0 | 1 | 2 | 0 | 0 | 0  | 0 | 0 | 0 |
| PDGFRB | 0 | 0 | 0 | 0 | 1 | 2 | 0 | 0 | 0  | 0 | 0 | 0 |
| STYK1  | 0 | 1 | 0 | 0 | 0 | 0 | 0 | 0 | 0  | 0 | 0 | 0 |
| LZTR1  | 0 | 0 | 1 | 0 | 0 | 1 | 0 | 0 | 0  | 0 | 0 | 0 |
| EPHA3  | 0 | 0 | 0 | 3 | 0 | 0 | 1 | 1 | 4  | 1 | 0 | 1 |
| PRKCG  | 0 | 0 | 0 | 1 | 1 | 0 | 0 | 1 | 0  | 1 | 0 | 0 |
| JUP    | 0 | 0 | 0 | 0 | 0 | 2 | 0 | 0 | 0  | 0 | 0 | 0 |
| STK11  | 0 | 1 | 3 | 1 | 1 | 6 | 2 | 0 | 7  | 0 | 0 | 0 |
| CRKRS  | 0 | 0 | 0 | 0 | 0 | 0 | 0 | 1 | 1  | 0 | 0 | 0 |
| FLT1   | 0 | 0 | 0 | 2 | 0 | 0 | 0 | 1 | 0  | 0 | 0 | 0 |
| INSR   | 0 | 0 | 0 | 0 | 0 | 0 | 1 | 0 | 2  | 0 | 0 | 0 |
| TGFBR2 | 0 | 0 | 1 | 0 | 0 | 0 | 0 | 0 | 0  | 0 | 0 | 0 |



|         |   |   |   |   |   |   |   |   |   |   |   |   |
|---------|---|---|---|---|---|---|---|---|---|---|---|---|
| RAPGEF1 | 0 | 0 | 0 | 1 | 0 | 0 | 0 | 0 | 0 | 0 | 0 | 0 |
| LCK     | 0 | 0 | 0 | 0 | 0 | 1 | 0 | 0 | 0 | 0 | 0 | 0 |
| MEN1    | 0 | 0 | 0 | 0 | 0 | 0 | 0 | 0 | 1 | 0 | 0 | 0 |
| STK32C  | 0 | 0 | 0 | 0 | 0 | 0 | 1 | 0 | 0 | 0 | 0 | 0 |
| CDC2L5  | 0 | 0 | 0 | 0 | 2 | 0 | 0 | 0 | 0 | 0 | 0 | 0 |
| RAF1    | 0 | 0 | 0 | 0 | 0 | 0 | 0 | 0 | 1 | 0 | 0 | 0 |
| MST4    | 0 | 0 | 0 | 0 | 0 | 0 | 0 | 0 | 1 | 0 | 0 | 0 |
| PDK1    | 0 | 0 | 0 | 0 | 0 | 0 | 1 | 0 | 0 | 0 | 0 | 0 |
| ERG     | 0 | 0 | 0 | 1 | 0 | 0 | 0 | 0 | 1 | 0 | 0 | 0 |
| LMTK3   | 0 | 0 | 0 | 0 | 0 | 0 | 0 | 2 | 2 | 0 | 0 | 0 |
| SRMS    | 0 | 0 | 0 | 0 | 0 | 0 | 1 | 0 | 0 | 0 | 0 | 0 |
| LATS2   | 0 | 0 | 0 | 0 | 0 | 0 | 1 | 0 | 0 | 0 | 0 | 0 |
| PIK4CA  | 0 | 0 | 0 | 0 | 0 | 0 | 1 | 0 | 0 | 0 | 0 | 0 |
| MKNK2   | 0 | 0 | 1 | 1 | 0 | 0 | 0 | 0 | 0 | 0 | 0 | 0 |
| SMAD2   | 0 | 0 | 0 | 0 | 1 | 0 | 0 | 0 | 0 | 0 | 0 | 0 |
| SLA     | 0 | 0 | 0 | 0 | 0 | 0 | 1 | 0 | 0 | 0 | 0 | 0 |
| P2RXL1  | 0 | 0 | 0 | 0 | 0 | 0 | 0 | 0 | 1 | 0 | 0 | 0 |
| FYN     | 0 | 0 | 0 | 0 | 0 | 0 | 1 | 0 | 1 | 0 | 0 | 0 |
| FGFR1   | 0 | 0 | 0 | 0 | 1 | 0 | 1 | 0 | 0 | 0 | 0 | 0 |
| MET     | 0 | 0 | 0 | 0 | 0 | 0 | 0 | 0 | 1 | 1 | 0 | 0 |
| MRAS    | 0 | 0 | 0 | 0 | 0 | 0 | 1 | 0 | 0 | 0 | 0 | 0 |
| HD      | 0 | 0 | 0 | 0 | 0 | 0 | 0 | 0 | 1 | 0 | 0 | 0 |
| MAP3K3  | 0 | 0 | 0 | 0 | 0 | 1 | 0 | 0 | 1 | 0 | 0 | 0 |
| AXL     | 0 | 0 | 0 | 0 | 0 | 0 | 0 | 0 | 0 | 1 | 0 | 0 |
| CDK5    | 0 | 0 | 0 | 0 | 0 | 1 | 0 | 0 | 0 | 0 | 0 | 0 |
| ERAS    | 0 | 0 | 0 | 1 | 0 | 0 | 0 | 0 | 1 | 0 | 0 | 0 |
| VEGFC   | 1 | 0 | 0 | 0 | 0 | 0 | 0 | 0 | 1 | 0 | 0 | 0 |
| RPS6KA1 | 0 | 0 | 0 | 0 | 0 | 0 | 0 | 0 | 1 | 0 | 0 | 0 |
| PTPRD   | 0 | 1 | 0 | 2 | 2 | 0 | 0 | 0 | 2 | 2 | 0 | 1 |
| BRCA2   | 0 | 0 | 0 | 0 | 0 | 0 | 0 | 1 | 1 | 0 | 0 | 0 |
| MUSK    | 0 | 0 | 0 | 0 | 1 | 0 | 0 | 0 | 0 | 0 | 0 | 0 |

|          |   |   |   |   |   |   |   |   |   |   |   |   |
|----------|---|---|---|---|---|---|---|---|---|---|---|---|
| MYO3B    | 1 | 1 | 0 | 1 | 0 | 0 | 0 | 0 | 3 | 1 | 0 | 0 |
| CDK9     | 0 | 0 | 0 | 0 | 0 | 0 | 1 | 0 | 0 | 0 | 0 | 0 |
| PRKCQ    | 0 | 0 | 0 | 0 | 0 | 0 | 0 | 0 | 1 | 0 | 0 | 0 |
| PLCG2    | 0 | 0 | 0 | 0 | 0 | 0 | 0 | 0 | 2 | 0 | 0 | 0 |
| PIK3C2B  | 0 | 0 | 0 | 0 | 0 | 0 | 1 | 0 | 0 | 0 | 0 | 0 |
| CDC42BPG | 0 | 0 | 0 | 0 | 0 | 0 | 1 | 0 | 1 | 0 | 0 | 0 |
| JAK3     | 0 | 0 | 1 | 1 | 0 | 0 | 0 | 0 | 1 | 0 | 0 | 0 |
| PAK4     | 0 | 0 | 0 | 0 | 1 | 0 | 0 | 0 | 2 | 0 | 0 | 0 |
| JAK1     | 0 | 0 | 0 | 0 | 0 | 0 | 1 | 1 | 0 | 0 | 0 | 0 |
| CAMKV    | 0 | 0 | 0 | 0 | 0 | 0 | 1 | 0 | 1 | 0 | 0 | 0 |
| FGFR2    | 0 | 1 | 0 | 1 | 0 | 0 | 1 | 0 | 0 | 0 | 0 | 0 |
| SHC1     | 0 | 0 | 0 | 0 | 0 | 0 | 0 | 0 | 0 | 0 | 1 | 0 |
| TAOK3    | 0 | 0 | 0 | 0 | 0 | 0 | 0 | 0 | 1 | 0 | 0 | 0 |
| KIT      | 0 | 0 | 0 | 0 | 0 | 1 | 0 | 0 | 0 | 0 | 0 | 0 |
| PRKAR1A  | 0 | 0 | 1 | 0 | 0 | 0 | 0 | 0 | 0 | 0 | 0 | 0 |
| BRCA1    | 0 | 0 | 0 | 0 | 0 | 0 | 0 | 0 | 1 | 0 | 0 | 0 |
| STK36    | 0 | 0 | 0 | 0 | 0 | 0 | 0 | 1 | 1 | 0 | 0 | 0 |
| EPHA7    | 0 | 0 | 0 | 1 | 1 | 1 | 0 | 0 | 2 | 0 | 0 | 0 |
| PKN3     | 0 | 0 | 0 | 0 | 0 | 0 | 0 | 1 | 1 | 0 | 0 | 0 |
| ACVRL1   | 0 | 0 | 0 | 0 | 0 | 1 | 0 | 0 | 0 | 0 | 0 | 0 |
| INHBA    | 0 | 0 | 0 | 1 | 0 | 0 | 0 | 0 | 3 | 0 | 0 | 0 |
| IRAK2    | 0 | 0 | 0 | 0 | 0 | 0 | 1 | 0 | 1 | 0 | 0 | 0 |
| MYO3A    | 0 | 0 | 1 | 0 | 0 | 0 | 0 | 0 | 2 | 0 | 0 | 0 |
| AKT1     | 0 | 0 | 0 | 0 | 0 | 0 | 1 | 0 | 0 | 0 | 1 | 0 |
| PRKCH    | 0 | 0 | 0 | 0 | 0 | 0 | 0 | 0 | 1 | 0 | 0 | 0 |
| NTRK2    | 0 | 1 | 0 | 2 | 0 | 0 | 1 | 1 | 1 | 0 | 0 | 0 |
| JAK2     | 0 | 1 | 0 | 0 | 0 | 1 | 0 | 1 | 0 | 0 | 1 | 0 |
| GPC3     | 0 | 0 | 0 | 0 | 0 | 0 | 1 | 0 | 0 | 0 | 0 | 0 |
| CDKN2C   | 0 | 0 | 0 | 0 | 0 | 0 | 1 | 0 | 0 | 0 | 0 | 0 |
| MAPK6    | 0 | 0 | 0 | 0 | 1 | 1 | 0 | 0 | 1 | 0 | 0 | 0 |
| SMO      | 0 | 0 | 0 | 1 | 0 | 0 | 0 | 0 | 0 | 0 | 0 | 0 |

|           |   |   |   |   |   |   |   |   |   |   |   |   |
|-----------|---|---|---|---|---|---|---|---|---|---|---|---|
| PDGFRA    | 0 | 0 | 0 | 1 | 1 | 1 | 2 | 1 | 0 | 1 | 0 | 0 |
| BMPR1A    | 0 | 0 | 0 | 0 | 0 | 1 | 0 | 0 | 0 | 0 | 0 | 0 |
| MAP2K5    | 0 | 0 | 0 | 0 | 0 | 0 | 0 | 0 | 2 | 0 | 0 | 0 |
| LOC400891 | 0 | 0 | 0 | 1 | 0 | 0 | 0 | 0 | 0 | 0 | 0 | 0 |
| STAT3     | 0 | 0 | 0 | 0 | 0 | 0 | 0 | 0 | 1 | 0 | 0 | 0 |
| STK32A    | 0 | 0 | 1 | 0 | 0 | 0 | 0 | 0 | 0 | 0 | 0 | 0 |
| LRP1B     | 0 | 0 | 1 | 0 | 1 | 4 | 1 | 1 | 8 | 1 | 0 | 0 |
| EPHA2     | 0 | 0 | 0 | 0 | 0 | 0 | 0 | 0 | 1 | 0 | 0 | 0 |
| PAK7      | 0 | 0 | 0 | 3 | 1 | 0 | 0 | 0 | 0 | 0 | 0 | 0 |
| ROBO1     | 0 | 0 | 0 | 0 | 1 | 0 | 0 | 2 | 0 | 0 | 0 | 0 |
| MAML2     | 0 | 1 | 0 | 0 | 0 | 0 | 0 | 0 | 0 | 0 | 0 | 0 |
| KIAA1804  | 0 | 1 | 0 | 0 | 1 | 0 | 0 | 0 | 3 | 0 | 0 | 0 |
| EPHB6     | 0 | 0 | 0 | 2 | 0 | 0 | 1 | 0 | 2 | 0 | 0 | 0 |
| TEK       | 0 | 0 | 0 | 1 | 0 | 0 | 0 | 0 | 1 | 0 | 0 | 0 |
| LRRK1     | 0 | 0 | 0 | 1 | 0 | 0 | 1 | 0 | 0 | 0 | 0 | 0 |
| TSC1      | 0 | 0 | 0 | 0 | 0 | 1 | 0 | 0 | 1 | 0 | 0 | 0 |
| BARD1     | 0 | 0 | 0 | 0 | 0 | 0 | 1 | 0 | 1 | 0 | 0 | 0 |
| PRKACA    | 0 | 0 | 0 | 0 | 0 | 0 | 1 | 0 | 0 | 0 | 0 | 0 |
| HEMK1     | 0 | 0 | 1 | 0 | 0 | 0 | 0 | 0 | 0 | 0 | 0 | 0 |
| RIPK3     | 0 | 0 | 0 | 0 | 0 | 1 | 0 | 0 | 0 | 0 | 0 | 0 |
| PRKG1     | 0 | 0 | 0 | 0 | 0 | 0 | 1 | 0 | 0 | 0 | 0 | 0 |
| TNK2      | 0 | 0 | 0 | 0 | 1 | 0 | 0 | 0 | 0 | 0 | 0 | 0 |
| PTPN11    | 0 | 0 | 0 | 1 | 0 | 1 | 0 | 0 | 1 | 0 | 0 | 0 |
| PRKX      | 0 | 0 | 1 | 0 | 0 | 0 | 0 | 0 | 0 | 0 | 0 | 0 |
| NF1       | 0 | 1 | 1 | 0 | 0 | 1 | 0 | 3 | 7 | 0 | 0 | 1 |
| TUSC4     | 1 | 0 | 0 | 0 | 0 | 0 | 0 | 0 | 0 | 0 | 0 | 0 |
| SLC7A4    | 0 | 0 | 0 | 1 | 0 | 0 | 0 | 0 | 0 | 0 | 0 | 0 |
| PIK3CG    | 0 | 0 | 1 | 1 | 1 | 0 | 0 | 0 | 2 | 0 | 0 | 0 |
| PLCG1     | 0 | 0 | 0 | 0 | 0 | 0 | 1 | 0 | 0 | 0 | 0 | 0 |
| NLK       | 0 | 1 | 0 | 0 | 0 | 0 | 0 | 0 | 0 | 0 | 0 | 0 |
| MDM2      | 0 | 0 | 0 | 0 | 0 | 0 | 0 | 0 | 1 | 0 | 0 | 1 |

|          |   |   |   |   |   |   |   |   |   |   |   |    |
|----------|---|---|---|---|---|---|---|---|---|---|---|----|
| GNAS     | 0 | 0 | 1 | 1 | 1 | 1 | 1 | 0 | 1 | 0 | 0 | 0  |
| KSR2     | 0 | 0 | 1 | 0 | 0 | 0 | 1 | 0 | 0 | 0 | 0 | 0  |
| CYB561D2 | 0 | 0 | 0 | 1 | 0 | 0 | 0 | 0 | 0 | 0 | 0 | 0  |
| MLL      | 0 | 0 | 1 | 0 | 0 | 0 | 1 | 0 | 0 | 0 | 0 | 0  |
| MAP4K3   | 0 | 0 | 0 | 0 | 0 | 0 | 0 | 0 | 2 | 0 | 0 | 0  |
| PFTK1    | 0 | 0 | 0 | 0 | 0 | 0 | 1 | 1 | 1 | 0 | 0 | 0  |
| CTNNB1   | 0 | 0 | 0 | 0 | 0 | 1 | 1 | 0 | 0 | 0 | 0 | 0  |
| AIFM3    | 0 | 0 | 1 | 0 | 0 | 0 | 1 | 0 | 0 | 0 | 0 | 0  |
| MKNK1    | 0 | 0 | 2 | 0 | 0 | 0 | 0 | 0 | 0 | 0 | 0 | 0  |
| MYCL1    | 0 | 0 | 0 | 1 | 0 | 0 | 0 | 1 | 0 | 0 | 0 | 0  |
| EGFR     | 0 | 0 | 0 | 1 | 0 | 0 | 3 | 0 | 1 | 1 | 0 | 14 |
| PAK3     | 0 | 0 | 1 | 2 | 0 | 0 | 0 | 1 | 1 | 0 | 0 | 0  |
| IKBKB    | 0 | 0 | 0 | 0 | 0 | 0 | 0 | 0 | 1 | 0 | 0 | 0  |
| STK3     | 0 | 0 | 0 | 0 | 0 | 0 | 0 | 1 | 0 | 0 | 0 | 0  |
| MAP3K15  | 0 | 0 | 0 | 0 | 0 | 1 | 0 | 0 | 1 | 0 | 0 | 0  |
| MAML1    | 0 | 0 | 0 | 0 | 0 | 1 | 0 | 0 | 2 | 0 | 0 | 0  |
| BCL3     | 0 | 0 | 0 | 0 | 1 | 0 | 0 | 0 | 0 | 0 | 0 | 0  |
| TYK2     | 0 | 0 | 0 | 0 | 1 | 1 | 0 | 0 | 0 | 0 | 0 | 0  |
| SEMA3F   | 0 | 0 | 0 | 0 | 0 | 1 | 0 | 0 | 0 | 0 | 0 | 0  |
| TFDP1    | 0 | 0 | 1 | 0 | 0 | 0 | 1 | 1 | 1 | 0 | 0 | 0  |
| RIPK4    | 0 | 0 | 0 | 0 | 1 | 0 | 0 | 0 | 0 | 0 | 0 | 0  |
| PCTK2    | 0 | 0 | 0 | 0 | 1 | 0 | 0 | 0 | 0 | 1 | 0 | 0  |
| BMPR1B   | 0 | 0 | 0 | 0 | 1 | 0 | 0 | 0 | 1 | 0 | 0 | 0  |
| KIAA1303 | 0 | 0 | 0 | 0 | 0 | 0 | 1 | 0 | 1 | 0 | 0 | 0  |
| CCNE1    | 0 | 0 | 0 | 0 | 0 | 1 | 0 | 0 | 0 | 0 | 0 | 0  |
| ACVR1C   | 0 | 0 | 0 | 0 | 0 | 0 | 0 | 0 | 0 | 1 | 0 | 0  |
| CNTN4    | 0 | 0 | 0 | 0 | 0 | 0 | 0 | 0 | 0 | 1 | 0 | 0  |
| ROR2     | 0 | 0 | 0 | 1 | 1 | 1 | 0 | 1 | 1 | 0 | 0 | 0  |
| SGK2     | 0 | 0 | 0 | 0 | 0 | 0 | 1 | 0 | 0 | 0 | 0 | 0  |
| PIK3CA   | 0 | 0 | 0 | 0 | 0 | 1 | 0 | 0 | 0 | 0 | 0 | 0  |
| PIK3C2G  | 0 | 0 | 0 | 0 | 1 | 0 | 1 | 0 | 1 | 0 | 1 | 0  |

|         |   |   |   |   |   |   |   |   |   |   |   |   |
|---------|---|---|---|---|---|---|---|---|---|---|---|---|
| NOTCH2  | 0 | 0 | 0 | 0 | 0 | 0 | 0 | 0 | 1 | 0 | 0 | 0 |
| BMX     | 0 | 0 | 0 | 1 | 0 | 0 | 0 | 0 | 0 | 0 | 0 | 0 |
| PRKDC   | 0 | 0 | 1 | 0 | 0 | 0 | 2 | 1 | 2 | 0 | 0 | 0 |
| MAP3K2  | 0 | 0 | 0 | 0 | 0 | 1 | 0 | 0 | 0 | 0 | 0 | 0 |
| ALK     | 0 | 0 | 0 | 0 | 1 | 1 | 0 | 0 | 1 | 1 | 0 | 0 |
| MINK1   | 0 | 0 | 0 | 0 | 0 | 0 | 0 | 0 | 1 | 0 | 0 | 0 |
| MSH6    | 0 | 0 | 0 | 0 | 0 | 1 | 1 | 1 | 0 | 0 | 1 | 0 |
| GRB7    | 0 | 0 | 0 | 0 | 0 | 0 | 0 | 1 | 1 | 0 | 0 | 0 |
| ATM     | 1 | 0 | 0 | 1 | 0 | 1 | 1 | 2 | 3 | 1 | 2 | 0 |
| ERBB3   | 0 | 0 | 0 | 0 | 0 | 1 | 2 | 0 | 0 | 0 | 0 | 0 |
| ERBB2   | 0 | 0 | 0 | 0 | 0 | 1 | 2 | 0 | 0 | 0 | 0 | 0 |
| TRAIP   | 0 | 0 | 0 | 0 | 0 | 0 | 0 | 0 | 1 | 0 | 0 | 0 |
| SYK     | 0 | 0 | 0 | 0 | 0 | 0 | 0 | 1 | 0 | 0 | 0 | 0 |
| GSK3A   | 0 | 1 | 0 | 0 | 0 | 1 | 0 | 0 | 0 | 0 | 0 | 0 |
| MAPK7   | 0 | 0 | 0 | 0 | 0 | 0 | 1 | 0 | 0 | 0 | 0 | 0 |
| INSRR   | 0 | 0 | 1 | 2 | 1 | 0 | 0 | 0 | 0 | 0 | 1 | 1 |
| PRKCI   | 0 | 1 | 0 | 0 | 0 | 0 | 0 | 0 | 0 | 0 | 0 | 0 |
| DDR2    | 0 | 1 | 0 | 0 | 0 | 0 | 0 | 0 | 0 | 0 | 0 | 0 |
| PTK2    | 0 | 0 | 1 | 0 | 0 | 0 | 0 | 0 | 0 | 0 | 0 | 1 |
| CYSLTR2 | 0 | 0 | 0 | 0 | 0 | 0 | 1 | 0 | 1 | 0 | 0 | 0 |
| FOS     | 0 | 0 | 0 | 0 | 0 | 0 | 0 | 0 | 0 | 0 | 1 | 0 |
| GAK     | 0 | 0 | 0 | 0 | 0 | 0 | 0 | 0 | 1 | 0 | 0 | 0 |
| MAP3K10 | 0 | 0 | 0 | 0 | 0 | 0 | 0 | 1 | 1 | 0 | 0 | 0 |
| PAK6    | 0 | 0 | 0 | 0 | 0 | 0 | 1 | 0 | 0 | 0 | 0 | 0 |
| TP73L   | 0 | 0 | 0 | 1 | 0 | 0 | 0 | 0 | 3 | 0 | 0 | 0 |
| JUNB    | 0 | 0 | 0 | 0 | 0 | 0 | 0 | 0 | 1 | 0 | 0 | 0 |
| DDR1    | 0 | 0 | 0 | 0 | 0 | 0 | 0 | 0 | 1 | 1 | 0 | 0 |
| CHEK1   | 0 | 0 | 0 | 0 | 0 | 1 | 0 | 0 | 0 | 0 | 0 | 0 |
| SLC38A3 | 0 | 0 | 2 | 0 | 0 | 1 | 0 | 0 | 0 | 0 | 0 | 0 |
| RPS6KA4 | 0 | 0 | 0 | 0 | 0 | 0 | 0 | 1 | 0 | 0 | 0 | 0 |
| MAP4K4  | 0 | 0 | 0 | 0 | 0 | 1 | 0 | 0 | 0 | 0 | 0 | 0 |

|         |   |   |   |   |   |   |   |   |   |   |   |   |
|---------|---|---|---|---|---|---|---|---|---|---|---|---|
| EVI1    | 0 | 0 | 1 | 0 | 0 | 0 | 0 | 0 | 0 | 0 | 0 | 0 |
| DOCK3   | 0 | 0 | 0 | 1 | 1 | 0 | 0 | 2 | 0 | 1 | 1 | 0 |
| LATS1   | 0 | 0 | 0 | 1 | 0 | 1 | 0 | 0 | 1 | 0 | 0 | 0 |
| RHOB    | 0 | 0 | 0 | 0 | 0 | 0 | 0 | 0 | 1 | 0 | 0 | 0 |
| RALA    | 0 | 0 | 0 | 0 | 0 | 0 | 0 | 0 | 1 | 0 | 0 | 0 |
| GRK7    | 0 | 0 | 1 | 0 | 0 | 0 | 0 | 0 | 1 | 0 | 0 | 0 |
| LTK     | 0 | 0 | 0 | 2 | 0 | 1 | 3 | 0 | 0 | 0 | 0 | 0 |
| RBL2    | 0 | 0 | 0 | 0 | 0 | 1 | 1 | 0 | 0 | 0 | 0 | 0 |
| ITK     | 0 | 0 | 0 | 1 | 0 | 0 | 0 | 0 | 2 | 1 | 0 | 0 |
| ALS2CR2 | 0 | 0 | 1 | 0 | 0 | 0 | 0 | 0 | 0 | 0 | 0 | 0 |
| CCNG1   | 0 | 0 | 0 | 0 | 0 | 1 | 0 | 0 | 0 | 0 | 0 | 0 |
| PFTK2   | 0 | 0 | 0 | 1 | 0 | 0 | 0 | 0 | 0 | 0 | 0 | 0 |
| HRAS    | 0 | 0 | 0 | 0 | 0 | 0 | 0 | 0 | 0 | 0 | 1 | 0 |
| PRKACB  | 0 | 0 | 0 | 0 | 0 | 0 | 0 | 0 | 3 | 0 | 0 | 0 |
| STAT5B  | 0 | 0 | 0 | 0 | 0 | 1 | 0 | 0 | 1 | 0 | 0 | 0 |
| ARAF    | 0 | 0 | 0 | 0 | 0 | 0 | 1 | 0 | 0 | 0 | 0 | 0 |
| EPHA6   | 0 | 0 | 1 | 0 | 0 | 0 | 0 | 0 | 0 | 0 | 0 | 0 |
| FOXO3   | 0 | 0 | 1 | 0 | 0 | 0 | 0 | 0 | 1 | 0 | 0 | 0 |
| SKI     | 0 | 0 | 0 | 0 | 0 | 0 | 0 | 1 | 0 | 0 | 0 | 0 |
| APC     | 0 | 0 | 1 | 1 | 1 | 4 | 1 | 0 | 1 | 0 | 0 | 0 |
| SMAD4   | 0 | 0 | 0 | 2 | 0 | 0 | 0 | 1 | 0 | 0 | 0 | 0 |
| BCL6    | 0 | 0 | 0 | 0 | 0 | 1 | 0 | 0 | 1 | 0 | 0 | 0 |
| CDKN2B  | 0 | 0 | 0 | 0 | 0 | 1 | 0 | 0 | 0 | 0 | 0 | 0 |
| FNDC3A  | 0 | 0 | 0 | 0 | 1 | 0 | 1 | 0 | 0 | 0 | 0 | 0 |
| MAP3K6  | 0 | 0 | 0 | 0 | 2 | 0 | 0 | 0 | 0 | 0 | 0 | 0 |
| FGFR4   | 0 | 0 | 0 | 1 | 2 | 0 | 1 | 0 | 1 | 0 | 0 | 0 |
| IFRD2   | 0 | 0 | 0 | 1 | 0 | 1 | 0 | 0 | 0 | 0 | 0 | 0 |
| XRCC1   | 0 | 0 | 1 | 0 | 0 | 0 | 0 | 0 | 0 | 0 | 0 | 0 |
| STAT6   | 0 | 1 | 0 | 0 | 0 | 0 | 0 | 0 | 0 | 0 | 0 | 0 |
| PIK3C3  | 0 | 0 | 0 | 0 | 0 | 0 | 0 | 1 | 4 | 1 | 0 | 0 |
| SEMA3B  | 0 | 0 | 0 | 0 | 0 | 1 | 0 | 0 | 1 | 0 | 0 | 0 |

|          |   |   |   |   |   |   |   |   |   |   |   |   |
|----------|---|---|---|---|---|---|---|---|---|---|---|---|
| GCK      | 0 | 0 | 0 | 1 | 0 | 0 | 0 | 0 | 0 | 0 | 0 | 0 |
| CDH11    | 0 | 1 | 1 | 1 | 0 | 1 | 0 | 0 | 2 | 0 | 0 | 0 |
| EPHX1    | 0 | 0 | 0 | 0 | 0 | 0 | 0 | 0 | 1 | 0 | 0 | 0 |
| PIK3CD   | 0 | 0 | 0 | 1 | 0 | 0 | 1 | 0 | 0 | 0 | 0 | 0 |
| RASSF2   | 0 | 0 | 0 | 0 | 0 | 0 | 0 | 0 | 2 | 0 | 0 | 0 |
| CDKN2A   | 0 | 0 | 1 | 0 | 0 | 1 | 2 | 2 | 1 | 0 | 0 | 0 |
| CDC42BPA | 0 | 0 | 2 | 0 | 1 | 0 | 1 | 1 | 0 | 0 | 0 | 0 |
| VAV2     | 0 | 0 | 0 | 0 | 0 | 0 | 0 | 0 | 2 | 0 | 0 | 0 |
| MAPK8    | 0 | 0 | 0 | 0 | 0 | 1 | 0 | 0 | 0 | 0 | 0 | 0 |
| PTCH1    | 0 | 1 | 0 | 1 | 0 | 0 | 0 | 1 | 1 | 0 | 0 | 0 |
| IGF1R    | 0 | 0 | 0 | 0 | 1 | 0 | 0 | 0 | 1 | 0 | 0 | 0 |
| KLHL22   | 0 | 0 | 0 | 0 | 0 | 1 | 0 | 0 | 0 | 0 | 0 | 0 |
| RIPK1    | 0 | 0 | 0 | 0 | 0 | 1 | 0 | 0 | 0 | 0 | 0 | 0 |
| MAST4    | 0 | 0 | 0 | 0 | 0 | 0 | 0 | 1 | 1 | 0 | 0 | 0 |
| PRKD1    | 0 | 0 | 0 | 0 | 0 | 0 | 0 | 0 | 1 | 0 | 0 | 0 |
| IRS1     | 0 | 0 | 0 | 0 | 0 | 0 | 0 | 1 | 2 | 0 | 0 | 0 |
| TSHR     | 0 | 0 | 0 | 1 | 0 | 0 | 1 | 0 | 1 | 0 | 0 | 0 |
| MYC      | 0 | 0 | 0 | 0 | 0 | 0 | 0 | 0 | 1 | 0 | 0 | 0 |
| SRPK3    | 0 | 0 | 0 | 1 | 0 | 0 | 0 | 0 | 0 | 0 | 0 | 0 |
| ATR      | 0 | 0 | 0 | 0 | 0 | 0 | 1 | 0 | 0 | 0 | 0 | 0 |
| CSF1R    | 0 | 0 | 0 | 1 | 0 | 0 | 1 | 0 | 0 | 0 | 0 | 0 |
| NRK      | 0 | 0 | 0 | 0 | 0 | 1 | 1 | 0 | 0 | 0 | 0 | 0 |
| GRB14    | 0 | 0 | 0 | 0 | 0 | 0 | 0 | 0 | 1 | 0 | 0 | 0 |
| NOTCH3   | 0 | 0 | 0 | 0 | 0 | 2 | 0 | 0 | 0 | 0 | 0 | 0 |
| NTRK3    | 0 | 0 | 1 | 4 | 0 | 0 | 1 | 0 | 0 | 1 | 0 | 0 |
| CCNT2    | 0 | 0 | 0 | 0 | 1 | 0 | 0 | 0 | 0 | 0 | 0 | 0 |
| ABL1     | 0 | 0 | 0 | 0 | 0 | 1 | 0 | 0 | 1 | 0 | 0 | 0 |
| PTPRG    | 0 | 0 | 0 | 0 | 0 | 0 | 1 | 0 | 0 | 0 | 0 | 0 |
| MST1     | 0 | 0 | 0 | 0 | 0 | 0 | 0 | 0 | 0 | 0 | 1 | 0 |
| NF2      | 0 | 0 | 1 | 0 | 0 | 0 | 0 | 0 | 0 | 0 | 0 | 0 |
| LRRK2    | 0 | 0 | 0 | 1 | 0 | 0 | 1 | 0 | 0 | 0 | 0 | 0 |

|         |   |   |   |   |   |   |    |   |    |   |   |   |
|---------|---|---|---|---|---|---|----|---|----|---|---|---|
| PRKD3   | 0 | 0 | 0 | 0 | 0 | 2 | 0  | 0 | 0  | 0 | 0 | 0 |
| TYRO3   | 0 | 0 | 0 | 1 | 0 | 0 | 0  | 0 | 1  | 0 | 0 | 0 |
| TSC2    | 0 | 0 | 0 | 1 | 0 | 0 | 1  | 0 | 1  | 0 | 0 | 0 |
| TNNI3K  | 0 | 0 | 0 | 0 | 0 | 0 | 0  | 1 | 0  | 0 | 0 | 0 |
| MAPK4   | 0 | 0 | 0 | 1 | 0 | 0 | 1  | 0 | 0  | 0 | 0 | 0 |
| FLT4    | 0 | 0 | 0 | 0 | 1 | 0 | 0  | 1 | 1  | 0 | 2 | 0 |
| CDH4    | 0 | 0 | 0 | 0 | 0 | 0 | 1  | 0 | 1  | 0 | 0 | 0 |
| LTF     | 0 | 0 | 0 | 0 | 0 | 0 | 0  | 0 | 0  | 1 | 0 | 0 |
| EPHA5   | 0 | 0 | 0 | 1 | 1 | 0 | 2  | 0 | 3  | 0 | 0 | 0 |
| MAP3K12 | 0 | 0 | 0 | 0 | 0 | 1 | 1  | 0 | 0  | 0 | 0 | 0 |
| BUB1    | 0 | 0 | 0 | 0 | 0 | 0 | 0  | 0 | 1  | 0 | 0 | 0 |
| YES1    | 0 | 0 | 0 | 0 | 0 | 0 | 0  | 0 | 2  | 0 | 0 | 0 |
| ETS1    | 0 | 0 | 0 | 0 | 0 | 0 | 1  | 0 | 0  | 0 | 0 | 0 |
| CASK    | 0 | 0 | 0 | 0 | 0 | 0 | 0  | 1 | 0  | 0 | 0 | 0 |
| KRAS    | 0 | 0 | 1 | 0 | 0 | 0 | 11 | 8 | 38 | 0 | 0 | 0 |
| SMG1    | 0 | 1 | 0 | 0 | 0 | 1 | 0  | 0 | 1  | 0 | 0 | 0 |
| MYCN    | 0 | 0 | 0 | 0 | 0 | 1 | 0  | 0 | 0  | 0 | 0 | 0 |
| BRAF    | 0 | 0 | 0 | 0 | 1 | 0 | 0  | 0 | 2  | 0 | 0 | 0 |
| RBM5    | 0 | 0 | 0 | 0 | 0 | 0 | 1  | 0 | 0  | 0 | 0 | 0 |
| TEC     | 0 | 0 | 0 | 0 | 1 | 0 | 0  | 0 | 2  | 0 | 0 | 0 |
| FER     | 0 | 0 | 0 | 0 | 0 | 0 | 0  | 0 | 1  | 0 | 0 | 0 |
| CCNB3   | 0 | 0 | 0 | 0 | 0 | 0 | 0  | 0 | 1  | 0 | 0 | 0 |
| NOTCH1  | 0 | 0 | 0 | 0 | 0 | 0 | 1  | 0 | 1  | 0 | 0 | 0 |
| RALB    | 0 | 0 | 0 | 0 | 0 | 0 | 0  | 0 | 1  | 0 | 0 | 0 |
| GSK3B   | 0 | 0 | 1 | 0 | 0 | 0 | 1  | 0 | 0  | 0 | 0 | 0 |
| CDK7    | 0 | 0 | 0 | 0 | 0 | 0 | 0  | 1 | 0  | 0 | 0 | 0 |
| BAX     | 0 | 0 | 0 | 0 | 0 | 1 | 0  | 0 | 0  | 0 | 0 | 0 |
| ANKK1   | 0 | 0 | 0 | 0 | 0 | 0 | 0  | 0 | 1  | 0 | 0 | 0 |
| MERTK   | 0 | 1 | 1 | 0 | 0 | 2 | 0  | 0 | 0  | 0 | 0 | 0 |
| AKT3    | 0 | 0 | 1 | 0 | 0 | 0 | 0  | 0 | 0  | 0 | 0 | 0 |
| VAV3    | 0 | 0 | 0 | 1 | 1 | 0 | 0  | 0 | 0  | 0 | 0 | 0 |



|         |   |   |   |   |   |   |   |   |   |   |   |   |
|---------|---|---|---|---|---|---|---|---|---|---|---|---|
| DMPK    | 0 | 0 | 0 | 0 | 0 | 1 | 1 | 0 | 0 | 0 | 0 | 0 |
| FRK     | 0 | 0 | 0 | 0 | 0 | 0 | 1 | 0 | 0 | 0 | 0 | 0 |
| PINX1   | 0 | 0 | 0 | 0 | 0 | 0 | 0 | 0 | 1 | 0 | 0 | 0 |
| EPHA4   | 0 | 0 | 0 | 0 | 0 | 0 | 0 | 0 | 1 | 0 | 0 | 0 |
| TERT    | 0 | 0 | 0 | 0 | 0 | 1 | 2 | 1 | 1 | 0 | 0 | 0 |
| IKBKE   | 0 | 0 | 0 | 0 | 0 | 0 | 0 | 1 | 0 | 0 | 0 | 0 |
| RELA    | 0 | 0 | 0 | 0 | 0 | 0 | 1 | 0 | 0 | 0 | 0 | 0 |
| PASK    | 0 | 0 | 0 | 0 | 0 | 0 | 0 | 0 | 1 | 0 | 0 | 0 |
| TP73    | 0 | 0 | 0 | 0 | 0 | 0 | 0 | 0 | 1 | 0 | 0 | 0 |
| PRKCD   | 0 | 0 | 0 | 0 | 0 | 0 | 0 | 0 | 1 | 0 | 0 | 0 |
| RANBP9  | 0 | 0 | 0 | 0 | 0 | 0 | 0 | 1 | 0 | 0 | 0 | 0 |
| FEZF2   | 0 | 0 | 0 | 1 | 0 | 0 | 0 | 0 | 0 | 0 | 0 | 0 |
| EPHB4   | 0 | 0 | 0 | 0 | 0 | 0 | 1 | 0 | 1 | 0 | 0 | 0 |
| MYBL2   | 0 | 0 | 0 | 1 | 0 | 0 | 0 | 0 | 1 | 0 | 0 | 0 |
| CNTN6   | 0 | 0 | 0 | 0 | 0 | 0 | 0 | 0 | 1 | 0 | 0 | 0 |
| RAP2B   | 0 | 0 | 0 | 0 | 0 | 0 | 0 | 0 | 1 | 0 | 0 | 0 |
| RPSA    | 0 | 0 | 0 | 0 | 0 | 1 | 0 | 0 | 0 | 0 | 0 | 0 |
| RET     | 0 | 0 | 1 | 1 | 1 | 0 | 0 | 0 | 0 | 0 | 0 | 0 |
| MASTL   | 0 | 0 | 0 | 0 | 0 | 0 | 1 | 0 | 0 | 0 | 0 | 0 |
| ZAK     | 0 | 0 | 0 | 1 | 1 | 0 | 0 | 0 | 1 | 0 | 0 | 0 |
| ZMYND10 | 0 | 1 | 0 | 0 | 0 | 1 | 1 | 0 | 0 | 0 | 1 | 0 |
| EPHB1   | 0 | 0 | 1 | 0 | 1 | 0 | 0 | 1 | 2 | 0 | 0 | 0 |
| VAV1    | 0 | 0 | 0 | 0 | 0 | 0 | 1 | 0 | 0 | 0 | 1 | 0 |
| RB1     | 0 | 0 | 0 | 0 | 0 | 1 | 2 | 0 | 2 | 0 | 1 | 0 |
| RASEF   | 0 | 0 | 0 | 0 | 0 | 1 | 0 | 0 | 0 | 0 | 0 | 0 |
| STAT5A  | 0 | 1 | 0 | 0 | 0 | 0 | 0 | 0 | 0 | 0 | 0 | 0 |
| RBL1    | 0 | 0 | 0 | 0 | 0 | 0 | 1 | 0 | 1 | 0 | 1 | 0 |
| NRAS    | 0 | 0 | 3 | 0 | 0 | 0 | 0 | 0 | 0 | 0 | 0 | 0 |
| AURKA   | 0 | 0 | 0 | 0 | 0 | 1 | 0 | 0 | 0 | 0 | 0 | 0 |
| CROT    | 0 | 1 | 0 | 0 | 0 | 0 | 0 | 0 | 0 | 0 | 0 | 0 |
| LMTK2   | 1 | 0 | 0 | 0 | 0 | 0 | 0 | 0 | 3 | 0 | 0 | 0 |

|          |   |    |    |    |    |     |     |    |     |    |    |    |
|----------|---|----|----|----|----|-----|-----|----|-----|----|----|----|
| VHL      | 0 | 0  | 0  | 0  | 0  | 0   | 1   | 0  | 0   | 0  | 0  | 0  |
| BAP1     | 0 | 0  | 0  | 0  | 0  | 1   | 0   | 0  | 1   | 0  | 0  | 0  |
| MAP3K9   | 0 | 0  | 0  | 0  | 0  | 0   | 0   | 1  | 0   | 0  | 0  | 0  |
| RCBTB2   | 0 | 0  | 0  | 0  | 0  | 0   | 0   | 0  | 1   | 0  | 0  | 0  |
| PRKCB1   | 0 | 0  | 0  | 0  | 0  | 0   | 1   | 0  | 1   | 0  | 0  | 0  |
| MAP3K4   | 0 | 0  | 0  | 0  | 0  | 0   | 0   | 0  | 3   | 0  | 0  | 0  |
| MAST1    | 0 | 0  | 0  | 1  | 0  | 0   | 1   | 0  | 0   | 0  | 0  | 0  |
| EPHA1    | 0 | 0  | 0  | 0  | 0  | 0   | 1   | 0  | 0   | 0  | 0  | 0  |
| EIF4G1   | 0 | 0  | 0  | 0  | 0  | 1   | 0   | 0  | 0   | 0  | 0  | 0  |
| SRC      | 0 | 0  | 0  | 0  | 0  | 0   | 0   | 0  | 1   | 0  | 0  | 0  |
| FBXW7    | 0 | 1  | 0  | 0  | 0  | 0   | 0   | 0  | 1   | 0  | 0  | 0  |
| GATA1    | 0 | 0  | 0  | 1  | 1  | 0   | 0   | 0  | 0   | 0  | 0  | 0  |
| ERCC2    | 0 | 0  | 0  | 0  | 0  | 0   | 1   | 0  | 0   | 0  | 0  | 0  |
| PTCH2    | 0 | 0  | 0  | 0  | 0  | 0   | 0   | 0  | 2   | 0  | 0  | 0  |
| HYAL1    | 0 | 0  | 0  | 0  | 0  | 0   | 1   | 0  | 0   | 0  | 0  | 0  |
| PHOX2B   | 0 | 0  | 0  | 0  | 0  | 0   | 0   | 0  | 0   | 0  | 0  | 1  |
| CDC2L2   | 0 | 0  | 0  | 0  | 0  | 0   | 0   | 1  | 0   | 0  | 0  | 0  |
| ADRBK2   | 0 | 0  | 0  | 0  | 0  | 1   | 0   | 0  | 0   | 0  | 0  | 0  |
| CACNA2D2 | 0 | 0  | 0  | 0  | 0  | 0   | 0   | 0  | 1   | 0  | 0  | 0  |
| KLF6     | 0 | 1  | 0  | 0  | 0  | 0   | 0   | 0  | 0   | 0  | 0  | 0  |
| NOTCH4   | 0 | 0  | 0  | 0  | 0  | 0   | 0   | 0  | 1   | 0  | 0  | 0  |
| PIK3C2A  | 0 | 1  | 0  | 0  | 0  | 1   | 0   | 0  | 0   | 0  | 0  | 0  |
| MYB      | 0 | 0  | 0  | 0  | 0  | 0   | 1   | 0  | 1   | 0  | 0  | 0  |
| CDC25A   | 0 | 0  | 0  | 0  | 0  | 0   | 1   | 0  | 1   | 0  | 0  | 0  |
| RIN1     | 0 | 0  | 0  | 0  | 0  | 1   | 0   | 0  | 0   | 0  | 0  | 0  |
| PKN2     | 0 | 0  | 0  | 0  | 1  | 0   | 0   | 0  | 0   | 0  | 0  | 0  |
| total    | 9 | 35 | 56 | 83 | 55 | 111 | 134 | 71 | 294 | 22 | 22 | 23 |

Supplementary Table 5a. Collapsed categories shown in Supplementary Table 4b based on using Fisher's exact test ( $P < 0.05$ ). A total of 18 categories were considered to be statistically distinct.

|         |            |            |            |
|---------|------------|------------|------------|
| AC:ACGT | A:T>C:G:0  | A:T>G:C:12 | A:T>T:A:15 |
| GT:ACGT | A:T>C:G:3  | A:T>G:C:10 | A:T>T:A:3  |
| CG:ACGT | C:G>A:T:47 | C:G>G:C:11 | C:G>T:A:54 |
| T:ACGT  | C:G>A:T:19 | C:G>G:C:14 | C:G>T:A:43 |
| A:AT    | C:G>A:T:2  | C:G>G:C:0  | C:G>T:A:14 |
| A:CG    | C:G>A:T:8  | C:G>G:C:1  | C:G>T:A:8  |

Supplementary Table 5b. Gene-based background mutation rates.

| Gene   | Background mutation rate |
|--------|--------------------------|
| AADAC  | 3.82E-06                 |
| AATK   | 2.41E-06                 |
| ABL1   | 2.81E-06                 |
| ABL2   | 3.45E-06                 |
| ACTR2  | 3.77E-06                 |
| ACVR1  | 3.31E-06                 |
| ACVR1B | 2.92E-06                 |
| ACVR1C | 3.48E-06                 |
| ACVR2B | 2.64E-06                 |
| ACVRL1 | 2.61E-06                 |
| ADRBK1 | 2.55E-06                 |
| ADRBK2 | 3.39E-06                 |
| AIFM3  | 2.78E-06                 |
| AKT1   | 2.78E-06                 |
| AKT2   | 2.76E-06                 |
| AKT3   | 4.04E-06                 |
| ALK    | 2.81E-06                 |

---

|         |          |
|---------|----------|
| ALS2CR2 | 3.72E-06 |
| AMHR2   | 3.03E-06 |
| ANKK1   | 2.72E-06 |
| APC     | 4.11E-06 |
| ARAF    | 2.81E-06 |
| ARMET   | 2.86E-06 |
| ATM     | 3.94E-06 |
| ATR     | 3.85E-06 |
| AURKA   | 3.63E-06 |
| AURKB   | 2.88E-06 |
| AURKC   | 2.94E-06 |
| AXL     | 2.90E-06 |
| BAD     | 2.83E-06 |
| BAGE3   | 2.83E-06 |
| BAGE4   | 2.83E-06 |
| BAP1    | 2.89E-06 |
| BARD1   | 3.68E-06 |
| BAX     | 2.65E-06 |
| BCL2    | 2.43E-06 |
| BCL3    | 2.46E-06 |
| BCL6    | 3.07E-06 |
| BLK     | 2.73E-06 |
| BMPR1A  | 3.63E-06 |
| BMPR1B  | 3.69E-06 |
| BMPR2   | 3.77E-06 |
| BMX     | 3.47E-06 |
| BRAF    | 3.26E-06 |
| BRAP    | 3.12E-06 |
| BRCA1   | 3.67E-06 |
| BRCA2   | 4.05E-06 |
| BTK     | 3.48E-06 |
| BUB1    | 3.81E-06 |
| BUB1B   | 3.65E-06 |

---

---

|          |          |
|----------|----------|
| C3orf14  | 4.56E-06 |
| C3orf18  | 2.79E-06 |
| CACNA2D2 | 2.69E-06 |
| CADPS    | 3.07E-06 |
| CAMKV    | 3.10E-06 |
| CASK     | 3.56E-06 |
| CBL      | 3.15E-06 |
| CBLB     | 3.76E-06 |
| CBLC     | 2.63E-06 |
| CCNA1    | 3.26E-06 |
| CCNA2    | 3.25E-06 |
| CCNB3    | 3.09E-06 |
| CCND1    | 2.42E-06 |
| CCND2    | 2.70E-06 |
| CCND3    | 2.60E-06 |
| CCNE1    | 3.03E-06 |
| CCNE2    | 3.99E-06 |
| CCNG1    | 3.42E-06 |
| CCNG2    | 3.49E-06 |
| CCNH     | 3.52E-06 |
| CCNK     | 3.28E-06 |
| CCNT1    | 3.68E-06 |
| CCNT2    | 3.69E-06 |
| CCRK     | 2.63E-06 |
| CDC2     | 3.93E-06 |
| CDC25A   | 3.08E-06 |
| CDC25B   | 2.78E-06 |
| CDC25C   | 3.30E-06 |
| CDC2L2   | 2.65E-06 |
| CDC2L5   | 3.18E-06 |
| CDC2L6   | 3.27E-06 |
| CDC42BPA | 3.77E-06 |
| CDC42BPB | 2.84E-06 |

---

---

|          |          |
|----------|----------|
| CDC42BPG | 2.60E-06 |
| CDC7     | 3.92E-06 |
| CDH1     | 3.10E-06 |
| CDH11    | 3.12E-06 |
| CDH4     | 2.63E-06 |
| CDK10    | 2.52E-06 |
| CDK2     | 3.14E-06 |
| CDK3     | 2.81E-06 |
| CDK4     | 3.24E-06 |
| CDK5     | 2.64E-06 |
| CDK6     | 2.99E-06 |
| CDK7     | 3.63E-06 |
| CDK8     | 3.55E-06 |
| CDK9     | 2.80E-06 |
| CDKN1A   | 3.05E-06 |
| CDKN1B   | 2.76E-06 |
| CDKN1C   | 2.16E-06 |
| CDKN2A   | 2.88E-06 |
| CDKN2B   | 2.74E-06 |
| CDKN2C   | 2.94E-06 |
| CDKN2D   | 2.69E-06 |
| CDKN3    | 3.49E-06 |
| CEBPA    | 2.11E-06 |
| CHEK1    | 3.97E-06 |
| CHEK2    | 3.44E-06 |
| CISH     | 2.94E-06 |
| CNKSR1   | 2.80E-06 |
| CNTN4    | 3.65E-06 |
| CNTN6    | 3.84E-06 |
| CRK      | 2.70E-06 |
| CRKL     | 2.96E-06 |
| CRKRS    | 3.42E-06 |
| CROT     | 3.98E-06 |

---

---

|              |          |
|--------------|----------|
| CSF1R        | 2.85E-06 |
| CSK          | 2.77E-06 |
| CTNNB1       | 3.89E-06 |
| CYB561D2     | 2.58E-06 |
| CYLD         | 3.62E-06 |
| CYSLTR2      | 3.09E-06 |
| DDR1         | 2.77E-06 |
| DDR2         | 3.37E-06 |
| DHH          | 2.48E-06 |
| DIRAS3       | 2.62E-06 |
| DKFZP434N035 | 3.70E-06 |
| DMPK         | 2.51E-06 |
| DOCK3        | 3.08E-06 |
| DUSP24       | 3.20E-06 |
| DUSP6        | 2.44E-06 |
| E2F1         | 2.40E-06 |
| E2F2         | 2.55E-06 |
| E2F3         | 2.65E-06 |
| E2F4         | 3.01E-06 |
| E2F5         | 2.95E-06 |
| E2F6         | 2.84E-06 |
| EGFR         | 2.88E-06 |
| EIF4E        | 3.49E-06 |
| EIF4EBP1     | 2.75E-06 |
| EIF4G1       | 3.17E-06 |
| EPHA1        | 2.87E-06 |
| EPHA2        | 2.70E-06 |
| EPHA3        | 3.53E-06 |
| EPHA4        | 3.34E-06 |
| EPHA5        | 3.54E-06 |
| EPHA6        | 3.44E-06 |
| EPHA7        | 3.86E-06 |
| EPHA8        | 2.61E-06 |

---

---

|       |          |
|-------|----------|
| EPHB1 | 3.02E-06 |
| EPHB2 | 2.74E-06 |
| EPHB3 | 2.75E-06 |
| EPHB4 | 2.68E-06 |
| EPHB6 | 2.86E-06 |
| EPHX1 | 2.75E-06 |
| EPM2A | 2.77E-06 |
| ERAS  | 2.67E-06 |
| ERBB2 | 2.74E-06 |
| ERBB3 | 2.89E-06 |
| ERBB4 | 3.57E-06 |
| ERCC2 | 2.61E-06 |
| ERG   | 3.05E-06 |
| ETS1  | 3.16E-06 |
| ETS2  | 2.94E-06 |
| ETV6  | 2.94E-06 |
| ETV7  | 2.85E-06 |
| EVI1  | 3.36E-06 |
| FAS   | 3.46E-06 |
| FBXW7 | 3.95E-06 |
| FER   | 3.86E-06 |
| FES   | 2.62E-06 |
| FEV   | 2.18E-06 |
| FEZF2 | 2.29E-06 |
| FGF3  | 2.49E-06 |
| FGF4  | 2.21E-06 |
| FGF5  | 3.23E-06 |
| FGFR1 | 2.69E-06 |
| FGFR2 | 3.10E-06 |
| FGFR3 | 2.37E-06 |
| FGFR4 | 2.56E-06 |
| FGR   | 2.65E-06 |
| FH    | 3.61E-06 |

---



---

|          |          |
|----------|----------|
| FHIT     | 3.14E-06 |
| FKBP1A   | 3.18E-06 |
| FLJ25006 | 3.12E-06 |
| FLJ38608 | 2.62E-06 |
| FLT1     | 3.38E-06 |
| FLT3     | 3.23E-06 |
| FLT4     | 2.61E-06 |
| FNDC3A   | 4.51E-06 |
| FOS      | 2.60E-06 |
| FOSB     | 2.47E-06 |
| FOSL2    | 2.57E-06 |
| FOXO1A   | 2.67E-06 |
| FOXO3    | 2.60E-06 |
| FOXP1    | 3.25E-06 |
| FRK      | 3.46E-06 |
| FYN      | 3.35E-06 |
| GAK      | 2.53E-06 |
| GATA1    | 2.95E-06 |
| GBL      | 2.59E-06 |
| GCK      | 2.65E-06 |
| GGT2     | 2.52E-06 |
| GNAI2    | 2.64E-06 |
| GNAS     | 3.14E-06 |
| GNAT1    | 2.55E-06 |
| GPC3     | 3.20E-06 |
| GRB10    | 2.90E-06 |
| GRB14    | 3.19E-06 |
| GRB2     | 3.13E-06 |
| GRB7     | 2.90E-06 |
| GRK1     | 2.38E-06 |
| GRK4     | 3.29E-06 |
| GRK5     | 2.80E-06 |
| GRK6     | 2.66E-06 |

---

---

|       |          |
|-------|----------|
| GRK7  | 2.96E-06 |
| GSK3A | 2.54E-06 |
| GSK3B | 3.36E-06 |
| HCK   | 2.88E-06 |
| HD    | 2.95E-06 |
| HEMK1 | 3.00E-06 |
| HHIP  | 3.40E-06 |
| HIC2  | 2.69E-06 |
| HIF1A | 4.05E-06 |
| HRAS  | 2.55E-06 |
| HRPT2 | 4.01E-06 |
| HYAL1 | 3.04E-06 |
| HYAL2 | 3.17E-06 |
| HYAL3 | 2.90E-06 |
| IFRD2 | 2.90E-06 |
| IGF1R | 2.84E-06 |
| IHH   | 2.67E-06 |
| IKBKB | 2.89E-06 |
| IKBKE | 2.68E-06 |
| ILK   | 3.33E-06 |
| INHBA | 2.76E-06 |
| INSR  | 2.71E-06 |
| INSRR | 2.83E-06 |
| IRAK1 | 2.53E-06 |
| IRAK2 | 2.85E-06 |
| IRAK3 | 3.37E-06 |
| IRAK4 | 4.25E-06 |
| IRS1  | 2.92E-06 |
| IRS2  | 2.18E-06 |
| ITK   | 3.30E-06 |
| JAG1  | 2.88E-06 |
| JAG2  | 2.52E-06 |
| JAK1  | 3.21E-06 |

---

---

|           |          |
|-----------|----------|
| JAK2      | 3.99E-06 |
| JAK3      | 2.72E-06 |
| JUN       | 2.30E-06 |
| JUNB      | 2.38E-06 |
| JUND      | 2.12E-06 |
| JUP       | 2.62E-06 |
| KDR       | 3.42E-06 |
| KIAA1303  | 2.65E-06 |
| KIAA1804  | 2.75E-06 |
| KIT       | 3.35E-06 |
| KLF6      | 2.74E-06 |
| KLHL22    | 2.74E-06 |
| KRAS      | 3.88E-06 |
| KSR1      | 2.73E-06 |
| KSR2      | 2.71E-06 |
| LATS1     | 4.28E-06 |
| LATS2     | 2.65E-06 |
| LCK       | 2.74E-06 |
| LIMD1     | 3.00E-06 |
| LIMK1     | 2.70E-06 |
| LIMK2     | 2.84E-06 |
| LMTK2     | 2.80E-06 |
| LMTK3     | 2.36E-06 |
| LOC375133 | 2.60E-06 |
| LOC400891 | 2.85E-06 |
| LRP1B     | 3.81E-06 |
| LRRK1     | 2.67E-06 |
| LRRK2     | 3.63E-06 |
| LTF       | 2.96E-06 |
| LTK       | 2.62E-06 |
| LYK5      | 2.96E-06 |
| LYN       | 3.40E-06 |
| LZTR1     | 2.61E-06 |

---

---

|         |          |
|---------|----------|
| MAF     | 2.12E-06 |
| MAFA    | 2.12E-06 |
| MAFB    | 2.26E-06 |
| MAFF    | 2.30E-06 |
| MAFG    | 2.42E-06 |
| MAFK    | 2.56E-06 |
| MAML1   | 2.12E-06 |
| MAML2   | 3.31E-06 |
| MAML3   | 3.29E-06 |
| MAP2K1  | 2.98E-06 |
| MAP2K2  | 2.43E-06 |
| MAP2K4  | 3.40E-06 |
| MAP2K5  | 3.27E-06 |
| MAP2K6  | 3.36E-06 |
| MAP2K7  | 2.52E-06 |
| MAP3K1  | 3.43E-06 |
| MAP3K10 | 2.50E-06 |
| MAP3K11 | 2.72E-06 |
| MAP3K12 | 3.07E-06 |
| MAP3K13 | 3.41E-06 |
| MAP3K14 | 2.89E-06 |
| MAP3K15 | 2.99E-06 |
| MAP3K2  | 3.86E-06 |
| MAP3K3  | 3.09E-06 |
| MAP3K4  | 3.52E-06 |
| MAP3K5  | 3.32E-06 |
| MAP3K6  | 2.60E-06 |
| MAP3K7  | 3.75E-06 |
| MAP3K8  | 3.32E-06 |
| MAP3K9  | 2.85E-06 |
| MAP4K1  | 2.74E-06 |
| MAP4K3  | 3.91E-06 |
| MAP4K4  | 3.39E-06 |

---

---

|          |          |
|----------|----------|
| MAP4K5   | 3.80E-06 |
| MAPK1    | 3.03E-06 |
| MAPK10   | 3.25E-06 |
| MAPK11   | 2.53E-06 |
| MAPK12   | 2.51E-06 |
| MAPK13   | 2.57E-06 |
| MAPK14   | 3.19E-06 |
| MAPK15   | 2.60E-06 |
| MAPK3    | 2.44E-06 |
| MAPK4    | 2.41E-06 |
| MAPK6    | 3.78E-06 |
| MAPK7    | 3.01E-06 |
| MAPK8    | 3.74E-06 |
| MAPK9    | 3.76E-06 |
| MAPKAPK3 | 2.92E-06 |
| MAST1    | 2.57E-06 |
| MAST2    | 3.09E-06 |
| MAST3    | 2.63E-06 |
| MAST4    | 2.29E-06 |
| MASTL    | 3.61E-06 |
| MATK     | 2.62E-06 |
| MDM2     | 3.54E-06 |
| MDM4     | 3.65E-06 |
| MEN1     | 2.62E-06 |
| MERTK    | 3.17E-06 |
| MET      | 3.86E-06 |
| MGC16703 | 2.33E-06 |
| MINK1    | 2.88E-06 |
| MKNK1    | 3.04E-06 |
| MKNK2    | 2.66E-06 |
| MLH1     | 3.31E-06 |
| MLKL     | 3.20E-06 |
| MLL      | 3.43E-06 |

---

---

|          |          |
|----------|----------|
| MON1A    | 2.75E-06 |
| MOS      | 2.59E-06 |
| MPL      | 2.98E-06 |
| MRAS     | 2.99E-06 |
| MSH2     | 3.59E-06 |
| MSH6     | 3.66E-06 |
| MST1     | 2.85E-06 |
| MST1R    | 2.91E-06 |
| MST4     | 3.55E-06 |
| MUSK     | 3.59E-06 |
| MYB      | 3.43E-06 |
| MYBL1    | 4.06E-06 |
| MYBL2    | 2.80E-06 |
| MYC      | 2.54E-06 |
| MYCL1    | 2.57E-06 |
| MYCN     | 2.47E-06 |
| MYO3A    | 3.74E-06 |
| MYO3B    | 3.49E-06 |
| MYT1     | 2.86E-06 |
| NCK1     | 4.29E-06 |
| NCK2     | 2.51E-06 |
| NCYM     | 3.19E-06 |
| NF1      | 3.60E-06 |
| NF2      | 3.00E-06 |
| NFKB1    | 3.44E-06 |
| NLK      | 3.42E-06 |
| NOTCH1   | 2.46E-06 |
| NOTCH2   | 3.27E-06 |
| NOTCH2NL | 3.39E-06 |
| NOTCH3   | 2.69E-06 |
| NOTCH4   | 2.87E-06 |
| NRAS     | 3.59E-06 |
| NRK      | 3.69E-06 |

---

---

|         |          |
|---------|----------|
| NTRK1   | 2.66E-06 |
| NTRK2   | 3.12E-06 |
| NTRK3   | 3.11E-06 |
| OSR1    | 2.65E-06 |
| P2RXL1  | 2.76E-06 |
| P2RY5   | 3.63E-06 |
| PAK1    | 3.32E-06 |
| PAK2    | 3.62E-06 |
| PAK3    | 3.88E-06 |
| PAK4    | 2.48E-06 |
| PAK6    | 2.72E-06 |
| PAK7    | 2.84E-06 |
| PASK    | 2.76E-06 |
| PCQAP   | 2.76E-06 |
| PCTK1   | 2.88E-06 |
| PCTK2   | 3.68E-06 |
| PCTK3   | 2.68E-06 |
| PDGFB   | 2.76E-06 |
| PDGFRA  | 3.26E-06 |
| PDGFRB  | 2.76E-06 |
| PDK1    | 3.24E-06 |
| PEBP1   | 2.67E-06 |
| PFTK1   | 3.42E-06 |
| PFTK2   | 3.37E-06 |
| PHOX2B  | 2.51E-06 |
| PIK3C2A | 3.97E-06 |
| PIK3C2B | 2.80E-06 |
| PIK3C2G | 3.71E-06 |
| PIK3C3  | 3.77E-06 |
| PIK3CA  | 3.94E-06 |
| PIK3CB  | 3.70E-06 |
| PIK3CD  | 2.54E-06 |
| PIK3CG  | 3.03E-06 |

---

---

|         |          |
|---------|----------|
| PIK3R1  | 3.55E-06 |
| PIK3R2  | 2.48E-06 |
| PIK3R3  | 3.65E-06 |
| PIK3R4  | 3.83E-06 |
| PIK4CA  | 2.62E-06 |
| PIM1    | 2.53E-06 |
| PIM2    | 2.93E-06 |
| PIM3    | 2.33E-06 |
| PINX1   | 3.32E-06 |
| PKN1    | 2.52E-06 |
| PKN2    | 3.99E-06 |
| PKN3    | 2.70E-06 |
| PL6     | 2.66E-06 |
| PLCG1   | 2.86E-06 |
| PLCG2   | 2.88E-06 |
| PRKAB1  | 2.79E-06 |
| PRKACA  | 2.75E-06 |
| PRKACB  | 3.86E-06 |
| PRKACG  | 2.62E-06 |
| PRKAR1A | 3.71E-06 |
| PRKCA   | 3.10E-06 |
| PRKCB1  | 3.04E-06 |
| PRKCD   | 2.84E-06 |
| PRKCE   | 2.95E-06 |
| PRKCG   | 2.77E-06 |
| PRKCH   | 3.06E-06 |
| PRKCI   | 3.92E-06 |
| PRKCQ   | 3.07E-06 |
| PRKCZ   | 2.64E-06 |
| PRKD1   | 3.25E-06 |
| PRKD3   | 4.09E-06 |
| PRKDC   | 3.29E-06 |
| PRKG1   | 3.31E-06 |

---



---

|         |          |
|---------|----------|
| PRKG2   | 3.40E-06 |
| PRKX    | 2.55E-06 |
| PRKY    | 2.50E-06 |
| PTCH1   | 2.85E-06 |
| PTCH2   | 2.68E-06 |
| PTEN    | 3.69E-06 |
| PTK2    | 3.55E-06 |
| PTK2B   | 2.79E-06 |
| PTK7    | 2.91E-06 |
| PTPN11  | 3.57E-06 |
| PTPRD   | 3.64E-06 |
| PTPRG   | 3.23E-06 |
| RAB43   | 2.48E-06 |
| RAB6C   | 3.30E-06 |
| RAF1    | 3.33E-06 |
| RAGE    | 2.83E-06 |
| RALA    | 3.58E-06 |
| RALB    | 3.17E-06 |
| RAN     | 3.39E-06 |
| RANBP9  | 2.96E-06 |
| RAP1A   | 3.26E-06 |
| RAP1B   | 3.89E-06 |
| RAP2A   | 2.57E-06 |
| RAP2B   | 2.23E-06 |
| RAP2C   | 3.36E-06 |
| RAPGEF1 | 2.70E-06 |
| RARB    | 3.51E-06 |
| RASEF   | 2.48E-06 |
| RASSF1  | 2.79E-06 |
| RASSF2  | 2.98E-06 |
| RASSF3  | 2.88E-06 |
| RB1     | 3.69E-06 |
| RBL1    | 3.77E-06 |

---

---

|         |          |
|---------|----------|
| RBL2    | 3.94E-06 |
| RBM5    | 3.42E-06 |
| RBM6    | 3.73E-06 |
| RCBTB2  | 3.28E-06 |
| REEP5   | 2.92E-06 |
| REL     | 3.93E-06 |
| RELA    | 2.89E-06 |
| RELB    | 2.41E-06 |
| RET     | 2.56E-06 |
| RHEB    | 3.34E-06 |
| RHOA    | 3.42E-06 |
| RHOB    | 2.49E-06 |
| RHOBTB2 | 2.98E-06 |
| RHOC    | 2.92E-06 |
| RICTOR  | 3.74E-06 |
| RIN1    | 2.50E-06 |
| RIPK1   | 3.33E-06 |
| RIPK2   | 3.73E-06 |
| RIPK3   | 2.96E-06 |
| RIPK4   | 2.45E-06 |
| ROBO1   | 3.76E-06 |
| ROBO2   | 3.73E-06 |
| ROCK1   | 3.81E-06 |
| ROCK2   | 3.67E-06 |
| ROR1    | 3.21E-06 |
| ROR2    | 2.59E-06 |
| RPS6KA1 | 2.78E-06 |
| RPS6KA2 | 2.67E-06 |
| RPS6KA3 | 3.93E-06 |
| RPS6KA4 | 2.45E-06 |
| RPS6KA5 | 3.84E-06 |
| RPS6KA6 | 3.98E-06 |
| RPS6KB1 | 3.79E-06 |

---

---

|          |          |
|----------|----------|
| RPS6KB2  | 2.81E-06 |
| RPSA     | 3.78E-06 |
| RRAS     | 2.51E-06 |
| RRAS2    | 3.15E-06 |
| RUNX1    | 2.46E-06 |
| RUNX2    | 2.84E-06 |
| RUNX3    | 2.55E-06 |
| RYK      | 3.15E-06 |
| SCARF2   | 2.34E-06 |
| SEMA3B   | 3.00E-06 |
| SEMA3F   | 2.82E-06 |
| SERPIND1 | 3.03E-06 |
| SGK      | 3.04E-06 |
| SGK2     | 2.90E-06 |
| SGKL     | 3.92E-06 |
| SHC1     | 3.16E-06 |
| SHC2     | 2.32E-06 |
| SHC3     | 2.61E-06 |
| SHH      | 2.28E-06 |
| SIAH1    | 3.47E-06 |
| SKI      | 2.91E-06 |
| SLA      | 2.86E-06 |
| SLC38A3  | 2.69E-06 |
| SLC7A4   | 2.61E-06 |
| SLK      | 3.98E-06 |
| SMAD1    | 3.51E-06 |
| SMAD2    | 3.79E-06 |
| SMAD3    | 2.74E-06 |
| SMAD4    | 3.87E-06 |
| SMAD5    | 3.85E-06 |
| SMAD6    | 2.36E-06 |
| SMAD7    | 2.41E-06 |
| SMAD9    | 2.92E-06 |

---

---

|        |          |
|--------|----------|
| SMG1   | 3.60E-06 |
| SMO    | 2.69E-06 |
| SNAP29 | 2.96E-06 |
| SOS1   | 3.89E-06 |
| SOS2   | 3.84E-06 |
| SRC    | 2.52E-06 |
| SRMS   | 2.45E-06 |
| SRPK3  | 2.59E-06 |
| STAT1  | 3.24E-06 |
| STAT2  | 2.93E-06 |
| STAT3  | 2.99E-06 |
| STAT4  | 3.50E-06 |
| STAT5A | 2.68E-06 |
| STAT5B | 2.83E-06 |
| STAT6  | 2.87E-06 |
| STK10  | 2.78E-06 |
| STK11  | 2.52E-06 |
| STK24  | 2.74E-06 |
| STK25  | 2.58E-06 |
| STK3   | 3.78E-06 |
| STK32A | 3.36E-06 |
| STK32B | 2.81E-06 |
| STK32C | 2.41E-06 |
| STK36  | 3.00E-06 |
| STK38  | 3.85E-06 |
| STK38L | 3.93E-06 |
| STK39  | 3.17E-06 |
| STYK1  | 3.45E-06 |
| SUCNR1 | 3.38E-06 |
| SUFU   | 2.86E-06 |
| SYK    | 2.98E-06 |
| TAOK1  | 3.86E-06 |
| TAOK2  | 2.69E-06 |

---

---

|        |          |
|--------|----------|
| TAOK3  | 3.29E-06 |
| TBK1   | 4.10E-06 |
| TCF1   | 2.59E-06 |
| TEC    | 3.88E-06 |
| TEK    | 3.41E-06 |
| TERT   | 2.58E-06 |
| TESK1  | 2.73E-06 |
| TESK2  | 3.35E-06 |
| TFDP1  | 2.80E-06 |
| TGFB2  | 3.16E-06 |
| TGFBR1 | 3.44E-06 |
| TGFBR2 | 2.99E-06 |
| THAP7  | 2.72E-06 |
| TIE    | 2.81E-06 |
| TNIK   | 3.36E-06 |
| TNK1   | 2.74E-06 |
| TNK2   | 2.59E-06 |
| TNNI3K | 3.67E-06 |
| TP53   | 3.15E-06 |
| TP73   | 2.75E-06 |
| TP73L  | 3.14E-06 |
| TPTE   | 3.55E-06 |
| TRAIP  | 2.96E-06 |
| TSC1   | 3.22E-06 |
| TSC2   | 2.50E-06 |
| TSHR   | 2.97E-06 |
| TU3A   | 2.71E-06 |
| TUSC2  | 2.77E-06 |
| TUSC4  | 2.80E-06 |
| TXK    | 3.67E-06 |
| TYK2   | 2.72E-06 |
| TYRO3  | 2.91E-06 |
| UBE2L3 | 3.31E-06 |

---

|         |          |
|---------|----------|
| VAV1    | 2.83E-06 |
| VAV2    | 2.67E-06 |
| VAV3    | 3.57E-06 |
| VEGFC   | 3.05E-06 |
| VHL     | 2.60E-06 |
| WEE1    | 2.90E-06 |
| WT1     | 2.47E-06 |
| XRCC1   | 3.08E-06 |
| YES1    | 4.11E-06 |
| ZAK     | 3.58E-06 |
| ZAP70   | 2.61E-06 |
| ZMYND10 | 2.80E-06 |

Supplementary Table 5c. Collapsed categories shown in Supplementary Table 4b based on CpG context. Relative mutation rates measured for each category are shown as well.

| Mutations occurring at | Mutation rate relative to total |
|------------------------|---------------------------------|
| C or G in CpG          | 3.80                            |
| C or G                 | 1.38                            |
| A or T                 | 0.31                            |



Supplementary Table 6a. Significantly mutated genes (FDR < 0.1) identified using three different approaches. Significantly mutated genes in lung adenocarcinomas ranked by P\_value. Fixed background mutation rate (BMR) of 2.98E-06, gene-based BMRs, and category-based BMR of 3.30E-06, were used for the calculation.

| Gene    | Number of mutations | Number of base pairs covered | Fixed rate |           | Gene-based rate |           | Category-based rate |          |
|---------|---------------------|------------------------------|------------|-----------|-----------------|-----------|---------------------|----------|
|         |                     |                              | P_value    | FDR       | P_value         | FDR       | P_value             | FDR      |
| TP53    | 66                  | 231907                       | 2.56E-104  | 7.96E-102 | 9.62E-103       | 5.99E-100 | <1E-11              | <1E-8    |
| KRAS    | 61                  | 132847                       | 4.00E-109  | 2.49E-106 | 3.29E-102       | 1.03E-99  | <1E-11              | <1E-8    |
| STK11   | 34                  | 240919                       | 2.24E-44   | 4.65E-42  | 7.52E-47        | 1.56E-44  | <1E-11              | <1E-8    |
| EGFR    | 34                  | 749156                       | 2.91E-28   | 4.53E-26  | 9.88E-29        | 1.54E-26  | <1E-11              | <1E-8    |
| LRP1B   | 17                  | 2635000                      | 0.003135   | 0.092203  | 0.028039        | 0.415906  | 0.00856             | 0.197    |
| NF1     | 16                  | 1533738                      | 2.47E-05   | 0.0022    | 0.000209        | 0.018594  | 0.000114            | 0.00887  |
| ATM     | 14                  | 1758433                      | 0.001095   | 0.052459  | 0.011731        | 0.259916  | 0.00015             | 0.00921  |
| APC     | 13                  | 1613273                      | 0.001456   | 0.060476  | 0.01857         | 0.332869  | 8.64E-05            | 0.00769  |
| EPHA3   | 11                  | 570668                       | 1.85E-06   | 0.000192  | 8.89E-06        | 0.000923  | 1.01E-05            | 0.00105  |
| PTPRD   | 10                  | 1054147                      | 0.001555   | 0.060565  | 0.006227        | 0.175736  | 0.000163            | 0.00921  |
| CDKN2A  | 9                   | 148848                       | 1.24E-09   | 1.55E-07  | 9.14E-10        | 1.14E-07  | 1.40E-08            | 1.74E-06 |
| ERBB4   | 9                   | 754156                       | 0.00055    | 0.042844  | 0.001866        | 0.089403  | 0.000138            | 0.00921  |
| KDR     | 8                   | 785965                       | 0.002908   | 0.090575  | 0.006488        | 0.175736  | 0.00663             | 0.172    |
| FGFR4   | 7                   | 472000                       | 0.000644   | 0.044568  | 0.000261        | 0.020329  | 0.000784            | 0.0349   |
| NTRK1   | 7                   | 484439                       | 0.000748   | 0.046618  | 0.000379        | 0.02624   | 0.0101              | 0.218    |
| RB1     | 7                   | 514299                       | 0.001054   | 0.052459  | 0.003408        | 0.151634  | 0.00146             | 0.057    |
| NTRK3   | 7                   | 528299                       | 0.001227   | 0.05462   | 0.001543        | 0.080118  | 0.00319             | 0.105    |
| EPHA5   | 7                   | 581785                       | 0.002104   | 0.077118  | 0.005304        | 0.159716  | 0.00593             | 0.161    |
| PDGFRA  | 7                   | 630666                       | 0.00327    | 0.092203  | 0.00528         | 0.159716  | 0.0143              | 0.259    |
| GNAS    | 7                   | 635372                       | 0.003404   | 0.092203  | 0.004496        | 0.159716  | 0.0192              | 0.299    |
| LTK     | 6                   | 446513                       | 0.002515   | 0.087038  | 0.001313        | 0.074357  | 0.0312              | 0.442    |
| INHBA   | 5                   | 242179                       | 0.000904   | 0.05118   | 0.000635        | 0.039581  | 0.00147             | 0.0574   |
| PAK3    | 5                   | 317212                       | 0.002903   | 0.090575  | 0.008551        | 0.213096  | 0.00723             | 0.17     |
| ZMYND10 | 4                   | 240810                       | 0.006294   | 0.130701  | 0.005058        | 0.159716  | 0.000435            | 0.0208   |
| NRAS    | 3                   | 109611                       | 0.004571   | 0.109518  | 0.007599        | 0.197264  | 0.000216            | 0.0112   |
| SLC38A3 | 3                   | 173817                       | 0.015837   | 0.281891  | 0.012038        | 0.259916  | 0.00271             | 0.0992   |



Supplementary Table 6b. Pfam domains have significantly higher mutation rates above background (2.98e-06)

| Pfam domain     | # of mutations | Covered length | P_value  | FDR      | Bonferroni |
|-----------------|----------------|----------------|----------|----------|------------|
| P53             | 54             | 332196         | 9.46E-73 | 2.21E-70 | 2.21E-70   |
| Ras             | 71             | 1107696        | 3.02E-67 | 3.53E-65 | 7.06E-65   |
| Pkinase_Tyr     | 104            | 12298020       | 8.27E-20 | 6.45E-18 | 1.94E-17   |
| Pkinase         | 103            | 18050256       | 1.65E-09 | 9.65E-08 | 3.86E-07   |
| Recep_L_domain  | 16             | 1668876        | 6.49E-05 | 0.00276  | 0.015189   |
| P53_tetramer    | 4              | 71064          | 7.08E-05 | 0.00276  | 0.016562   |
| fn3             | 25             | 3825048        | 0.000333 | 0.01113  | 0.077909   |
| Furin-like      | 8              | 617016         | 0.000644 | 0.018828 | 0.150626   |
| NESP55          | 4              | 138180         | 0.000864 | 0.022456 | 0.202104   |
| Ldl_recept_b    | 16             | 2162376        | 0.001063 | 0.024866 | 0.248662   |
| MAM             | 3              | 88548          | 0.002516 | 0.053514 | 0.588659   |
| ig              | 15             | 2224980        | 0.003539 | 0.069002 | 0.828019   |
| Ldl_recept_a    | 14             | 2125716        | 0.005741 | 0.103346 | 1          |
| Y_phosphatase   | 7              | 737148         | 0.007404 | 0.116746 | 1          |
| TGFb_propeptide | 3              | 131412         | 0.007484 | 0.116746 | 1          |
| Ephrin_lbd      | 8              | 1005048        | 0.011798 | 0.17254  | 1          |
| CXCXC           | 2              | 60348          | 0.014356 | 0.197613 | 1          |

Supplementary Table 7a. Permutation analysis of concurrence among mutations in lung adenocarcinoma ( $P < 0.1$ ) by keeping the number of mutated samples in a given gene and the number of genes mutated in a given samples as constant.

| Gene 1 | Gene 2 | Number of samples with mutation in Gene 1 | Number of samples with mutation in gene 2 | Number of samples with mutation in both genes | Number of samples with mutation in only one gene | Expected number of samples with mutation in both genes by permutation | Expected number of samples with mutation in only one gene by permutation | P_value  | FDR      |
|--------|--------|-------------------------------------------|-------------------------------------------|-----------------------------------------------|--------------------------------------------------|-----------------------------------------------------------------------|--------------------------------------------------------------------------|----------|----------|
| PIK3C3 | PTPRD  | 5                                         | 10                                        | 4                                             | 7                                                | 0.708041                                                              | 13.58392                                                                 | 0.000967 | 0.196301 |
| NTRK2  | PDGFRA | 6                                         | 6                                         | 3                                             | 6                                                | 0.523618                                                              | 10.95276                                                                 | 0.006901 | 0.84158  |
| FGFR4  | NTRK2  | 7                                         | 6                                         | 3                                             | 7                                                | 0.605003                                                              | 11.78999                                                                 | 0.011104 | 0.880429 |
| FGFR4  | PDGFRA | 7                                         | 6                                         | 3                                             | 7                                                | 0.60568                                                               | 11.78864                                                                 | 0.01137  | 0.880429 |
| PDGFRA | PTPRD  | 6                                         | 10                                        | 3                                             | 10                                               | 0.842755                                                              | 14.31449                                                                 | 0.032151 | 1        |
| EPHA3  | LTK    | 10                                        | 6                                         | 3                                             | 10                                               | 0.84256                                                               | 14.31488                                                                 | 0.032326 | 1        |
| EPHA3  | TP53   | 10                                        | 64                                        | 9                                             | 56                                               | 5.963705                                                              | 62.07259                                                                 | 0.037207 | 1        |
| LRP1B  | TP53   | 16                                        | 64                                        | 13                                            | 54                                               | 9.327048                                                              | 61.3459                                                                  | 0.037567 | 1        |
| APC    | LRP1B  | 11                                        | 16                                        | 5                                             | 17                                               | 2.265757                                                              | 22.46849                                                                 | 0.042354 | 1        |
| DOCK3  | LTK    | 5                                         | 6                                         | 2                                             | 7                                                | 0.440355                                                              | 10.11929                                                                 | 0.057283 | 1        |
| NF1    | PTPRD  | 13                                        | 10                                        | 4                                             | 15                                               | 1.727687                                                              | 19.54463                                                                 | 0.063166 | 1        |
| EPHA7  | NF1    | 6                                         | 13                                        | 3                                             | 13                                               | 1.068754                                                              | 16.86249                                                                 | 0.06482  | 1        |
| NF1    | PDGFRA | 13                                        | 6                                         | 3                                             | 13                                               | 1.069703                                                              | 16.86059                                                                 | 0.065295 | 1        |
| GNAS   | PIK3C3 | 7                                         | 5                                         | 2                                             | 8                                                | 0.509754                                                              | 10.98049                                                                 | 0.077146 | 1        |
| NTRK3  | STK11  | 7                                         | 34                                        | 5                                             | 31                                               | 2.748182                                                              | 35.50364                                                                 | 0.079204 | 1        |
| INSRR  | PDGFRA | 6                                         | 6                                         | 2                                             | 8                                                | 0.523021                                                              | 10.95396                                                                 | 0.08151  | 1        |
| DOCK3  | KDR    | 5                                         | 8                                         | 2                                             | 9                                                | 0.576516                                                              | 11.84697                                                                 | 0.097414 | 1        |
| ATM    | KRAS   | 13                                        | 60                                        | 10                                            | 53                                               | 7.362754                                                              | 58.27449                                                                 | 0.099267 | 1        |

Supplementary Table 7b. Permutation analysis of mutual exclusion among mutations in lung adenocarcinoma ( $P < 0.1$ ) by keeping the number of mutated samples in a given gene and the number of genes mutated in a given samples as constant.

| Gene 1 | Gene 2 | Number of samples with mutation in Gene 1 | Number of samples with mutation in gene 2 | Number of samples with mutation in both genes | Number of samples with mutation in only one gene | Expected number of samples with mutation in both genes by permutation | Expected number of samples with mutation in only one gene by permutation | P_value  | FDR      |
|--------|--------|-------------------------------------------|-------------------------------------------|-----------------------------------------------|--------------------------------------------------|-----------------------------------------------------------------------|--------------------------------------------------------------------------|----------|----------|
| EGFR   | KRAS   | 30                                        | 60                                        | 0                                             | 90                                               | 15.88841                                                              | 58.22318                                                                 | 0        | 0        |
| EGFR   | STK11  | 30                                        | 34                                        | 1                                             | 62                                               | 10.33993                                                              | 43.32014                                                                 | 7.00E-06 | 0.002842 |
| ATM    | TP53   | 13                                        | 64                                        | 1                                             | 75                                               | 7.669006                                                              | 61.66199                                                                 | 9.50E-05 | 0.025713 |
| EGFR   | LRP1B  | 30                                        | 16                                        | 1                                             | 44                                               | 5.403172                                                              | 35.19366                                                                 | 0.007052 | 0.84158  |
| STK11  | TP53   | 34                                        | 64                                        | 12                                            | 74                                               | 18.55174                                                              | 60.89652                                                                 | 0.007255 | 0.84158  |
| EGFR   | EPHA3  | 30                                        | 10                                        | 0                                             | 40                                               | 3.502502                                                              | 32.995                                                                   | 0.009515 | 0.880429 |
| NF1    | STK11  | 13                                        | 34                                        | 1                                             | 45                                               | 4.926834                                                              | 37.14633                                                                 | 0.011927 | 0.880429 |
| EGFR   | TP53   | 30                                        | 64                                        | 11                                            | 72                                               | 16.61589                                                              | 60.76822                                                                 | 0.015579 | 0.990524 |
| KRAS   | MYO3B  | 60                                        | 7                                         | 1                                             | 65                                               | 4.061141                                                              | 58.87772                                                                 | 0.020671 | 0.990524 |
| GNAS   | KRAS   | 7                                         | 60                                        | 1                                             | 65                                               | 4.057897                                                              | 58.88421                                                                 | 0.020786 | 0.990524 |
| EGFR   | NF1    | 30                                        | 13                                        | 1                                             | 41                                               | 4.469908                                                              | 34.06018                                                                 | 0.022752 | 0.990524 |
| EGFR   | KDR    | 30                                        | 8                                         | 0                                             | 38                                               | 2.834468                                                              | 32.33106                                                                 | 0.024322 | 0.990524 |
| EGFR   | ERBB4  | 30                                        | 8                                         | 0                                             | 38                                               | 2.834851                                                              | 32.3303                                                                  | 0.024455 | 0.990524 |
| MYO3B  | STK11  | 7                                         | 34                                        | 0                                             | 41                                               | 2.747733                                                              | 35.50453                                                                 | 0.025325 | 0.990524 |
| GNAS   | STK11  | 7                                         | 34                                        | 0                                             | 41                                               | 2.74798                                                               | 35.50404                                                                 | 0.025368 | 0.990524 |
| FGFR4  | STK11  | 7                                         | 34                                        | 0                                             | 41                                               | 2.746662                                                              | 35.50668                                                                 | 0.025542 | 0.990524 |
| NTRK1  | STK11  | 7                                         | 34                                        | 0                                             | 41                                               | 2.746753                                                              | 35.50649                                                                 | 0.025617 | 0.990524 |
| KRAS   | TP53   | 60                                        | 64                                        | 24                                            | 76                                               | 29.86544                                                              | 64.26912                                                                 | 0.032204 | 1        |
| EGFR   | EPHA5  | 30                                        | 7                                         | 0                                             | 37                                               | 2.498488                                                              | 32.00302                                                                 | 0.03856  | 1        |
| EGFR   | NTRK3  | 30                                        | 7                                         | 0                                             | 37                                               | 2.497404                                                              | 32.00519                                                                 | 0.038661 | 1        |
| INSRR  | STK11  | 6                                         | 34                                        | 0                                             | 40                                               | 2.368251                                                              | 35.2635                                                                  | 0.042782 | 1        |
| KRAS   | STK11  | 60                                        | 34                                        | 13                                            | 68                                               | 17.72879                                                              | 58.54242                                                                 | 0.042897 | 1        |

|        |        |    |    |   |    |          |          |          |   |
|--------|--------|----|----|---|----|----------|----------|----------|---|
| PDGFRA | STK11  | 6  | 34 | 0 | 40 | 2.367546 | 35.26491 | 0.043273 | 1 |
| KRAS   | NF1    | 60 | 13 | 4 | 65 | 7.359486 | 58.28103 | 0.044014 | 1 |
| EGFR   | LTK    | 30 | 6  | 0 | 36 | 2.154057 | 31.69189 | 0.061911 | 1 |
| CDKN2A | STK11  | 9  | 34 | 1 | 41 | 3.49261  | 36.01478 | 0.069095 | 1 |
| EGFR   | PTPRD  | 30 | 10 | 1 | 38 | 3.499732 | 33.00054 | 0.072    | 1 |
| LRP1B  | STK11  | 16 | 34 | 3 | 44 | 5.958087 | 38.08383 | 0.076116 | 1 |
| APC    | TP53   | 11 | 64 | 4 | 67 | 6.53659  | 61.92682 | 0.094491 | 1 |
| EGFR   | PIK3C3 | 30 | 5  | 0 | 35 | 1.80596  | 31.38808 | 0.098305 | 1 |

Supplementary Table 7c. Permutation analysis of concurrence and mutual exclusion among mutations in lung adenocarcinoma ( $P < 0.1$ ) by keeping the number of mutations in a given gene and sample as constant.

| Gene 1 | Gene 2 | P_value  | Correlation[positive(1)<br>and negative(-1)] | FDR      |
|--------|--------|----------|----------------------------------------------|----------|
| EGFR   | KRAS   | 0        | -1                                           | 0        |
| STK11  | EGFR   | 0.000056 | -1                                           | 0.022736 |
| PIK3C3 | PTPRD  | 0.000575 | 1                                            | 0.136213 |
| ATM    | TP53   | 0.000671 | -1                                           | 0.136213 |
| NTRK2  | PDGFRA | 0.001877 | 1                                            | 0.304825 |
| PDGFRA | FGFR4  | 0.003435 | 1                                            | 0.46487  |
| NTRK2  | FGFR4  | 0.008477 | 1                                            | 0.687477 |
| LTK    | EPHA3  | 0.010365 | 1                                            | 0.687477 |
| APC    | LRP1B  | 0.011811 | 1                                            | 0.687477 |
| EGFR   | TP53   | 0.011997 | -1                                           | 0.687477 |
| NF1    | STK11  | 0.01236  | -1                                           | 0.687477 |
| NF1    | EGFR   | 0.012527 | -1                                           | 0.687477 |
| PDGFRA | PTPRD  | 0.013042 | 1                                            | 0.687477 |
| LRP1B  | EGFR   | 0.013149 | -1                                           | 0.687477 |
| EPHA3  | EGFR   | 0.013699 | -1                                           | 0.687477 |
| DOCK3  | CDH11  | 0.014314 | 1                                            | 0.687477 |
| LTK    | DOCK3  | 0.014393 | 1                                            | 0.687477 |
| STK11  | TP53   | 0.017367 | -1                                           | 0.783445 |
| NF1    | KRAS   | 0.020248 | -1                                           | 0.865336 |

|        |        |          |    |          |
|--------|--------|----------|----|----------|
| INSRR  | PDGFRA | 0.021521 | 1  | 0.873753 |
| PDGFRA | NF1    | 0.028267 | 1  | 1        |
| ERBB4  | EGFR   | 0.029278 | -1 | 1        |
| PRKDC  | PDGFRA | 0.032299 | 1  | 1        |
| EPHA7  | NF1    | 0.036185 | 1  | 1        |
| KDR    | EGFR   | 0.043148 | -1 | 1        |
| EPHA7  | LRP1B  | 0.04346  | 1  | 1        |
| PTPRD  | NF1    | 0.047795 | 1  | 1        |
| GNAS   | KRAS   | 0.049786 | -1 | 1        |
| MYO3B  | KRAS   | 0.049879 | -1 | 1        |
| DOCK3  | PTPRD  | 0.052729 | 1  | 1        |
| KRAS   | TP53   | 0.057688 | -1 | 1        |
| EPHA5  | EGFR   | 0.062234 | -1 | 1        |
| NTRK3  | EGFR   | 0.062797 | -1 | 1        |
| LTK    | CDH11  | 0.062879 | 1  | 1        |
| NTRK1  | STK11  | 0.062956 | -1 | 1        |
| FGFR4  | STK11  | 0.063005 | -1 | 1        |
| GNAS   | STK11  | 0.063109 | -1 | 1        |
| PDGFRA | STK11  | 0.063112 | -1 | 1        |
| MYO3B  | STK11  | 0.063657 | -1 | 1        |
| CDH11  | EPHA3  | 0.065685 | 1  | 1        |
| STK11  | KRAS   | 0.066042 | -1 | 1        |
| APC    | TP53   | 0.072656 | -1 | 1        |
| PTPRD  | EGFR   | 0.082674 | -1 | 1        |
| CDH11  | PRKDC  | 0.082786 | 1  | 1        |
| INSRR  | NTRK1  | 0.082881 | 1  | 1        |
| INSRR  | GNAS   | 0.082897 | 1  | 1        |
| PIK3C3 | GNAS   | 0.082947 | 1  | 1        |
| NTRK2  | PRKDC  | 0.083003 | 1  | 1        |
| PIK3C3 | PDGFRA | 0.083038 | 1  | 1        |
| LRP1B  | STK11  | 0.088567 | -1 | 1        |
| PDGFRA | EPHA3  | 0.092409 | 1  | 1        |
| INSRR  | STK11  | 0.09263  | -1 | 1        |

---

|        |       |          |    |   |
|--------|-------|----------|----|---|
| LTK    | EGFR  | 0.092744 | -1 | 1 |
| PIK3C3 | EGFR  | 0.092902 | -1 | 1 |
| CDH11  | EGFR  | 0.092987 | -1 | 1 |
| PRKDC  | EPHA3 | 0.093062 | 1  | 1 |
| EPHA7  | APC   | 0.094953 | 1  | 1 |
| NTRK3  | STK11 | 0.095363 | 1  | 1 |
| APC    | EGFR  | 0.095808 | -1 | 1 |
| INSRR  | LRP1B | 0.096179 | 1  | 1 |
| PIK3C3 | NTRK2 | 0.097889 | 1  | 1 |
| PIK3C3 | INSRR | 0.098443 | 1  | 1 |

---

Supplementary Table 8. Mutations in a set of genes show positive correlation with the overall mutation rate.

| Gene    | Num of mutations | Num. of mutations in samples with mutation | Covered base (bp) for samples with mutation | Mutation rate in samples with mutation | Num. of mutations in samples without mutation | Covered base (bp) for samples without mutation | Mutation rate in samples without mutation | P_value  | FDR      | Bonferroni |
|---------|------------------|--------------------------------------------|---------------------------------------------|----------------------------------------|-----------------------------------------------|------------------------------------------------|-------------------------------------------|----------|----------|------------|
| TP53    | 66               | 584                                        | 58444432                                    | 9.99E-06                               | 363                                           | 1.14E+08                                       | 3.18E-06                                  | 4.68E-68 | 1.67E-65 | 1.67E-65   |
| PRKDC   | 7                | 163                                        | 5935361                                     | 2.75E-05                               | 843                                           | 1.64E+08                                       | 5.13E-06                                  | 3.52E-59 | 6.27E-57 | 1.25E-56   |
| MYB     | 2                | 85                                         | 1638543                                     | 5.19E-05                               | 926                                           | 1.71E+08                                       | 5.43E-06                                  | 5.56E-51 | 6.60E-49 | 1.98E-48   |
| PDGFRA  | 7                | 140                                        | 5274829                                     | 2.65E-05                               | 866                                           | 1.67E+08                                       | 5.19E-06                                  | 2.09E-49 | 1.86E-47 | 7.45E-47   |
| DDR1    | 2                | 75                                         | 1609421                                     | 4.66E-05                               | 936                                           | 1.71E+08                                       | 5.49E-06                                  | 6.01E-42 | 4.28E-40 | 2.14E-39   |
| FGFR4   | 7                | 140                                        | 6183893                                     | 2.26E-05                               | 866                                           | 1.66E+08                                       | 5.22E-06                                  | 8.10E-42 | 4.81E-40 | 2.88E-39   |
| NTRK2   | 6                | 128                                        | 5290566                                     | 2.42E-05                               | 879                                           | 1.67E+08                                       | 5.27E-06                                  | 5.35E-41 | 2.72E-39 | 1.90E-38   |
| IRS1    | 3                | 90                                         | 2748187                                     | 3.27E-05                               | 920                                           | 1.69E+08                                       | 5.44E-06                                  | 2.50E-38 | 1.11E-36 | 8.90E-36   |
| INSRR   | 6                | 125                                        | 5420552                                     | 2.31E-05                               | 882                                           | 1.67E+08                                       | 5.30E-06                                  | 6.11E-38 | 2.41E-36 | 2.17E-35   |
| LRP1B   | 17               | 216                                        | 14443031                                    | 1.50E-05                               | 780                                           | 1.56E+08                                       | 5.01E-06                                  | 2.90E-37 | 1.03E-35 | 1.03E-34   |
| ROBO2   | 5                | 113                                        | 4576600                                     | 2.47E-05                               | 895                                           | 1.67E+08                                       | 5.35E-06                                  | 7.58E-37 | 2.40E-35 | 2.70E-34   |
| PIK3C2G | 4                | 98                                         | 3439595                                     | 2.85E-05                               | 911                                           | 1.68E+08                                       | 5.41E-06                                  | 8.10E-37 | 2.40E-35 | 2.88E-34   |
| PTPRD   | 10               | 162                                        | 9130117                                     | 1.77E-05                               | 841                                           | 1.63E+08                                       | 5.17E-06                                  | 8.25E-36 | 2.26E-34 | 2.94E-33   |
| SMG1    | 3                | 83                                         | 2516901                                     | 3.30E-05                               | 927                                           | 1.68E+08                                       | 5.51E-06                                  | 2.09E-35 | 5.31E-34 | 7.43E-33   |
| MAST4   | 2                | 71                                         | 1837120                                     | 3.86E-05                               | 940                                           | 1.7E+08                                        | 5.51E-06                                  | 9.59E-35 | 2.15E-33 | 3.41E-32   |

|        |   |    |         |          |     |          |          |          |          |          |
|--------|---|----|---------|----------|-----|----------|----------|----------|----------|----------|
| TYK2   | 2 | 71 | 1834392 | 3.87E-05 | 940 | 1.7E+08  | 5.52E-06 | 9.66E-35 | 2.15E-33 | 3.44E-32 |
| VAV1   | 2 | 66 | 1627946 | 4.05E-05 | 945 | 1.71E+08 | 5.54E-06 | 1.55E-33 | 3.24E-32 | 5.51E-31 |
| ACVRL1 | 2 | 69 | 1833040 | 3.76E-05 | 942 | 1.71E+08 | 5.52E-06 | 3.91E-33 | 7.66E-32 | 1.39E-30 |
| LMTK3  | 4 | 69 | 1834426 | 3.76E-05 | 940 | 1.7E+08  | 5.52E-06 | 4.09E-33 | 7.66E-32 | 1.45E-30 |
| PTPRG  | 2 | 65 | 1636558 | 3.97E-05 | 946 | 1.7E+08  | 5.56E-06 | 1.69E-32 | 2.87E-31 | 6.00E-30 |



Supplementary Table 9a. Top 100 genes showing strong correlation between DNA copy number and gene expression. 75 samples have been used for this analysis.

| Gene     | Correlation Coefficient | P-value  | FDR      |
|----------|-------------------------|----------|----------|
| ING1     | 0.787589                | 0        | 0        |
| ATP11B   | 0.790337                | 0        | 0        |
| ARMC1    | 0.797561                | 0        | 0        |
| MYNN     | 0.79396                 | 0        | 0        |
| C19orf12 | 0.802711                | 0        | 0        |
| IPO8     | 0.778825                | 2.22E-16 | 2.98E-13 |
| CDK8     | 0.773543                | 4.44E-16 | 3.97E-13 |
| TAF2     | 0.773286                | 4.44E-16 | 3.97E-13 |
| BRMS1L   | 0.772436                | 4.44E-16 | 3.97E-13 |
| PIK3CA   | 0.768906                | 8.88E-16 | 7.15E-13 |
| LSM1     | 0.751424                | 7.99E-15 | 5.85E-12 |
| MFN1     | 0.746529                | 1.49E-14 | 9.19E-12 |
| TOMM70A  | 0.7463                  | 1.53E-14 | 9.19E-12 |
| RFC4     | 0.745962                | 1.60E-14 | 9.19E-12 |
| PAN3     | 0.745238                | 1.75E-14 | 9.41E-12 |
| C19orf2  | 0.741453                | 2.78E-14 | 1.40E-11 |
| TXNL1    | 0.740337                | 3.20E-14 | 1.51E-11 |
| WHSC1L1  | 0.730942                | 9.70E-14 | 4.34E-11 |
| ANKRD10  | 0.725764                | 1.75E-13 | 7.43E-11 |
| GOLGA7   | 0.725289                | 1.85E-13 | 7.45E-11 |
| ARMC8    | 0.718214                | 4.07E-13 | 1.46E-10 |
| MIPEP    | 0.718096                | 4.12E-13 | 1.46E-10 |
| NAPG     | 0.717964                | 4.18E-13 | 1.46E-10 |
| SIAH2    | 0.705852                | 1.52E-12 | 5.11E-10 |
| GATAD1   | 0.70454                 | 1.75E-12 | 5.62E-10 |
| CDC42SE2 | 0.703671                | 1.91E-12 | 5.91E-10 |
| METTL4   | 0.702787                | 2.09E-12 | 6.23E-10 |
| RAE1     | 0.699145                | 3.03E-12 | 8.71E-10 |
| MRPS28   | 0.698281                | 3.31E-12 | 9.18E-10 |

---

|          |          |          |          |
|----------|----------|----------|----------|
| FXR1     | 0.693729 | 5.21E-12 | 1.40E-09 |
| SENP2    | 0.692081 | 6.14E-12 | 1.59E-09 |
| KPNA4    | 0.690294 | 7.31E-12 | 1.84E-09 |
| PNPT1    | 0.689265 | 8.08E-12 | 1.91E-09 |
| H2AFY    | 0.689256 | 8.09E-12 | 1.91E-09 |
| SEC23IP  | 0.687162 | 9.90E-12 | 2.28E-09 |
| RB1CC1   | 0.686496 | 1.06E-11 | 2.36E-09 |
| NEK3     | 0.684686 | 1.26E-11 | 2.73E-09 |
| PAK2     | 0.68375  | 1.37E-11 | 2.91E-09 |
| THUMPD1  | 0.682872 | 1.49E-11 | 3.08E-09 |
| PDCD6    | 0.680715 | 1.83E-11 | 3.68E-09 |
| MRPL47   | 0.679662 | 2.02E-11 | 3.96E-09 |
| ASH2L    | 0.67872  | 2.21E-11 | 4.23E-09 |
| KIAA0196 | 0.678123 | 2.33E-11 | 4.36E-09 |
| MAPK8    | 0.675327 | 3.02E-11 | 5.52E-09 |
| ZNF302   | 0.67314  | 3.69E-11 | 6.60E-09 |
| AKAP9    | 0.671911 | 4.13E-11 | 7.08E-09 |
| CEBPG    | 0.671885 | 4.14E-11 | 7.08E-09 |
| SNAP29   | 0.669106 | 5.32E-11 | 8.91E-09 |
| KRIT1    | 0.668002 | 5.87E-11 | 9.64E-09 |
| THOC1    | 0.662984 | 9.16E-11 | 1.47E-08 |
| NDUFB5   | 0.657272 | 1.50E-10 | 2.34E-08 |
| MTMR6    | 0.657214 | 1.51E-10 | 2.34E-08 |
| COG3     | 0.654448 | 1.91E-10 | 2.91E-08 |
| ZNF336   | 0.652457 | 2.27E-10 | 3.38E-08 |
| RASA1    | 0.649977 | 2.79E-10 | 4.01E-08 |
| FBXW11   | 0.649966 | 2.79E-10 | 4.01E-08 |
| RYK      | 0.649618 | 2.88E-10 | 4.06E-08 |
| SIP1     | 0.649243 | 2.97E-10 | 4.12E-08 |
| DBR1     | 0.648354 | 3.20E-10 | 4.36E-08 |
| PHC3     | 0.647082 | 3.55E-10 | 4.76E-08 |
| CTTN     | 0.646429 | 3.75E-10 | 4.94E-08 |
| PPP1R12A | 0.643372 | 4.82E-10 | 6.25E-08 |

---

---

|          |          |          |          |
|----------|----------|----------|----------|
| TBCA     | 0.642533 | 5.16E-10 | 6.59E-08 |
| PPFIA1   | 0.641975 | 5.40E-10 | 6.78E-08 |
| FAM91A1  | 0.640789 | 5.94E-10 | 7.35E-08 |
| CMAS     | 0.640512 | 6.07E-10 | 7.41E-08 |
| EIF3S3   | 0.639411 | 6.64E-10 | 7.97E-08 |
| ANKRD46  | 0.637646 | 7.65E-10 | 9.05E-08 |
| GTF3A    | 0.635617 | 8.99E-10 | 1.05E-07 |
| BAG4     | 0.635452 | 9.11E-10 | 1.05E-07 |
| BRWD1    | 0.634212 | 1.00E-09 | 1.14E-07 |
| DCTD     | 0.631675 | 1.23E-09 | 1.36E-07 |
| CHD7     | 0.631594 | 1.23E-09 | 1.36E-07 |
| CBLL1    | 0.630978 | 1.29E-09 | 1.40E-07 |
| WDSOF1   | 0.630884 | 1.30E-09 | 1.40E-07 |
| RAB20    | 0.629063 | 1.50E-09 | 1.59E-07 |
| E2F3     | 0.628737 | 1.54E-09 | 1.60E-07 |
| TPD52    | 0.628628 | 1.55E-09 | 1.60E-07 |
| NUP153   | 0.628439 | 1.58E-09 | 1.61E-07 |
| PEPD     | 0.627701 | 1.67E-09 | 1.67E-07 |
| PPM1A    | 0.627613 | 1.68E-09 | 1.67E-07 |
| TRIM35   | 0.625971 | 1.91E-09 | 1.86E-07 |
| FBXO25   | 0.625912 | 1.92E-09 | 1.86E-07 |
| KBTBD11  | 0.624305 | 2.17E-09 | 2.07E-07 |
| PRKCI    | 0.623971 | 2.22E-09 | 2.10E-07 |
| KIAA0804 | 0.621695 | 2.64E-09 | 2.44E-07 |
| ZRF1     | 0.62167  | 2.64E-09 | 2.44E-07 |
| TERF1    | 0.621577 | 2.66E-09 | 2.44E-07 |
| FBXO3    | 0.62047  | 2.89E-09 | 2.62E-07 |
| MAP3K1   | 0.619208 | 3.18E-09 | 2.84E-07 |
| COG5     | 0.618188 | 3.43E-09 | 3.04E-07 |
| CRI2     | 0.617574 | 3.59E-09 | 3.13E-07 |
| FBXO33   | 0.617479 | 3.62E-09 | 3.13E-07 |
| GABPA    | 0.616849 | 3.79E-09 | 3.25E-07 |
| VPS41    | 0.616634 | 3.85E-09 | 3.26E-07 |

---

|          |          |          |          |
|----------|----------|----------|----------|
| KIAA0274 | 0.616026 | 4.03E-09 | 3.38E-07 |
| NIPBL    | 0.614466 | 4.52E-09 | 3.75E-07 |
| PPP4R2   | 0.613194 | 4.97E-09 | 4.08E-07 |
| MRPS11   | 0.612392 | 5.27E-09 | 4.26E-07 |
| SDHC     | 0.612334 | 5.29E-09 | 4.26E-07 |

Supplementary Table 9b. Highly mutated genes showing strong correlation between DNA copy number and gene expression. 75 samples have been used for this analysis.

| Gene  | Correlation Coefficient | P-value  | FDR      |
|-------|-------------------------|----------|----------|
| EGFR  | 0.549427                | 3.31E-07 | 1.24E-05 |
| KRAS  | 0.523062                | 1.48E-06 | 4.08E-05 |
| NF1   | 0.5175                  | 1.99E-06 | 5.22E-05 |
| APC   | 0.50529                 | 3.77E-06 | 8.72E-05 |
| RB1   | 0.46645                 | 2.47E-05 | 0.000374 |
| PRKDC | 0.36225                 | 0.001405 | 0.008871 |
| EGFR  | 0.549427                | 3.31E-07 | 1.24E-05 |
| KRAS  | 0.523062                | 1.48E-06 | 4.08E-05 |
| NF1   | 0.5175                  | 1.99E-06 | 5.22E-05 |
| APC   | 0.50529                 | 3.77E-06 | 8.72E-05 |
| RB1   | 0.46645                 | 2.47E-05 | 0.000374 |
| PRKDC | 0.36225                 | 0.001405 | 0.008871 |
| EGFR  | 0.549427                | 3.31E-07 | 1.24E-05 |

Supplementary Table 10a. Correlation between mutation and copy number change in 188 lung adenocarcinomas.

| Gene            | Correlation |          |          |
|-----------------|-------------|----------|----------|
|                 | Coefficient | P value  | FDR      |
| <i>PTEN</i>     | -0.3789     | 8.24E-08 | 4.37E-06 |
| <i>EGFR</i>     | 0.331369    | 3.40E-06 | 9.01E-05 |
| <i>HCK</i>      | 0.262651    | 0.000271 | 0.00479  |
| <i>APC</i>      | -0.24861    | 0.000581 | 0.007702 |
| <i>KRAS</i>     | 0.224593    | 0.001944 | 0.017873 |
| <i>EPHB1</i>    | 0.223757    | 0.002023 | 0.017873 |
| <i>TP53</i>     | -0.17321    | 0.017451 | 0.132128 |
| <i>DOCK3</i>    | 0.158571    | 0.029744 | 0.197051 |
| <i>NTRK1</i>    | 0.152884    | 0.036208 | 0.213224 |
| <i>MERTK</i>    | 0.14518     | 0.046825 | 0.235745 |
| <i>CDC42BPA</i> | 0.141571    | 0.052629 | 0.235745 |
| <i>ITK</i>      | -0.14113    | 0.053376 | 0.235745 |

\*Genes with  $\geq 4$  mutations used for the analysis

\* *STK11*, *LTK*, *PTCH1*, *ZMYND10*, *PRKCG*, *LMTK3*, and *ERBB2* were not included in this analysis because there are no SNPs in those genes on affy 250k sty array.

Supplementary Table 10b. Correlation between mutation and gene expression in 41 lung adenocarcinomas.

| Gene            | Correlation |          |          |
|-----------------|-------------|----------|----------|
|                 | Coefficient | P value  | FDR      |
| <i>KRAS</i>     | 0.628025    | 1.10E-05 | 0.000364 |
| <i>EGFR</i>     | 0.589485    | 5.01E-05 | 0.000826 |
| <i>STK11</i>    | -0.36258    | 0.019819 | 0.218013 |
| <i>EPHB1</i>    | 0.314724    | 0.045055 | 0.32049  |
| <i>CDC42BPA</i> | 0.309995    | 0.048559 | 0.32049  |
| <i>RBI</i>      | 0.290554    | 0.065344 | 0.35939  |
| <i>PIK3C2G</i>  | -0.26772    | 0.090589 | 0.427062 |
| <i>PRKDC</i>    | -0.24786    | 0.118166 | 0.487435 |

---

|               |          |          |          |
|---------------|----------|----------|----------|
| <i>DOCK3</i>  | 0.231416 | 0.145447 | 0.506924 |
| <i>ATM</i>    | -0.22129 | 0.1644   | 0.506924 |
| <i>ROBO1</i>  | -0.21156 | 0.184241 | 0.506924 |
| <i>APC</i>    | -0.20903 | 0.189652 | 0.506924 |
| <i>PDGFRA</i> | -0.20448 | 0.199697 | 0.506924 |

---

\*Genes with  $\geq 4$  mutations used for the analysis.

\**PTCH1* and *KIAA1804* were not included in the analysis because there are no expression probes for those genes.

Supplementary Table 11. Copy number variations and mutations found in genes from MAPK signaling, Wnt signaling, P53 signaling, cell cycle, and mammalian target of rapamycin (mTOR) pathways. Excel spreadsheet can be assessed at [http://genome.wustl.edu/supplemental/tsp\\_nature\\_2008](http://genome.wustl.edu/supplemental/tsp_nature_2008).

Supplementary Table 12. Pathways significantly mutated in lung adenocarcinoma (mTOR pathway has been modified based on the literature and cancer type-specific pathways are not included). Fisher's exact test and binomial test were used. Background mutation rate of 2.98E-06 was used. See supplementary for details. Some cancer type-specific pathways are not shown.

| KEGG level | Pathway                                                | # of genes in pathway | # of genes outside of pathway | # of mutations in pathway | Covered bases in pathway | # of mutation outside of pathway | Covered bases outside of pathway | P value (Fisher's exact test) | FDR (Fisher's exact test) | P value (binomial test) | FDR (binomial test) |
|------------|--------------------------------------------------------|-----------------------|-------------------------------|---------------------------|--------------------------|----------------------------------|----------------------------------|-------------------------------|---------------------------|-------------------------|---------------------|
| level_3    | 04540 Gap junction [PATH:ko04540]                      | 34                    | 355                           | 137                       | 10482548                 | 614                              | 147881919                        | 3.62E-37                      | 2.53E-36                  | 4.13E-44                | 2.89E-43            |
| level_3    | 04320 Dorso-ventral axis formation [PATH:ko04320]      | 18                    | 371                           | 106                       | 8118994                  | 645                              | 150245473                        | 1.48E-28                      | 8.41E-28                  | 1.65E-34                | 8.84E-34            |
| level_3    | 04730 Long-term depression [PATH:ko04730]              | 22                    | 367                           | 92                        | 6880300                  | 659                              | 151484167                        | 5.77E-26                      | 3.09E-25                  | 6.25E-31                | 2.59E-30            |
| level_3    | 04115 p53 signaling pathway [PATH:ko04115]             | 21                    | 368                           | 103                       | 8337017                  | 648                              | 150027450                        | 7.96E-25                      | 4.03E-24                  | 1.10E-31                | 4.76E-31            |
| level_3    | 04530 Tight junction [PATH:ko04530]                    | 29                    | 360                           | 97                        | 7804914                  | 654                              | 150559553                        | 1.15E-23                      | 5.49E-23                  | 3.90E-30                | 1.54E-29            |
| level_3    | 04720 Long-term potentiation [PATH:ko04720]            | 28                    | 361                           | 90                        | 6991890                  | 661                              | 151372577                        | 1.40E-23                      | 6.38E-23                  | 3.84E-29                | 1.46E-28            |
| level_3    | 04912 GnRH signaling pathway [PATH:ko04912]            | 37                    | 352                           | 126                       | 11592020                 | 625                              | 146772447                        | 5.04E-23                      | 2.18E-22                  | 3.94E-33                | 1.99E-32            |
| level_3    | 04010 MAPK signaling pathway [PATH:ko04010]            | 109                   | 280                           | 289                       | 37995369                 | 462                              | 120369098                        | 2.13E-20                      | 8.79E-20                  | 2.06E-43                | 1.34E-42            |
| level_3    | 04310 Wnt signaling pathway [PATH:ko04310]             | 28                    | 361                           | 104                       | 9273619                  | 647                              | 149090848                        | 2.23E-20                      | 8.83E-20                  | 1.07E-28                | 3.90E-28            |
| level_3    | 04150 mTOR signaling pathway [PATH:ko04150]            | 36                    | 353                           | 142                       | 14499992                 | 609                              | 143864475                        | 3.47E-20                      | 1.32E-19                  | 1.63E-32                | 7.80E-32            |
| level_3    | 04210 Apoptosis [PATH:ko04210]                         | 32                    | 357                           | 115                       | 11649739                 | 636                              | 146714728                        | 1.21E-16                      | 4.39E-16                  | 5.91E-27                | 2.07E-26            |
| level_3    | 04662 B cell receptor signaling pathway [PATH:ko04662] | 25                    | 364                           | 92                        | 8742434                  | 659                              | 149622033                        | 1.29E-15                      | 4.51E-15                  | 9.79E-24                | 2.97E-23            |
| level_3    | 04810 Regulation of actin cytoskeleton [PATH:ko04810]  | 60                    | 329                           | 188                       | 23311155                 | 563                              | 135053312                        | 2.27E-15                      | 7.65E-15                  | 7.13E-32                | 3.24E-31            |
| level_3    | 04360 Axon guidance [PATH:ko04360]                     | 44                    | 345                           | 149                       | 18678583                 | 602                              | 139685884                        | 1.21E-11                      | 3.79E-11                  | 3.42E-25                | 1.15E-24            |
| level_3    | 04370 VEGF signaling pathway [PATH:ko04370]            | 33                    | 356                           | 101                       | 11321588                 | 650                              | 147042879                        | 3.36E-11                      | 1.02E-10                  | 7.71E-21                | 2.26E-20            |
| level_3    | 04020 Calcium signaling pathway [PATH:ko04020]         | 20                    | 369                           | 84                        | 9165249                  | 667                              | 149199218                        | 3.93E-10                      | 1.16E-09                  | 2.75E-18                | 7.36E-18            |
| level_3    | 04012 ErbB signaling pathway [PATH:ko04012]            | 68                    | 321                           | 177                       | 24438022                 | 574                              | 133926445                        | 9.23E-10                      | 2.62E-09                  | 4.78E-25                | 1.55E-24            |
| level_3    | 04110 Cell cycle [PATH:ko04110]                        | 46                    | 343                           | 133                       | 17688973                 | 618                              | 140675494                        | 1.78E-08                      | 4.92E-08                  | 1.46E-20                | 4.16E-20            |



Supplementary Table 13a. Some highly mutated genes display copy number variations. CN > 2.5 is used for assigning amplifications and CN < 1.5 is used for assigning deletions.

| Gene    | # of samples with mutation | # of samples with amplification | # of samples with deletion | # of samples with both mutation and amplification | # of samples with both mutation and deletion |
|---------|----------------------------|---------------------------------|----------------------------|---------------------------------------------------|----------------------------------------------|
| KRAS    | 60                         | 11                              | 4                          | 7                                                 | 1                                            |
| TP53    | 64                         | 13                              | 9                          | 2                                                 | 5                                            |
| EGFR    | 30                         | 16                              | 0                          | 6                                                 | 0                                            |
| CDKN2A  | 9                          | 1                               | 21                         | 0                                                 | 1                                            |
| EPHA3   | 10                         | 7                               | 3                          | 1                                                 | 0                                            |
| NF1     | 13                         | 7                               | 1                          | 0                                                 | 0                                            |
| ERBB4   | 8                          | 8                               | 1                          | 0                                                 | 0                                            |
| FGFR4   | 7                          | 24                              | 12                         | 2                                                 | 0                                            |
| NTRK1** | 7                          | 43                              | 1                          | 4                                                 | 0                                            |
| INHBA   | 5                          | 18                              | 0                          | 0                                                 | 0                                            |
| ATM     | 13                         | 2                               | 2                          | 0                                                 | 0                                            |
| RB1     | 7                          | 2                               | 1                          | 0                                                 | 0                                            |
| NTRK3   | 7                          | 0                               | 0                          | 0                                                 | 0                                            |
| APC     | 11                         | 4                               | 4                          | 1                                                 | 1                                            |
| PTPRD   | 10                         | 0                               | 8                          | 0                                                 | 1                                            |
| EPHA5   | 7                          | 6                               | 4                          | 0                                                 | 0                                            |
| LRP1B   | 16                         | 5                               | 2                          | 0                                                 | 0                                            |
| KDR     | 8                          | 3                               | 0                          | 1                                                 | 0                                            |
| PAK3    | 5                          | 13                              | 5                          | 0                                                 | 0                                            |
| PDGFRA  | 6                          | 1                               | 0                          | 0                                                 | 0                                            |
| GNAS    | 7                          | 16                              | 1                          | 1                                                 | 0                                            |
| CDH11   | 4                          | 1                               | 1                          | 1                                                 | 0                                            |
| NTRK2   | 6                          | 0                               | 0                          | 0                                                 | 0                                            |
| NRAS    | 3                          | 5                               | 3                          | 1                                                 | 0                                            |

\*\* NTRK1 is not from focal amplification region

Supplementary Table 13b. Some highly mutated genes display copy number variations. CN>3 is used for assigning amplifications and CN < 1.5 is used for assigning deletions.

| Gene    | # of samples with mutation | # of samples with amplification | # of samples with deletion | # of samples with both mutation and amplification | # of samples with both mutation and deletion |
|---------|----------------------------|---------------------------------|----------------------------|---------------------------------------------------|----------------------------------------------|
| KRAS    | 60                         | 3                               | 4                          | 2                                                 | 1                                            |
| TP53    | 64                         | 1                               | 9                          | 1                                                 | 5                                            |
| EGFR    | 30                         | 5                               | 0                          | 2                                                 | 0                                            |
| CDKN2A  | 9                          | 0                               | 21                         | 0                                                 | 1                                            |
| EPHA3   | 10                         | 1                               | 3                          | 0                                                 | 0                                            |
| NF1     | 13                         | 0                               | 1                          | 0                                                 | 0                                            |
| ERBB4   | 8                          | 0                               | 1                          | 0                                                 | 0                                            |
| FGFR4   | 7                          | 5                               | 12                         | 1                                                 | 0                                            |
| NTRK1** | 7                          | 11                              | 1                          | 1                                                 | 0                                            |
| INHBA   | 5                          | 3                               | 0                          | 0                                                 | 0                                            |
| ATM     | 13                         | 0                               | 2                          | 0                                                 | 0                                            |
| RB1     | 7                          | 0                               | 1                          | 0                                                 | 0                                            |
| NTRK3   | 7                          | 0                               | 0                          | 0                                                 | 0                                            |
| APC     | 11                         | 0                               | 4                          | 0                                                 | 1                                            |
| PTPRD   | 10                         | 0                               | 8                          | 0                                                 | 1                                            |
| EPHA5   | 7                          | 0                               | 4                          | 0                                                 | 0                                            |
| LRP1B   | 16                         | 0                               | 2                          | 0                                                 | 0                                            |
| KDR     | 8                          | 1                               | 0                          | 0                                                 | 0                                            |
| PAK3    | 5                          | 2                               | 5                          | 0                                                 | 0                                            |
| PDGFRA  | 6                          | 1                               | 0                          | 0                                                 | 0                                            |
| GNAS    | 7                          | 3                               | 1                          | 0                                                 | 0                                            |
| CDH11   | 4                          | 0                               | 1                          | 0                                                 | 0                                            |
| NTRK2   | 6                          | 0                               | 0                          | 0                                                 | 0                                            |
| NRAS    | 3                          | 0                               | 3                          | 0                                                 | 0                                            |

\*\* NTRK1 is not from focal amplification region.

Supplementary Table 14. Samples with at least two consecutive LOH events in STK11.

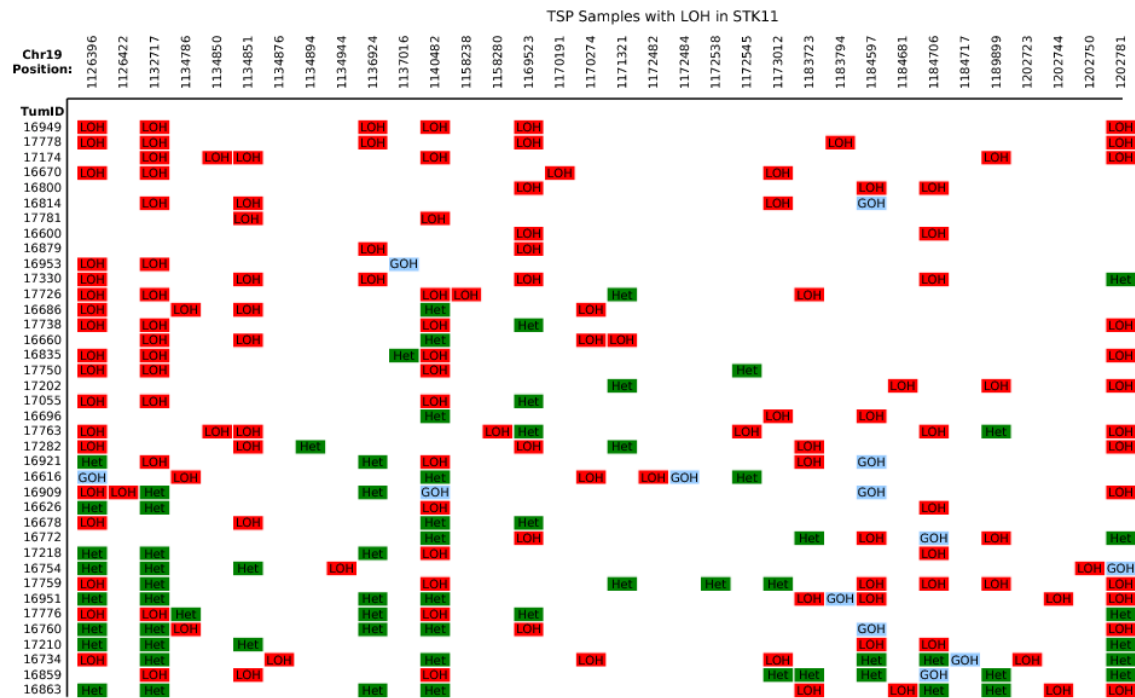

Supplementary Table 15a. Clinical information for samples used for SNP array, gene expression array, and DNA re-sequencing experiments and analyses.

|                 | SNP array      | Gene expression array | Re-sequencing |
|-----------------|----------------|-----------------------|---------------|
| Total           | 383            | 75                    | 188           |
| Smoker (*C, *F) | 245 (82,163)   | 45 (19,26)            | 124 (39,85)   |
| Never-smoker    | 39             | 8                     | 20            |
| Male            | 165            | 37                    | 72            |
| Female          | 215            | 38                    | 115           |
| Grade 1, 2,3    | 34, 138,173    | 1, 20,27              | 24, 85,71     |
| T-Stage 1,2,3,4 | 154,164,26, 18 | 21,32,11, 6           | 75,91,8,10    |

Note: Some samples with incomplete clinical information. \*C: current smoker; \*F: former smoker.

Supplementary Table 15b. Clinical information for 188 lung adenocarcinomas sequenced (including major subtype). Missing missing values for major subtype are coded as 99. Excel spreadsheet can be assessed at [http://genome.wustl.edu/supplemental/tsp\\_nature\\_2008](http://genome.wustl.edu/supplemental/tsp_nature_2008).

Supplementary Table 16. Tumors with no somatic mutations but with copy number variations (Amp: CN>2.5; Del: CN < 1.5) in the focal regions reported in Weir et al.<sup>11</sup>

| Sample | chr | start    | End      | mean_cn  |
|--------|-----|----------|----------|----------|
| 16746  | 8   | 1.21E+08 | 1.24E+08 | 2.513812 |
| 16804  | 7   | 69693285 | 69813285 | 2.626914 |
|        | 17  | 34800000 | 35180000 | 2.67426  |
|        | 22  | 19065446 | 20135446 | 2.575507 |
|        | 19  | 40270000 | 40430000 | 2.6881   |
|        | 17  | 41560000 | 41710000 | 2.586792 |
| 16810  | 5   | 8880000  | 10510000 | 2.573645 |
|        | 5   | 19720000 | 23090000 | 2.61864  |
| 16917  | 19  | 34790000 | 35420000 | 2.578989 |
|        | 17  | 34800000 | 35180000 | 2.542202 |
|        | 22  | 19065446 | 20135446 | 2.661321 |
|        | 19  | 40270000 | 40430000 | 2.995505 |
| 16997  | 5   | 750000   | 1620000  | 2.501844 |
| 17054  | 9   | 9410000  | 10400000 | 1.393052 |
|        | 5   | 58400000 | 59060000 | 1.425969 |
|        | 17  | 34800000 | 35180000 | 2.653528 |
|        | 11  | 68520000 | 69360000 | 2.713188 |
|        | 5   | 750000   | 1620000  | 2.639555 |
|        | 22  | 19065446 | 20135446 | 2.576534 |
|        | 6   | 43760000 | 44120000 | 2.56516  |
|        | 6   | 30240000 | 30530000 | 2.661515 |
|        | 7   | 91573285 | 92883285 | 1.407908 |
|        | 19  | 40270000 | 40430000 | 2.650569 |

---

|       |    |          |          |          |
|-------|----|----------|----------|----------|
| 17144 | 5  | 8880000  | 10510000 | 2.864439 |
|       | 5  | 19720000 | 23090000 | 3.174002 |
| 17252 | 5  | 750000   | 1620000  | 2.761063 |
|       | 5  | 19720000 | 23090000 | 2.630595 |
| 17737 | 18 | 21540000 | 21900000 | 2.865068 |

---

Supplementary Table 17. copy number data were visually inspected to categorize samples into three categories: pass, borderline, and fail.

| Sample_id | SNP<br>array<br>category | #_of_mutations |
|-----------|--------------------------|----------------|
| 16997     | Borderline               | 0              |
| 17240     | Borderline               | 0              |
| 16530     | Borderline               | 0              |
| 16674     | Borderline               | 0              |
| 16766     | Borderline               | 0              |
| 17054     | Borderline               | 0              |
| 17252     | Fail                     | 0              |
| 16614     | Fail                     | 0              |
| 16746     | Fail                     | 0              |
| 16804     | Fail                     | 0              |
| 17144     | Fail                     | 0              |
| 17248     | Fail                     | 0              |
| 17737     | Fail                     | 0              |
| 16612     | Fail                     | 0              |
| 16688     | Fail                     | 0              |
| 16720     | Fail                     | 0              |
| 16722     | Fail                     | 0              |
| 16758     | Fail                     | 0              |
| 16810     | Fail                     | 0              |
| 16889     | Fail                     | 0              |
| 16917     | Fail                     | 0              |
| 17208     | Fail                     | 0              |
| 17148     | Pass                     | 0              |
| 16768     | Pass                     | 0              |
| 16780     | Pass                     | 0              |
| 16630     | Borderline               | 1              |
| 16696     | Borderline               | 1              |
| 16770     | Borderline               | 1              |



---

|       |            |   |
|-------|------------|---|
| 16841 | Borderline | 1 |
| 16963 | Borderline | 1 |
| 16594 | Borderline | 1 |
| 16712 | Borderline | 1 |
| 16742 | Borderline | 1 |
| 16754 | Borderline | 1 |
| 16616 | Fail       | 1 |
| 17150 | Fail       | 1 |
| 17154 | Fail       | 1 |
| 16684 | Fail       | 1 |
| 16825 | Fail       | 1 |
| 17146 | Fail       | 1 |
| 17206 | Fail       | 1 |
| 17238 | Fail       | 1 |
| 17292 | Fail       | 1 |
| 17294 | Fail       | 1 |
| 17745 | Fail       | 1 |
| 16636 | Fail       | 1 |
| 16730 | Fail       | 1 |
| 16792 | Fail       | 1 |
| 16845 | Fail       | 1 |
| 17228 | Fail       | 1 |
| 17264 | Fail       | 1 |
| 16606 | Pass       | 1 |
| 16774 | Pass       | 1 |
| 16784 | Pass       | 1 |
| 17769 | Pass       | 1 |
| 16786 | Pass       | 1 |
| 16979 | Borderline | 2 |
| 16925 | Borderline | 2 |
| 17272 | Borderline | 2 |
| 16740 | Borderline | 2 |
| 16750 | Borderline | 2 |

---

---

|       |            |   |
|-------|------------|---|
| 16760 | Borderline | 2 |
| 16772 | Borderline | 2 |
| 17194 | Borderline | 2 |
| 16839 | Fail       | 2 |
| 16927 | Fail       | 2 |
| 17158 | Fail       | 2 |
| 16821 | Fail       | 2 |
| 16919 | Fail       | 2 |
| 16937 | Fail       | 2 |
| 17234 | Fail       | 2 |
| 17250 | Fail       | 2 |
| 17258 | Fail       | 2 |
| 17260 | Fail       | 2 |
| 17328 | Fail       | 2 |
| 16664 | Fail       | 2 |
| 16907 | Fail       | 2 |
| 16710 | Pass       | 2 |
| 16993 | Pass       | 2 |
| 17182 | Pass       | 2 |
| 17326 | Pass       | 2 |
| 17754 | Pass       | 2 |
| 17778 | Pass       | 2 |
| 16965 | Pass       | 2 |
| 17306 | Pass       | 2 |
| 16646 | Pass       | 2 |
| 17727 | Borderline | 3 |
| 17747 | Borderline | 3 |
| 16975 | Borderline | 3 |
| 17184 | Borderline | 3 |
| 17741 | Borderline | 3 |
| 17781 | Borderline | 3 |
| 16947 | Borderline | 3 |
| 17176 | Fail       | 3 |

---

---

|       |            |   |
|-------|------------|---|
| 17731 | Fail       | 3 |
| 17216 | Fail       | 3 |
| 17728 | Fail       | 3 |
| 16638 | Pass       | 3 |
| 17172 | Pass       | 3 |
| 17320 | Pass       | 3 |
| 16973 | Pass       | 3 |
| 17302 | Pass       | 3 |
| 16596 | Pass       | 3 |
| 16698 | Pass       | 3 |
| 16748 | Pass       | 3 |
| 17222 | Borderline | 4 |
| 17304 | Borderline | 4 |
| 17316 | Borderline | 4 |
| 17324 | Borderline | 4 |
| 16883 | Borderline | 4 |
| 16800 | Borderline | 4 |
| 16823 | Fail       | 4 |
| 16915 | Fail       | 4 |
| 17170 | Fail       | 4 |
| 17286 | Fail       | 4 |
| 16901 | Pass       | 4 |
| 17298 | Pass       | 4 |
| 17738 | Pass       | 4 |
| 17776 | Pass       | 4 |
| 17152 | Pass       | 4 |
| 17739 | Borderline | 5 |
| 17760 | Borderline | 5 |
| 17186 | Fail       | 5 |
| 17280 | Fail       | 5 |
| 17743 | Fail       | 5 |
| 17784 | Fail       | 5 |
| 16861 | Pass       | 5 |

---

---

|       |            |    |
|-------|------------|----|
| 16875 | Pass       | 5  |
| 17202 | Pass       | 5  |
| 17777 | Pass       | 5  |
| 17750 | Pass       | 5  |
| 16626 | Borderline | 6  |
| 16863 | Borderline | 6  |
| 17288 | Borderline | 6  |
| 17766 | Borderline | 6  |
| 16913 | Fail       | 6  |
| 17730 | Fail       | 6  |
| 16670 | Pass       | 6  |
| 17735 | Pass       | 6  |
| 16857 | Fail       | 7  |
| 16881 | Fail       | 7  |
| 16905 | Fail       | 7  |
| 17190 | Fail       | 7  |
| 16640 | Fail       | 7  |
| 16706 | Fail       | 7  |
| 16827 | Pass       | 7  |
| 17055 | Pass       | 7  |
| 16929 | Fail       | 8  |
| 17308 | Fail       | 8  |
| 16921 | Pass       | 8  |
| 17733 | Pass       | 8  |
| 17226 | Fail       | 9  |
| 17330 | Pass       | 9  |
| 16648 | Pass       | 9  |
| 16859 | Pass       | 9  |
| 17042 | Borderline | 10 |
| 17242 | Borderline | 10 |
| 17156 | Fail       | 10 |
| 16909 | Pass       | 10 |
| 17282 | Pass       | 10 |

---

---

|       |            |    |
|-------|------------|----|
| 17726 | Pass       | 10 |
| 17763 | Pass       | 10 |
| 16949 | Pass       | 10 |
| 16600 | Borderline | 11 |
| 17060 | Borderline | 11 |
| 16724 | Borderline | 11 |
| 16879 | Pass       | 11 |
| 17268 | Borderline | 12 |
| 16608 | Borderline | 13 |
| 16734 | Borderline | 13 |
| 16802 | Pass       | 13 |
| 17174 | Pass       | 13 |
| 16814 | Pass       | 13 |
| 17262 | Pass       | 13 |
| 16951 | Pass       | 14 |
| 16953 | Pass       | 16 |
| 17218 | Pass       | 17 |
| 17746 | Pass       | 18 |
| 16632 | Borderline | 20 |
| 16628 | Borderline | 22 |
| 17290 | Borderline | 23 |
| 17759 | Pass       | 24 |
| 16678 | Pass       | 28 |
| 16686 | Fail       | 29 |
| 16835 | Pass       | 30 |
| 16660 | Fail       | 36 |
| 16668 | Pass       | 38 |
| 17210 | Pass       | 49 |

---

## E. Supplementary References

1. Chen, K. et al. PolyScan: an automatic indel and SNP detection approach to the analysis of human resequencing data. *Genome Res* **17**, 659-66 (2007).
2. Nickerson, D.A., Tobe, V.O. & Taylor, S.L. PolyPhred: automating the detection and genotyping of single nucleotide substitutions using fluorescence-based resequencing. *Nucleic Acids Res* **25**, 2745-51 (1997).
3. Zhang, J. et al. SNPdetector: a software tool for sensitive and accurate SNP detection. *PLoS Comput Biol* **1**, e53 (2005).
4. Ng, P.C. & Henikoff, S. SIFT: Predicting amino acid changes that affect protein function. *Nucleic Acids Res* **31**, 3812-4 (2003).
5. Sunyaev, S. et al. Prediction of deleterious human alleles. *Hum Mol Genet* **10**, 591-7 (2001).
6. Ars, E. et al. Mutations affecting mRNA splicing are the most common molecular defects in patients with neurofibromatosis type 1. *Hum Mol Genet* **9**, 237-47 (2000).
7. Greenman, C., Wooster, R., Futreal, P.A., Stratton, M.R. & Easton, D.F. Statistical analysis of pathogenicity of somatic mutations in cancer. *Genetics* **173**, 2187-98 (2006).
8. Yang, Z., Nielsen, R., Goldman, N. & Pedersen, A.M. Codon-substitution models for heterogeneous selection pressure at amino acid sites. *Genetics* **155**, 431-49 (2000).
9. Pagani, F., Raponi, M. & Baralle, F.E. Synonymous mutations in CFTR exon 12 affect splicing and are not neutral in evolution. *Proc Natl Acad Sci U S A* **102**, 6368-72 (2005).
10. Getz, G. et al. Comment on "The consensus coding sequences of human breast and colorectal cancers". *Science* **317**, 1500 (2007).
11. Weir, B.A. et al. Characterizing the cancer genome in lung adenocarcinoma. *Nature* **450**, 893-8 (2007).
